# Supplementary material
Source: publisher site journal article supplement (https://www.spandidos-publications.com/2608/downloadSupplementary)
Supplement: Supplementary file 1 [file downloadSupplementary]

## Sheet: Table SVII
Table SVII. Differentially expressed genes in low-miR150 group compared with controls.
Name	Low-miR150		Control		log(fold-change)	t	P-value	False discovery rate
	Mean	SD	Mean	SD
CPA1	0.680906	0.99114	4.59206	1.3979	-3.91116	-35.5205	1.76163e-168	3.10999e-164
CA4	1.36487	1.85405	8.04513	1.44012	-6.68026	-35.2885	4.60987e-167	4.06913e-163
FIGF	2.77665	1.89774	9.18002	0.955087	-6.40338	-33.8361	3.82088e-158	2.24846e-154
MYOC	1.07096	1.54598	7.16959	2.65979	-6.09864	-33.7509	1.28178e-157	5.65714e-154
HSD17B13	1.63396	1.26914	6.53582	2.04704	-4.90185	-33.651	5.2928e-157	1.86878e-153
NEK2	8.55364	1.25055	4.08191	1.4842	4.47173	33.2908	8.87046e-155	2.60998e-151
MESTIT1	1.16562	0.946148	4.55827	1.16253	-3.39265	-33.1699	4.95481e-154	1.2496e-150
MMP11	12.4346	1.84028	6.41795	0.964543	6.01668	32.7365	2.38315e-151	5.25903e-148
GPAM	8.77878	0.888386	12.4333	1.9097	-3.65456	-32.5645	2.77272e-150	5.43885e-147
LYVE1	4.95401	1.49425	10.2075	1.8668	-5.25348	-32.4453	1.51955e-149	2.68261e-146
COL10A1	10.7364	2.16458	3.75524	1.26979	6.98117	32.1432	1.13846e-147	1.82712e-144
GLYAT	1.41249	1.70999	7.51926	2.54734	-6.10676	-31.7607	2.70368e-145	3.97757e-142
ADH4	0.55337	0.966697	4.17129	1.73825	-3.61792	-31.5741	3.91012e-144	5.30995e-141
LOC572558	0.576884	0.927908	3.68145	1.03135	-3.10457	-31.4595	2.01969e-143	2.54683e-140
APOB	1.65447	1.48038	6.89351	2.34988	-5.23904	-30.97	2.25109e-140	2.64938e-137
PKMYT1	8.17813	1.3627	3.64533	1.67231	4.5328	30.7931	2.85169e-139	3.14649e-136
ADRA1A	1.12606	1.1188	5.02386	1.7267	-3.8978	-30.7024	1.0472e-138	1.08748e-135
AQP7P1	1.78753	1.64832	7.20445	2.08237	-5.41692	-30.2677	5.38737e-136	5.28381e-133
CAV1	10.1889	1.10613	13.6604	1.08507	-3.4715	-30.0211	1.86121e-134	1.72936e-131
LOC283392	1.51207	1.68954	7.11631	2.39936	-5.60424	-29.8291	2.94094e-133	2.59596e-130
LRRC3B	1.05989	1.21173	4.77714	1.06069	-3.71725	-29.7169	1.47683e-132	1.24152e-129
AQP7P3	0.537168	0.831129	3.827	2.04291	-3.28983	-29.5762	1.11721e-131	8.96508e-129
KIF4A	8.59037	1.33032	4.44003	1.41973	4.15034	29.5245	2.34734e-131	1.80174e-128
PAFAH1B3	10.2183	0.818656	7.54603	1.14253	2.67226	29.4382	8.11873e-131	5.972e-128
HPSE2	1.18623	1.43237	5.5358	1.25276	-4.34958	-29.4237	1.00048e-130	7.06501e-128
KIAA0101	8.10919	1.11705	4.62232	1.26449	3.48687	29.2791	8.01122e-130	5.43962e-127
ANGPTL7	1.41725	1.74058	6.76944	1.82052	-5.3522	-29.1874	2.99613e-129	1.95903e-126
NAALAD2	3.43024	1.03153	6.703	1.32848	-3.27276	-29.1006	1.0436e-128	6.57989e-126
TNS1	11.2999	0.914776	14.1874	1.17235	-2.88756	-28.973	6.54348e-128	3.9834e-125
PPP1R12B	9.65665	0.78905	11.985	0.594349	-2.32835	-28.9303	1.20991e-127	7.11992e-125
MYOM1	4.82282	1.27411	8.76573	1.52289	-3.94291	-28.7773	1.09341e-126	6.22678e-124
FAM13A	8.34171	0.905717	11.0361	0.802348	-2.69437	-28.7675	1.25877e-126	6.9445e-124
ANGPT4	0.982836	0.947106	4.02622	1.36912	-3.04339	-28.762	1.3624e-126	7.28845e-124
PAPPA2	1.38958	1.16532	5.00347	1.41925	-3.61389	-28.7422	1.81119e-126	9.40433e-124
AQPEP	2.39543	1.43848	7.15903	2.37101	-4.7636	-28.6837	4.20359e-126	2.12029e-123
TRPM3	0.610977	0.841753	3.22132	1.0371	-2.61034	-28.6649	5.50559e-126	2.69988e-123
GABRD	5.95465	1.18629	2.44081	1.05554	3.51384	28.6453	7.30459e-126	3.48528e-123
CD300LG	3.42414	2.40549	10.2835	1.2126	-6.85941	-28.5967	1.46879e-125	6.82371e-123
HEPACAM	1.59359	1.75203	6.9234	1.96188	-5.32981	-28.5941	1.52445e-125	6.90067e-123
SDPR	6.50154	1.73244	11.3977	0.858514	-4.89618	-28.354	4.82202e-124	2.1282e-121
IQGAP3	9.00647	1.30105	5.14165	1.30641	3.86482	28.3398	5.91534e-124	2.54706e-121
FHL1	8.85922	1.43146	13.301	1.91875	-4.4418	-28.248	2.21644e-123	9.31645e-121
HEPN1	1.51176	1.67232	6.59049	2.01409	-5.07872	-28.2108	3.78359e-123	1.55338e-120
ITIH5	7.72326	1.5343	12.1409	1.23467	-4.41762	-28.1138	1.52663e-122	6.12525e-120
PAMR1	6.07379	1.4909	10.26	0.830675	-4.18625	-28.0415	4.32096e-122	1.69516e-119
ABCA10	3.45089	1.73892	8.2965	0.824356	-4.84561	-27.997	8.20236e-122	3.14792e-119
SCARA5	3.4493	2.49044	10.4165	1.38842	-6.96719	-27.9465	1.6941e-121	6.36333e-119
ACVR1C	4.18245	1.70211	9.36468	2.30216	-5.18224	-27.6686	9.22022e-120	3.39112e-117
SPC25	6.79222	1.07515	3.65518	1.13168	3.13704	27.6576	1.07931e-119	3.88859e-117
GPR146	6.30295	0.930389	9.06744	1.11603	-2.76449	-27.6003	2.46081e-119	8.68864e-117
ADH1A	1.6522	1.78772	6.94963	2.12683	-5.29743	-27.5847	3.07921e-119	1.06589e-116
PDE2A	6.75201	1.24678	10.2445	0.949151	-3.49252	-27.4685	1.63618e-118	5.55484e-116
CDC25C	6.37985	1.30282	2.64264	1.27164	3.73721	27.4623	1.78822e-118	5.95645e-116
KCNIP2	4.86554	1.72132	10.0753	2.35047	-5.20973	-27.4503	2.12493e-118	6.82063e-116
UHRF1	8.37665	1.20929	4.78686	1.49192	3.58979	27.451	2.10582e-118	6.82063e-116
CAV2	8.76075	1.09002	11.8476	0.958949	-3.08681	-27.4143	3.56933e-118	1.12523e-115
NKAPL	2.5595	0.992763	5.32903	0.754034	-2.76954	-27.3501	8.96816e-118	2.77761e-115
RYR3	3.24036	1.3847	7.05541	0.882662	-3.81505	-27.3342	1.12833e-117	3.43442e-115
NPR1	6.9395	1.24284	10.5329	1.3597	-3.59341	-27.263	3.13803e-117	9.38963e-115
MAP1LC3C	2.02647	1.40747	6.05234	1.44103	-4.02586	-27.223	5.57758e-117	1.64111e-114
PKHD1L1	1.81802	1.46938	6.15776	1.86023	-4.33974	-27.1888	9.10827e-117	2.63602e-114
HIF3A	2.6706	1.9179	7.89733	1.10793	-5.22673	-27.1782	1.06126e-116	3.02185e-114
PYCR1	11.1554	0.84538	8.57842	1.25268	2.57693	27.1201	2.44324e-116	6.8465e-114
BTNL9	5.96243	1.62868	10.4584	1.24532	-4.49596	-27.0672	5.22407e-116	1.44103e-113
SIK2	8.99361	0.775554	11.2976	1.05112	-2.30402	-26.9555	2.59816e-115	7.0566e-113
ASF1B	8.77613	1.04482	5.82191	1.07051	2.95422	26.897	6.01915e-115	1.61003e-112
LRRTM2	2.75575	1.15749	5.90134	0.791276	-3.14559	-26.845	1.27022e-114	3.34694e-112
TSLP	2.34642	1.57221	6.50096	0.556187	-4.15455	-26.7323	6.40679e-114	1.66332e-111
LPL	8.47133	1.70674	13.3545	1.99556	-4.88312	-26.7099	8.83182e-114	2.25967e-111
KLB	4.31862	1.4001	8.60802	2.26389	-4.28939	-26.6765	1.42608e-113	3.57719e-111
UBE2C	8.80396	1.45708	4.74608	1.41727	4.05788	26.6759	1.43866e-113	3.57719e-111
KLHL33	0.620805	0.692664	2.79243	1.21072	-2.17162	-26.6622	1.75012e-113	4.2912e-111
EPB42	0.655605	0.976648	4.12031	2.38387	-3.46471	-26.5992	4.32538e-113	1.04603e-110
ABCD2	3.16498	1.49102	7.55105	2.07681	-4.38608	-26.5645	7.11284e-113	1.69689e-110
TNXB	8.09713	1.72249	12.7597	1.30383	-4.66253	-26.5628	7.28547e-113	1.7149e-110
LRRC2	2.80278	1.37542	6.52764	1.0585	-3.72486	-26.5368	1.05878e-112	2.45944e-110
CRHBP	2.38043	1.1608	5.90188	1.85561	-3.52145	-26.492	2.01313e-112	4.61556e-110
HSD17B6	6.47143	1.10653	3.46147	0.919316	3.00996	26.4765	2.51384e-112	5.68965e-110
C13orf36	0.575081	0.874852	3.34657	1.62747	-2.77149	-26.43	4.89764e-112	1.09447e-109
HJURP	7.70918	1.24763	4.28066	1.17706	3.42852	26.4112	6.41078e-112	1.4147e-109
PALMD	8.40958	1.15258	11.5438	0.984936	-3.13421	-26.4009	7.43359e-112	1.62015e-109
ADAMTS5	7.61775	1.37424	11.2249	0.635585	-3.60713	-26.3861	9.18669e-112	1.97783e-109
SLC2A4	3.96709	1.57539	8.37983	1.74021	-4.41274	-26.3806	9.9379e-112	2.11378e-109
B3GALT1	1.01475	1.09082	4.11983	1.32977	-3.10507	-26.3752	1.07457e-111	2.2584e-109
SPTBN1	12.3549	0.678318	14.3137	0.889259	-1.9588	-26.3666	1.21513e-111	2.52375e-109
SORBS1	9.57876	1.20629	13.025	1.50887	-3.44627	-26.3533	1.47119e-111	3.02004e-109
TNMD	1.93796	1.91051	7.13904	1.69202	-5.20108	-26.3511	1.5179e-111	3.08011e-109
DMD	7.17966	1.56228	11.2571	0.624533	-4.07744	-26.3387	1.81379e-111	3.6387e-109
ARHGAP20	5.07439	1.34571	8.63887	0.821689	-3.56448	-26.3377	1.83943e-111	3.64868e-109
PYGM	3.18549	1.23325	6.8521	1.8669	-3.66661	-26.3313	2.01562e-111	3.95375e-109
CCDC69	7.98552	1.11754	11.1517	1.3416	-3.16615	-26.3216	2.31818e-111	4.49728e-109
NUF2	7.80693	1.37202	4.07302	1.2508	3.73391	26.2571	5.83765e-111	1.12019e-108
KIAA0408	1.73694	2.05224	7.45443	2.25968	-5.7175	-26.2553	5.98901e-111	1.13688e-108
STAB2	1.69883	1.5089	5.87487	1.58442	-4.17604	-26.2533	6.16738e-111	1.15829e-108
DPP6	1.54057	1.46497	5.48537	1.21344	-3.9448	-26.2258	9.14985e-111	1.70033e-108
USP44	1.86262	1.1957	5.01214	0.757849	-3.14952	-26.136	3.31172e-110	6.09012e-108
HSPB6	7.2343	1.74064	12.0203	1.81534	-4.78601	-26.1091	4.87015e-110	8.86367e-108
MASP1	2.26315	1.66816	6.73999	1.40924	-4.47684	-26.0936	6.08006e-110	1.09528e-107
EBF1	7.19165	1.14667	10.3513	1.21977	-3.15962	-26.0837	7.00375e-110	1.24893e-107
LEPR	7.25084	1.26627	10.6295	1.00328	-3.37865	-26.0817	7.21056e-110	1.27295e-107
ASPA	2.66789	1.36557	6.39594	1.38992	-3.72805	-26.0016	2.27e-109	3.96777e-107
KIF20A	8.67442	1.31685	5.03817	1.46651	3.63625	25.9706	3.53651e-109	6.12094e-107
UBE2T	8.40972	1.14339	5.38582	0.853723	3.0239	25.9679	3.67644e-109	6.30134e-107
PRRG3	1.08373	1.04074	3.85251	0.84826	-2.76878	-25.9355	5.84397e-109	9.92014e-107
PBK	7.73194	1.28223	4.20021	1.42284	3.53172	25.9184	7.47361e-109	1.25656e-106
ABCB5	1.93495	1.62986	6.29975	1.47799	-4.3648	-25.8565	1.81147e-108	3.01695e-106
RDH5	4.67863	1.4941	8.89261	1.95029	-4.21398	-25.8131	3.37335e-108	5.5657e-106
NIPSNAP3B	4.49218	1.0013	7.28171	1.22177	-2.78952	-25.8055	3.7608e-108	6.14751e-106
C18orf34	2.29302	1.43167	6.02999	0.981256	-3.73697	-25.7871	4.89086e-108	7.92139e-106
KLHL29	5.69789	1.30942	9.03437	0.512871	-3.33648	-25.7209	1.26005e-107	2.02226e-105
TPX2	10.0727	1.24138	6.80855	0.981057	3.26417	25.7078	1.51973e-107	2.41706e-105
TMEM220	5.32163	1.09531	8.10504	0.400935	-2.78341	-25.6799	2.26464e-107	3.56964e-105
LOC286367	4.63567	1.06607	7.44166	0.862552	-2.80599	-25.6769	2.36584e-107	3.69615e-105
GSN	12.7588	0.878744	15.1721	1.01304	-2.41338	-25.6751	2.4267e-107	3.75798e-105
AOC3	9.01044	1.33371	12.7263	1.71046	-3.71583	-25.5834	9.00715e-107	1.38271e-104
SLC7A14	0.543622	0.826213	2.88419	1.15395	-2.34057	-25.5448	1.56368e-106	2.37976e-104
LEP	3.46269	2.8349	11.0884	2.95988	-7.62574	-25.5441	1.57935e-106	2.38306e-104
NUSAP1	9.40726	1.11664	6.41707	1.12223	2.9902	25.5394	1.68906e-106	2.527e-104
SPRY2	7.42962	1.18167	10.4094	0.384102	-2.97974	-25.536	1.77274e-106	2.62992e-104
HMMR	7.78404	1.17865	4.58744	1.30511	3.1966	25.526	2.04481e-106	3.00826e-104
TROAP	7.48337	1.38845	3.82471	1.24347	3.65866	25.4712	4.47702e-106	6.532e-104
LOC90586	1.05288	0.773326	3.31698	1.25217	-2.2641	-25.4599	5.26191e-106	7.61424e-104
ADCYAP1R1	1.39299	1.30414	4.86686	1.31013	-3.47387	-25.4112	1.05474e-105	1.51385e-103
TK1	9.91696	1.15287	6.87453	1.10142	3.04243	25.3243	3.64941e-105	5.19569e-103
ITPRIPL1	3.6905	1.29363	6.95812	0.692493	-3.26762	-25.2632	8.72898e-105	1.23281e-102
ATOH8	4.7319	1.56455	8.73117	1.07241	-3.99926	-25.255	9.81348e-105	1.37498e-102
DLGAP5	7.86919	1.31564	4.32719	1.49279	3.542	25.2485	1.07612e-104	1.4959e-102
WDR62	7.47913	1.14317	4.43026	1.2428	3.04886	25.1686	3.36603e-104	4.64249e-102
C16orf59	6.84951	1.10622	3.95387	1.04303	2.89564	25.1552	4.07692e-104	5.57937e-102
CXCL2	3.72284	1.95864	8.66588	1.15556	-4.94304	-25.144	4.78262e-104	6.4948e-102
PPAP2B	9.98151	0.865953	12.1859	0.590603	-2.20435	-25.1342	5.50053e-104	7.4127e-102
CDK1	9.41675	1.13265	6.51045	0.884044	2.9063	25.1086	7.92535e-104	1.05996e-101
LOC728264	6.83654	1.48906	10.6671	1.21483	-3.83056	-25.0882	1.05991e-103	1.40689e-101
CKS2	9.07751	0.923373	6.67707	0.851678	2.40043	25.0345	2.27725e-103	3.00019e-101
CLEC4G	0.855302	1.09099	3.9587	1.69418	-3.10339	-25.0281	2.49681e-103	3.26508e-101
PALM2-AKAP2	9.45588	0.89	11.7898	0.906605	-2.33392	-24.9563	6.9449e-103	9.01509e-101
KIF18B	7.20924	1.36353	3.63419	1.39495	3.57505	24.9553	7.05078e-103	9.08573e-101
CEP68	9.41809	0.525553	10.7432	0.335293	-1.32508	-24.9327	9.72945e-103	1.24466e-100
PPAPDC1A	6.46901	1.97143	1.51849	1.308	4.95052	24.8633	2.61437e-102	3.32044e-100
CFL2	8.14152	0.721839	10.0928	0.916201	-1.95126	-24.8405	3.61534e-102	4.55894e-100
PLK1	8.64185	1.31463	5.29908	1.0511	3.34277	24.8379	3.75425e-102	4.70053e-100
CAT	10.5618	0.675835	12.4193	0.937963	-1.85751	-24.8021	6.2485e-102	7.76838e-100
MELK	7.90832	1.37975	4.32058	1.39132	3.58774	24.7957	6.8418e-102	8.44651e-100
HSPB7	5.31714	1.54582	9.67977	2.42274	-4.36263	-24.7809	8.45146e-102	1.03612e-99
C14orf139	6.07117	1.14029	9.12019	1.39174	-3.04902	-24.7718	9.61367e-102	1.17048e-99
CD34	10.0576	0.847362	12.2528	0.834033	-2.19514	-24.7565	1.19487e-101	1.44481e-99
ABCA9	5.15594	1.90837	9.90047	1.1804	-4.74454	-24.7116	2.26417e-101	2.71916e-99
KCNJ16	1.84276	1.96676	6.78303	1.47667	-4.94027	-24.6667	4.29338e-101	5.12131e-99
ZWINT	9.37766	0.9635	6.91868	0.874882	2.45899	24.6206	8.27169e-101	9.80057e-99
CEP55	8.2177	1.24571	5.03348	1.15334	3.18423	24.6185	8.52182e-101	1.00296e-98
RRM2	9.52127	1.2957	6.13656	1.42723	3.38471	24.6085	9.81632e-101	1.14766e-98
C1QTNF9	2.11913	1.26204	5.26353	0.86703	-3.1444	-24.6071	1.0012e-100	1.16284e-98
CLEC4GP1	0.598429	0.933971	3.17538	1.37972	-2.57695	-24.571	1.67458e-100	1.93222e-98
DTL	8.88088	1.1643	5.88381	1.16755	2.99707	24.5587	1.99492e-100	2.28691e-98
CCDC50	10.1635	0.563757	11.6074	0.536431	-1.44396	-24.5331	2.87045e-100	3.26936e-98
SLC35A2	10.0661	0.491857	8.82754	0.391637	1.23857	24.5182	3.54606e-100	4.01295e-98
TGFBR2	10.5801	1.05952	13.2069	0.709639	-2.6268	-24.5175	3.57953e-100	4.02503e-98
SCN3A	2.90406	1.66666	6.99323	0.988573	-4.08917	-24.4358	1.14341e-99	1.27758e-97
CLEC3B	7.1199	1.38972	10.72	1.53123	-3.60011	-24.4046	1.78196e-99	1.97854e-97
MRAP	1.5644	2.07913	7.16937	2.87634	-5.60497	-24.3849	2.35524e-99	2.59871e-97
BUB1	8.40264	1.29341	5.11978	1.2292	3.28286	24.3749	2.7164e-99	2.9786e-97
LDB2	7.68406	0.957076	10.0478	0.664172	-2.36369	-24.3644	3.15374e-99	3.4368e-97
H2AFY	12.2549	0.455788	11.1283	0.301474	1.12662	24.3634	3.19629e-99	3.4618e-97
FRMD1	1.3995	1.30682	5.06313	2.13336	-3.66362	-24.3458	4.10441e-99	4.41824e-97
SH3D19	10.0407	0.773736	12.0252	0.806369	-1.98452	-24.3262	5.42017e-99	5.79926e-97
ALDH1L1	3.52653	2.23275	9.11092	1.92375	-5.58439	-24.2772	1.08726e-98	1.1563e-96
CENPM	7.0195	1.14027	4.01377	1.43903	3.00573	24.2739	1.13945e-98	1.20454e-96
NACC1	11.0218	0.557947	9.60816	0.530064	1.41364	24.2708	1.19016e-98	1.25066e-96
POC1A	7.72772	0.813727	5.7099	0.629172	2.01782	24.2653	1.28721e-98	1.34464e-96
ANXA1	10.8555	1.16113	13.6894	0.711692	-2.83389	-24.2585	1.41724e-98	1.47177e-96
ENPP2	8.32709	1.42443	11.8152	0.949983	-3.4881	-24.2325	2.04997e-98	2.11638e-96
ADRB2	4.95124	1.3842	8.32883	0.87553	-3.37759	-24.2188	2.48953e-98	2.55524e-96
FXYD1	3.67201	2.117	8.76278	0.949169	-5.09077	-24.203	3.1168e-98	3.18057e-96
DST	11.4613	1.15669	14.2866	0.7554	-2.8253	-24.1944	3.51644e-98	3.56777e-96
KLHL31	4.8383	1.21368	8.11134	1.74209	-3.27304	-24.1864	3.94248e-98	3.97717e-96
GIMAP8	7.51267	0.931067	9.82349	0.762273	-2.31082	-24.1805	4.28774e-98	4.3009e-96
CCNB2	8.35789	1.24992	5.19817	1.2341	3.15972	24.1666	5.21696e-98	5.20341e-96
COL25A1	2.54684	1.34547	5.86344	1.03469	-3.3166	-24.155	6.15271e-98	6.10224e-96
AQP7	3.59174	2.46229	9.70495	2.07703	-6.1132	-24.1477	6.8267e-98	6.73288e-96
KIFC1	8.9242	1.19473	5.90892	1.17196	3.01528	24.1449	7.10274e-98	6.96621e-96
LIFR	8.96326	1.28384	12.0556	0.652666	-3.0923	-24.1364	8.00693e-98	7.80963e-96
PPARG	6.84408	1.30326	10.2025	1.49877	-3.35843	-24.1161	1.06763e-97	1.0356e-95
GIPC2	4.02435	1.45958	7.51537	0.624245	-3.49102	-24.0969	1.40176e-97	1.35227e-95
CDKN3	7.075	1.14382	4.21995	1.03697	2.85505	24.0911	1.5232e-97	1.46144e-95
ACACB	8.52533	1.36346	12.0169	1.53192	-3.49153	-24.0532	2.60377e-97	2.4847e-95
ACADL	2.10904	1.96021	6.97201	1.73662	-4.86297	-24.013	4.60387e-97	4.36972e-95
CCDC64	8.53511	1.15036	5.52616	1.47991	3.00895	24.0001	5.52498e-97	5.21593e-95
CYP3A4	0.47699	0.574998	2.20442	1.20403	-1.72743	-23.9984	5.65874e-97	5.31379e-95
NPY2R	1.25489	2.11742	6.73813	2.589	-5.48324	-23.995	5.9365e-97	5.54513e-95
KIF2C	8.46962	1.3035	5.21303	1.24868	3.25659	23.9709	8.35532e-97	7.76341e-95
FOXM1	9.42311	1.32994	6.13027	1.17825	3.29283	23.9582	1.00082e-96	9.2505e-95
SYNM	9.08677	1.85976	13.526	0.919625	-4.43918	-23.9504	1.11776e-96	1.02776e-94
CCNB1	9.71162	0.940916	7.43167	0.641226	2.27995	23.9313	1.4647e-96	1.33978e-94
TOP2A	11.028	1.39699	7.50421	1.48479	3.52381	23.8861	2.77691e-96	2.52699e-94
KL	4.60312	1.31404	7.74115	0.713746	-3.13803	-23.871	3.43486e-96	3.10969e-94
ACSM5	3.87353	1.4404	7.58189	1.77853	-3.70836	-23.8086	8.30295e-96	7.47858e-94
BUB1B	8.23677	1.19571	5.22825	1.27925	3.00852	23.8001	9.37525e-96	8.40156e-94
PRR19	5.98822	0.753406	3.99876	1.05383	1.98946	23.7973	9.74646e-96	8.6901e-94
FAM180B	1.38627	1.35005	4.98369	1.97742	-3.59742	-23.7895	1.08846e-95	9.65615e-94
NDC80	7.67729	1.27332	4.52589	1.20797	3.1514	23.7722	1.38952e-95	1.22653e-93
EBF3	5.56773	1.27009	8.68274	1.10665	-3.11501	-23.7703	1.42754e-95	1.25382e-93
C14orf180	2.01157	2.17209	7.52752	2.50138	-5.51595	-23.7685	1.4645e-95	1.27992e-93
ASPM	8.6924	1.40467	5.19658	1.40072	3.49582	23.7655	1.528e-95	1.32883e-93
CCDC141	2.175	1.05998	4.9149	1.34881	-2.7399	-23.7638	1.56462e-95	1.34791e-93
LOC55908	1.01771	1.16521	4.36998	2.23544	-3.35227	-23.7638	1.56521e-95	1.34791e-93
MAZ	12.353	0.591838	10.9156	0.454853	1.43736	23.7442	2.06629e-95	1.77079e-93
COL6A6	3.96513	1.90141	8.5307	1.29448	-4.56558	-23.7367	2.29502e-95	1.95731e-93
SLC17A7	3.30281	1.35363	6.58617	1.06302	-3.28337	-23.7294	2.545e-95	2.16007e-93
IGFBP6	7.05427	1.31157	10.2713	1.18993	-3.21703	-23.676	5.41207e-95	4.57152e-93
SPHKAP	1.19989	1.74869	5.69753	2.22585	-4.49764	-23.6562	7.15832e-95	6.01776e-93
GPX3	9.54991	1.45118	13.2725	1.8205	-3.72255	-23.6542	7.36716e-95	6.16397e-93
PAQR4	10.0015	1.04918	7.48618	0.74594	2.51537	23.6185	1.21981e-94	1.01578e-92
DACT2	1.99822	1.76888	6.18759	1.08642	-4.18937	-23.5483	3.2871e-94	2.72443e-92
GYS2	0.608312	0.930381	3.62425	2.42704	-3.01593	-23.5466	3.36605e-94	2.77684e-92
RAG1AP1	10.8007	0.782514	8.95109	0.454037	1.84965	23.5344	3.9966e-94	3.28168e-92
TRDN	1.08188	1.38163	5.00807	2.64193	-3.92619	-23.5028	6.24865e-94	5.10712e-92
CXorf36	8.34793	0.940994	10.6076	0.736582	-2.25971	-23.485	8.03153e-94	6.53404e-92
LMOD1	8.51043	1.30345	11.5547	0.600973	-3.04429	-23.4791	8.73157e-94	7.07097e-92
TMEM132C	3.34698	2.46199	9.19884	1.72193	-5.85186	-23.4591	1.1563e-93	9.32112e-92
BIRC5	8.10622	1.49011	4.40527	1.6185	3.70095	23.4484	1.34584e-93	1.07998e-91
PTTG1	8.29034	1.24375	5.31107	0.976319	2.97927	23.4323	1.68882e-93	1.34907e-91
MYH1	0.825359	1.10024	4.19012	2.55965	-3.36476	-23.4315	1.70768e-93	1.35799e-91
CLCA4	1.29802	1.61972	5.43814	2.12834	-4.14013	-23.3646	4.38256e-93	3.46949e-91
PDK4	8.82615	1.7192	12.9512	1.43172	-4.12505	-23.3604	4.65086e-93	3.66546e-91
FOXO1	8.81233	0.906602	10.9651	0.655971	-2.15274	-23.357	4.8827e-93	3.83108e-91
NMUR1	2.84403	1.32598	6.20192	1.66927	-3.35788	-23.3346	6.69506e-93	5.22985e-91
CENPF	10.6963	1.23362	7.7307	1.06672	2.96561	23.3157	8.73875e-93	6.79621e-91
NCAPG	8.39488	1.16837	5.56097	1.10716	2.83391	23.2979	1.12209e-92	8.68833e-91
HAGHL	7.09313	1.57218	3.3474	1.26605	3.74573	23.2626	1.84406e-92	1.42162e-90
EXO1	7.47678	1.41463	4.07023	1.28308	3.40655	23.2469	2.30121e-92	1.76633e-90
LIPE	7.47515	1.68491	11.7364	2.15601	-4.26128	-23.2378	2.61678e-92	1.99986e-90
RELN	3.41978	2.2032	8.52976	1.19999	-5.10998	-23.1906	5.08181e-92	3.867e-90
MAMDC2	5.92309	1.73177	9.88856	0.596949	-3.96547	-23.1769	6.1677e-92	4.67316e-90
C2orf88	4.97531	1.4732	8.37839	0.739918	-3.40308	-23.1614	7.66473e-92	5.78261e-90
ANKRD53	2.88704	1.2124	5.83629	1.24271	-2.94925	-23.1442	9.75654e-92	7.32944e-90
GPIHBP1	5.08725	1.72678	9.11477	1.11804	-4.02752	-23.1244	1.29058e-91	9.65417e-90
TMC2	1.19999	0.861244	3.49152	1.40684	-2.29153	-23.0882	2.14667e-91	1.59904e-89
TPO	2.58293	1.44352	5.94814	0.952731	-3.36521	-23.0841	2.27284e-91	1.68591e-89
NEIL3	5.43832	1.37689	2.1681	1.16669	3.27022	23.0826	2.32212e-91	1.71526e-89
HAS3	5.89516	1.47466	9.47808	1.54493	-3.58292	-23.0543	3.45668e-91	2.54267e-89
GPRASP1	6.61983	1.12316	9.19435	0.509643	-2.57452	-23.0487	3.73712e-91	2.73756e-89
CDCA8	8.32214	1.11627	5.70034	0.840356	2.62181	23.0471	3.82539e-91	2.79064e-89
TXNIP	13.0302	0.967739	15.309	0.752627	-2.27874	-23.0416	4.13238e-91	3.00218e-89
OIP5	5.99911	1.06935	3.44584	0.978534	2.55327	23.0197	5.62139e-91	4.06721e-89
PDE1C	3.27044	1.69217	7.27342	1.4206	-4.00298	-23.0142	6.06997e-91	4.37385e-89
SKA3	7.12975	1.20497	4.24786	1.12951	2.88189	23.0019	7.21291e-91	5.17629e-89
COL11A1	10.86	2.65341	4.72924	1.61182	6.13072	22.99	8.53275e-91	6.09867e-89
MME	8.09368	1.9468	12.514	0.668269	-4.42034	-22.9851	9.1312e-91	6.50009e-89
GPR109A	5.10081	1.37202	8.45218	1.52751	-3.35137	-22.9755	1.04531e-90	7.41122e-89
NMT2	7.73319	0.914915	9.90205	0.792694	-2.16886	-22.9747	1.05694e-90	7.46366e-89
KCNB1	2.7002	1.75237	6.7877	1.2612	-4.0875	-22.9737	1.0725e-90	7.5434e-89
PAK3	2.13285	1.54299	5.78008	1.31653	-3.64723	-22.96	1.29912e-90	9.10108e-89
ALDH1A2	4.34885	1.80291	8.45666	0.813248	-4.10782	-22.9261	2.09278e-90	1.46032e-88
TSPAN7	7.19608	1.3893	10.3812	0.754616	-3.18514	-22.9183	2.33308e-90	1.62158e-88
C10orf90	1.93171	1.87555	6.26499	1.20642	-4.33328	-22.9161	2.40863e-90	1.66753e-88
SCN4A	4.25189	1.59339	8.02999	1.43753	-3.7781	-22.9051	2.80916e-90	1.93722e-88
IGSF10	5.49216	1.88389	9.79231	0.938409	-4.30015	-22.8976	3.12022e-90	2.14336e-88
CD36	9.02976	2.17254	14.1016	1.66652	-5.07181	-22.8886	3.54116e-90	2.42309e-88
SMYD1	2.14829	2.18211	7.60097	2.8439	-5.45268	-22.8816	3.90694e-90	2.66305e-88
CDH20	1.1048	1.01512	3.87154	1.85547	-2.76674	-22.8756	4.24813e-90	2.88448e-88
GDF10	3.18713	1.98033	7.76742	1.3382	-4.58029	-22.8753	4.26598e-90	2.8855e-88
FAM196B	2.51514	1.83271	6.99952	2.12859	-4.48438	-22.8686	4.68552e-90	3.15718e-88
ANGPTL1	4.92344	1.68906	8.83948	1.19814	-3.91603	-22.8569	5.52637e-90	3.7096e-88
CHRDL1	6.25754	2.59725	12.2094	1.53268	-5.95188	-22.834	7.61416e-90	5.09168e-88
MRAS	8.9437	1.08501	11.4786	0.868918	-2.53488	-22.8117	1.04159e-89	6.93894e-88
GNAI1	7.49966	1.12908	10.1702	1.05802	-2.67053	-22.7462	2.60602e-89	1.72958e-87
LRRC70	4.9006	1.02135	7.28044	0.820534	-2.37985	-22.7428	2.73536e-89	1.80862e-87
SLC19A3	4.34749	2.44626	10.1703	2.4552	-5.82277	-22.7191	3.81347e-89	2.51205e-87
C7orf41	9.57941	0.998051	11.9701	1.05551	-2.39065	-22.6875	5.93676e-89	3.89619e-87
ITGA7	7.27729	1.4958	10.8588	1.58834	-3.58153	-22.678	6.78219e-89	4.43455e-87
CAPN11	3.18938	1.44676	6.49571	0.921714	-3.30633	-22.6748	7.0917e-89	4.61981e-87
LHFP	9.05736	1.01285	11.3741	0.653658	-2.3167	-22.6664	7.97195e-89	5.17415e-87
ADH1C	2.9312	2.25096	8.01408	1.12115	-5.08289	-22.654	9.48547e-89	6.13393e-87
SLC7A10	2.24479	1.97758	7.17939	2.69116	-4.9346	-22.6494	1.01173e-88	6.51862e-87
LRRN4CL	4.67391	1.68358	8.52977	1.13953	-3.85586	-22.647	1.04672e-88	6.71959e-87
DNASE1L3	2.85109	1.79816	6.93929	1.06734	-4.08821	-22.644	1.09184e-88	6.98379e-87
KCNA2	0.79112	0.898155	3.14786	1.49763	-2.35674	-22.6406	1.14512e-88	7.29815e-87
SCN4B	6.92362	1.36762	9.97837	0.437197	-3.05475	-22.6294	1.33895e-88	8.50279e-87
BMX	3.2206	1.68875	7.0549	1.0009	-3.8343	-22.6142	1.65594e-88	1.04781e-86
GTSE1	7.36942	1.2498	4.4662	1.04051	2.90322	22.6098	1.76097e-88	1.11029e-86
FZD4	9.78882	0.96653	12.2	1.32742	-2.4112	-22.5844	2.51397e-88	1.57942e-86
GNG11	8.64246	0.94448	10.8506	0.856097	-2.20815	-22.5575	3.65851e-88	2.29033e-86
SLC16A7	3.91988	1.42571	7.38858	1.74607	-3.4687	-22.5318	5.24477e-88	3.27177e-86
ANLN	9.13802	1.32656	6.05199	1.16452	3.08602	22.5313	5.27968e-88	3.28195e-86
EPR1	8.06231	1.51854	4.42968	1.69764	3.63263	22.4888	9.56762e-88	5.92656e-86
PLIN1	6.65655	2.76067	13.091	2.53749	-6.43448	-22.4768	1.13145e-87	6.98412e-86
CDC20	8.83248	1.4023	5.54607	1.35206	3.28641	22.4709	1.22785e-87	7.5528e-86
TRHDE	1.6754	1.49483	5.50989	2.37241	-3.83449	-22.4493	1.66035e-87	1.01777e-85
FMO2	6.9793	2.166	11.7889	0.803731	-4.80959	-22.4481	1.68776e-87	1.031e-85
SVEP1	8.19924	1.57354	11.825	1.3095	-3.6258	-22.4337	2.06376e-87	1.25633e-85
SLC22A3	3.96151	1.6858	7.79443	1.18634	-3.83293	-22.4269	2.27077e-87	1.3776e-85
FAM107A	5.90822	1.86518	10.0812	0.953225	-4.17297	-22.423	2.39946e-87	1.45069e-85
CCL16	0.704426	0.867394	2.75783	0.915386	-2.0534	-22.4219	2.4345e-87	1.46685e-85
METTL7A	10.0954	0.91314	12.1478	0.527642	-2.05241	-22.3931	3.64151e-87	2.18664e-85
ESR2	2.75217	0.830345	4.86756	1.29272	-2.1154	-22.3894	3.83153e-87	2.29294e-85
CKAP2L	6.93666	1.32887	3.86982	1.16088	3.06683	22.363	5.54423e-87	3.30668e-85
KY	2.53824	1.76486	6.70721	1.88697	-4.16896	-22.3543	6.25442e-87	3.71769e-85
SOX12	10.058	0.788745	8.24657	0.657551	1.81143	22.3291	8.89938e-87	5.27214e-85
EPAS1	11.2431	0.873563	13.2862	0.868965	-2.04308	-22.3233	9.6397e-87	5.67264e-85
COMP	10.5306	2.1444	5.51613	2.15411	5.01444	22.3158	1.07123e-86	6.28289e-85
CYYR1	8.08404	1.07573	10.4631	0.42394	-2.37907	-22.3149	1.08384e-86	6.33579e-85
RBP4	5.10943	2.46353	10.858	2.44	-5.74853	-22.309	1.17762e-86	6.86127e-85
OVCH2	0.70244	1.09751	3.57902	1.92027	-2.87658	-22.3042	1.25815e-86	7.30636e-85
ESM1	7.47701	1.2807	4.5204	1.15263	2.95661	22.3019	1.29903e-86	7.51907e-85
ACSS2	9.64444	0.606283	11.1596	0.885873	-1.5152	-22.2838	1.67211e-86	9.64689e-85
GPD1	5.98495	2.79828	12.4177	2.44913	-6.43279	-22.2813	1.73344e-86	9.96812e-85
MKI67	10.4729	1.28268	7.46966	1.32823	3.00319	22.2479	2.75949e-86	1.58169e-84
RNF150	5.02936	1.51207	8.44656	1.10304	-3.4172	-22.235	3.30309e-86	1.88715e-84
GNAL	5.0472	1.41329	8.17442	0.683065	-3.12722	-22.2138	4.43884e-86	2.52785e-84
AQP1	11.1583	1.13054	13.6602	0.544799	-2.50198	-22.2129	4.49465e-86	2.5514e-84
GGTA1	6.68572	1.17155	9.30788	0.739745	-2.62216	-22.2121	4.5444e-86	2.57137e-84
AURKA	8.46597	1.19595	5.80139	0.690828	2.66458	22.2094	4.72078e-86	2.66264e-84
KLF15	4.493	1.6365	8.20268	1.2664	-3.70968	-22.2062	4.93583e-86	2.77507e-84
ITM2A	7.67973	1.48602	10.9334	0.460933	-3.25371	-22.1942	5.83612e-86	3.27082e-84
SHE	6.93533	1.09765	9.4074	0.77958	-2.47207	-22.1903	6.16083e-86	3.44188e-84
CDCA3	7.43937	1.22205	4.6805	0.902466	2.75886	22.1869	6.45661e-86	3.59574e-84
ATP1A2	4.58222	2.34562	9.86918	1.72193	-5.28696	-22.1721	7.93604e-86	4.40575e-84
KIF23	8.70224	1.0818	6.20811	1.01365	2.49413	22.171	8.06152e-86	4.46138e-84
ANGPT1	5.51961	1.40277	8.76216	1.36411	-3.24255	-22.1411	1.22105e-85	6.73636e-84
C3orf64	8.43777	0.728161	10.0447	0.343771	-1.6069	-22.1379	1.27686e-85	7.02235e-84
GPRIN1	7.33941	1.13995	4.79151	0.745719	2.5479	22.1367	1.29827e-85	7.11789e-84
S1PR1	8.35889	1.07829	10.7961	0.831854	-2.43722	-22.1362	1.30876e-85	7.15322e-84
HOXA4	4.47468	1.32637	7.37905	0.484125	-2.90436	-22.1354	1.32297e-85	7.20857e-84
CA3	3.62816	2.06266	8.39375	2.01297	-4.76559	-22.1268	1.49054e-85	8.08942e-84
OXTR	6.87336	1.68292	11.2163	2.87475	-4.34292	-22.1267	1.4938e-85	8.08942e-84
CDCA5	8.6152	1.22088	5.86398	0.917504	2.75122	22.1183	1.67847e-85	9.0617e-84
BMP8A	7.90095	1.13774	5.36561	0.7246	2.53535	22.1037	2.05722e-85	1.10726e-83
TMEM195	1.4366	1.26262	4.40335	1.43017	-2.96675	-22.0409	4.92673e-85	2.64366e-83
PLSCR4	8.28788	1.08772	10.6969	0.657825	-2.40897	-22.0252	6.12624e-85	3.27735e-83
CTXN1	8.55714	1.26772	5.63857	1.27139	2.91856	21.9665	1.38548e-84	7.38951e-83
VIT	4.15062	2.1444	8.81185	0.841565	-4.66123	-21.9496	1.75332e-84	9.32323e-83
PLIN4	7.89472	2.64373	13.8936	2.36104	-5.99887	-21.948	1.79112e-84	9.49564e-83
ABCA8	5.2335	2.47946	10.6654	1.28854	-5.43186	-21.9458	1.84817e-84	9.76872e-83
LOC201651	0.631447	0.747812	2.43945	1.01258	-1.808	-21.939	2.03078e-84	1.07019e-82
GRIN2B	0.605951	0.94289	2.8532	1.19863	-2.24725	-21.9108	3.0055e-84	1.57914e-82
HS3ST4	1.34909	1.86707	5.71391	2.13109	-4.36482	-21.9102	3.03102e-84	1.58782e-82
CDO1	5.3343	1.84374	9.45179	1.40587	-4.11748	-21.9038	3.30929e-84	1.72847e-82
KIF14	7.14595	1.50485	3.75085	1.29119	3.39511	21.9024	3.37322e-84	1.75666e-82
RNASEH2A	9.19083	0.754099	7.52003	0.510828	1.6708	21.876	4.87011e-84	2.52873e-82
ANGPTL5	0.855605	1.03203	3.71217	2.22941	-2.85657	-21.8729	5.0812e-84	2.6306e-82
PRCD	2.4343	0.936149	4.51962	0.695858	-2.08532	-21.8711	5.21493e-84	2.69194e-82
MYCT1	7.19048	0.961605	9.35018	0.79552	-2.1597	-21.8629	5.83853e-84	2.99632e-82
PEAR1	6.66954	1.11523	9.11644	0.647922	-2.4469	-21.863	5.83255e-84	2.99632e-82
KIF11	9.28274	1.02602	6.96992	0.888784	2.31282	21.8524	6.75668e-84	3.45746e-82
PROS1	8.33993	1.14386	10.8172	0.470298	-2.47727	-21.8333	8.80388e-84	4.49202e-82
CASP12	0.99405	0.857416	2.94269	0.814994	-1.94864	-21.809	1.23407e-83	6.27845e-82
CORO2B	5.62592	1.24091	8.34569	0.748694	-2.71977	-21.8042	1.31777e-83	6.68502e-82
NRG2	2.52198	1.82645	6.49453	0.929352	-3.97255	-21.8018	1.36349e-83	6.89715e-82
FREM1	4.39104	1.98447	8.71768	1.08523	-4.32664	-21.7951	1.49613e-83	7.54649e-82
LOC145820	2.36528	1.22155	5.09293	0.986944	-2.72765	-21.7903	1.59857e-83	8.04019e-82
TACC3	9.45967	0.976107	7.28233	0.780687	2.17734	21.7782	1.89035e-83	9.48076e-82
LOC257358	1.1932	0.758922	2.97756	0.924024	-1.78436	-21.7722	2.0541e-83	1.02728e-81
RECQL4	8.50497	1.23481	5.72183	1.11751	2.78314	21.7601	2.42994e-83	1.21181e-81
RBMS2	9.50851	0.58316	10.8077	0.456012	-1.2992	-21.7496	2.80933e-83	1.39707e-81
TMEM63B	10.5801	0.58099	9.31392	0.314107	1.2662	21.7343	3.47316e-83	1.72234e-81
MMP27	1.00217	1.08458	3.61007	1.50377	-2.60789	-21.728	3.79134e-83	1.87486e-81
DMGDH	3.8278	1.27328	6.79948	1.5167	-2.97168	-21.7155	4.50846e-83	2.22325e-81
CDC45	7.02435	1.43444	3.71914	1.57843	3.30521	21.7118	4.74712e-83	2.33442e-81
LMNB1	9.94928	0.998585	7.69586	0.954733	2.25342	21.6477	1.15215e-82	5.65002e-81
CELF2	8.39052	1.11938	10.8724	0.89928	-2.48187	-21.6442	1.21042e-82	5.91933e-81
CLDND2	1.10177	0.937631	3.33795	1.27472	-2.23618	-21.6355	1.36425e-82	6.65318e-81
RAD51	7.16287	1.09733	4.73798	0.853264	2.42489	21.6292	1.48932e-82	7.2431e-81
AURKB	7.133	1.4535	3.85945	1.3863	3.27354	21.6224	1.63599e-82	7.93454e-81
MEOX2	5.34137	1.69064	8.99477	0.906308	-3.65339	-21.6174	1.75361e-82	8.48173e-81
C4orf49	2.54436	1.08907	5.00289	1.05944	-2.45853	-21.6153	1.80555e-82	8.70906e-81
EZH1	9.41246	0.637265	10.8111	0.451897	-1.39862	-21.5906	2.54006e-82	1.22186e-80
GYPC	8.13812	0.971917	10.3023	0.847459	-2.1642	-21.5704	3.35663e-82	1.61027e-80
CIDEC	4.31342	3.05041	11.0848	2.60879	-6.77141	-21.5641	3.66366e-82	1.7528e-80
GPBAR1	3.13492	1.01581	5.68749	1.72748	-2.55257	-21.5637	3.68535e-82	1.75841e-80
TMEM100	4.11254	1.89943	8.27457	1.38839	-4.16203	-21.5592	3.92301e-82	1.86676e-80
PCOLCE2	4.5736	2.45563	10.072	2.30095	-5.49844	-21.5467	4.6612e-82	2.21207e-80
C16orf75	8.0327	1.08993	5.61554	0.928554	2.41715	21.5356	5.43334e-82	2.57159e-80
SCN11A	2.48776	1.19842	5.11867	0.908355	-2.63091	-21.533	5.62928e-82	2.6572e-80
EDNRB	7.21851	1.25512	9.91696	0.647091	-2.69846	-21.5327	5.65354e-82	2.66154e-80
TEPP	0.599327	0.883679	2.74565	1.3343	-2.14633	-21.5134	7.38784e-82	3.46875e-80
RSPO3	5.17838	1.53441	8.49615	0.945268	-3.31777	-21.493	9.78463e-82	4.58191e-80
ADAMTS14	6.57793	1.50455	3.2241	1.38915	3.35383	21.4795	1.17916e-81	5.5071e-80
LOC284578	1.65506	1.68135	5.2643	0.899634	-3.60923	-21.4756	1.24507e-81	5.79958e-80
C2orf40	3.89443	2.4716	9.13928	0.891712	-5.24485	-21.4653	1.43405e-81	6.6623e-80
KCNAB1	5.73145	0.985843	7.9059	0.818895	-2.17446	-21.4645	1.45123e-81	6.7244e-80
CDC14B	7.46798	1.02539	9.66919	0.55018	-2.20121	-21.4603	1.53726e-81	7.10439e-80
MOCS1	8.26956	0.840147	10.1962	0.962283	-1.92664	-21.4581	1.58402e-81	7.30139e-80
MMRN2	9.11822	0.946906	11.2001	0.761734	-2.08193	-21.4542	1.6736e-81	7.69418e-80
MMP13	7.59188	2.73581	1.69901	1.62967	5.89287	21.4533	1.69349e-81	7.76541e-80
C10orf108	1.63878	1.11949	4.10903	0.947651	-2.47025	-21.4413	1.99808e-81	9.13836e-80
FAM13C	5.46667	1.3812	8.41337	0.661554	-2.9467	-21.4235	2.55446e-81	1.16528e-79
EFHA2	4.39172	1.3293	7.23602	0.692684	-2.84431	-21.4232	2.56589e-81	1.16748e-79
RAD54L	6.85721	1.28899	4.00673	1.12926	2.85047	21.4216	2.62282e-81	1.19031e-79
SPAG5	9.16896	1.16579	6.64749	0.774692	2.52147	21.4026	3.41043e-81	1.54379e-79
ALDH1A1	8.04071	1.45889	11.2012	1.00551	-3.16047	-21.3947	3.79976e-81	1.71563e-79
PPAP2A	9.26748	0.876927	11.1822	0.670367	-1.91468	-21.389	4.11038e-81	1.85114e-79
CHL1	5.92172	2.08619	10.3517	0.912863	-4.42995	-21.3863	4.26655e-81	1.91658e-79
FBXW7	8.47115	0.548655	9.65648	0.348415	-1.18533	-21.3761	4.91223e-81	2.20103e-79
KANK1	9.39645	0.969938	11.4893	0.64705	-2.0928	-21.3388	8.21925e-81	3.67349e-79
KCNE1	3.11065	1.87708	7.22039	1.55007	-4.10975	-21.3335	8.84101e-81	3.9414e-79
ESCO2	6.71874	1.21128	4.02265	1.17016	2.69609	21.3333	8.86789e-81	3.94342e-79
CACHD1	7.62364	1.29308	10.347	0.425597	-2.72339	-21.327	9.66651e-81	4.28775e-79
FGF2	6.59227	1.7913	10.4041	0.918633	-3.81182	-21.324	1.00838e-80	4.46163e-79
F10	4.2987	1.39914	7.37414	1.21496	-3.07544	-21.3132	1.17045e-80	5.16578e-79
DCT	0.71207	1.18846	3.46305	1.50669	-2.75098	-21.2987	1.42805e-80	6.28697e-79
ABCA6	5.69594	1.71802	9.36721	1.0052	-3.67126	-21.297	1.46295e-80	6.4246e-79
RUSC1	10.392	0.647835	9.01749	0.295068	1.37451	21.2958	1.48586e-80	6.50902e-79
C2orf84	1.51952	0.88145	3.70019	1.4844	-2.18067	-21.285	1.72606e-80	7.54256e-79
TSHZ2	5.77103	1.63809	9.23391	0.722743	-3.46287	-21.2827	1.78095e-80	7.7632e-79
LGI4	5.12162	1.22525	7.7842	0.949673	-2.66258	-21.2788	1.87913e-80	8.17097e-79
TMEM37	6.90386	1.10287	9.57909	1.73395	-2.67523	-21.2748	1.98574e-80	8.61333e-79
PCK1	3.00733	2.55172	8.80955	2.95407	-5.80223	-21.2656	2.25204e-80	9.7445e-79
C6orf129	8.21835	0.835779	6.4272	0.523655	1.79115	21.2615	2.38405e-80	1.02905e-78
FOXN3	9.96627	0.797187	11.7233	0.721015	-1.75702	-21.2607	2.41119e-80	1.03822e-78
SC65	9.63878	0.760273	7.95792	0.708277	1.68086	21.2558	2.57868e-80	1.10764e-78
FAM126A	7.87496	1.2036	10.4114	0.49406	-2.5364	-21.2475	2.89158e-80	1.23903e-78
SGK2	3.34222	1.54891	6.86518	1.81348	-3.52296	-21.2275	3.81004e-80	1.62863e-78
SAMD5	5.54928	1.66188	9.23612	1.64033	-3.68684	-21.2147	4.53904e-80	1.93556e-78
SKA1	6.7057	1.34256	3.81382	0.965233	2.89188	21.2116	4.73612e-80	2.01474e-78
C1QTNF9B	1.8087	1.10579	4.21721	0.914535	-2.40851	-21.2088	4.92732e-80	2.09103e-78
HSPB2	5.58332	1.30226	8.3801	0.900068	-2.79678	-21.2035	5.29619e-80	2.24218e-78
HOXA5	4.31674	1.49342	7.45268	0.58764	-3.13595	-21.1975	5.75464e-80	2.42697e-78
RERGL	2.83948	2.23001	7.51873	0.858759	-4.67926	-21.1974	5.76018e-80	2.42697e-78
SEMA3G	8.35126	1.36556	11.3136	1.11605	-2.96229	-21.1511	1.08974e-79	4.58054e-78
NDRG2	10.0824	1.29358	12.8134	0.667333	-2.73096	-21.1445	1.19238e-79	5.00008e-78
C9orf125	4.71136	1.09151	7.03888	0.701808	-2.32753	-21.1386	1.29367e-79	5.41196e-78
C10orf54	8.66026	0.942795	10.6721	0.613606	-2.01185	-21.133	1.39673e-79	5.82927e-78
GYG2	7.62065	1.49047	11.1385	2.16129	-3.51784	-21.1226	1.6115e-79	6.70978e-78
G0S2	6.37549	1.94022	10.7282	2.15236	-4.3527	-21.118	1.71737e-79	7.13375e-78
UTS2D	1.12681	0.762152	2.98991	1.26511	-1.8631	-21.1112	1.885e-79	7.81169e-78
C20orf194	8.61529	0.663269	10.0282	0.419978	-1.41288	-21.1029	2.11216e-79	8.73258e-78
POLR3K	9.08983	0.695348	7.61756	0.391818	1.47227	21.0989	2.23136e-79	9.20385e-78
LIMS2	8.11154	1.04574	10.3241	0.597215	-2.21253	-21.0965	2.30863e-79	9.50037e-78
CREB5	6.28631	1.21482	8.88047	0.830613	-2.59417	-21.0956	2.33687e-79	9.5942e-78
TPM3	13.3645	0.490591	12.2479	0.586771	1.11656	21.0938	2.39422e-79	9.80685e-78
MYH11	9.30999	2.00889	13.5267	0.956059	-4.21671	-21.0885	2.57607e-79	1.05273e-77
NCAPH	7.82645	1.20061	5.21546	1.04197	2.61099	21.0838	2.74548e-79	1.11937e-77
C21orf34	4.03354	1.46459	7.08792	0.541215	-3.05438	-21.0791	2.93047e-79	1.19204e-77
AADAC	0.981884	1.38893	4.63136	2.89492	-3.64948	-21.0624	3.68382e-79	1.49504e-77
GRIA4	2.44375	2.15475	7.21158	2.22296	-4.76783	-21.0439	4.75231e-79	1.92425e-77
SAMD14	4.32788	1.04325	2.05494	0.937992	2.27294	21.043	4.80865e-79	1.94261e-77
MAB21L1	4.02689	1.52826	7.23633	0.783677	-3.20944	-21.0417	4.89561e-79	1.97322e-77
HBB	6.21537	1.96453	10.6612	2.35675	-4.44581	-21.038	5.15254e-79	2.07205e-77
PRC1	9.83934	1.0912	7.53297	0.652064	2.30637	21.0324	5.56428e-79	2.23254e-77
TACR1	4.26992	2.00737	8.46396	0.894528	-4.19404	-21.0316	5.62343e-79	2.25116e-77
PPEF1	5.42392	1.39831	2.18159	1.90883	3.24233	21.0285	5.86611e-79	2.34299e-77
GPR17	1.88921	1.24971	4.58829	1.03999	-2.69908	-21.0223	6.39122e-79	2.54697e-77
HLF	6.30352	1.8819	10.2149	0.682849	-3.91134	-21.0189	6.69239e-79	2.66098e-77
ERCC6L	6.74321	1.1414	4.28889	0.906001	2.45433	21.0127	7.28896e-79	2.89167e-77
EZH2	8.49622	0.951656	6.4219	0.874922	2.07432	20.9992	8.77096e-79	3.47181e-77
TPRN	9.49333	0.963271	7.41065	0.818347	2.08268	20.996	9.1673e-79	3.62057e-77
KCTD4	0.431155	0.784467	2.23744	1.0398	-1.80628	-20.9879	1.0245e-78	4.03716e-77
DEPDC1B	6.41525	1.32114	3.56066	1.12652	2.85459	20.9858	1.05491e-78	4.14776e-77
DLGAP2	1.59017	1.14906	4.01334	0.690501	-2.42318	-20.9809	1.12749e-78	4.42327e-77
FAM64A	6.46295	1.33466	3.53987	1.2966	2.92308	20.9796	1.14762e-78	4.49227e-77
ROBO4	8.40051	0.867903	10.3073	0.86315	-1.90683	-20.9707	1.29741e-78	5.06737e-77
NUAK2	7.61354	0.974306	5.53516	0.713001	2.07838	20.97	1.30991e-78	5.10491e-77
F8	8.31332	0.868348	10.1937	0.760098	-1.88041	-20.9637	1.42757e-78	5.55117e-77
RNF186	1.11666	1.45786	4.41292	1.78133	-3.29626	-20.9484	1.76041e-78	6.83039e-77
PCDH9	3.4393	1.74809	7.21439	1.51975	-3.77509	-20.9408	1.95406e-78	7.56513e-77
GHR	7.89426	1.46761	11.069	1.29959	-3.17478	-20.9354	2.10453e-78	8.11833e-77
ST6GALNAC3	5.02544	1.01267	7.21983	0.90745	-2.19439	-20.9354	2.10615e-78	8.11833e-77
CCDC3	7.96596	1.20204	10.6559	1.39326	-2.68997	-20.9143	2.81125e-78	1.08126e-76
FAM83D	7.88157	1.44187	4.81321	1.07522	3.06836	20.9032	3.27286e-78	1.25607e-76
MATN2	8.38876	1.75065	11.9884	0.424959	-3.59965	-20.9002	3.4118e-78	1.30655e-76
ESPL1	7.97058	1.28788	5.15211	1.28738	2.81847	20.8901	3.91526e-78	1.49611e-76
CRYAB	8.5116	2.02955	12.7565	1.15249	-4.24491	-20.8752	4.80495e-78	1.83211e-76
CLEC1A	5.12911	0.977106	7.19887	0.692111	-2.06977	-20.8702	5.14281e-78	1.95671e-76
CDK5	8.50836	0.654059	7.12678	0.434213	1.38158	20.8688	5.24171e-78	1.99005e-76
PLEKHM3	7.7476	0.900081	9.63593	0.539546	-1.88833	-20.8649	5.53098e-78	2.09536e-76
NR3C1	9.85528	0.953491	11.8528	0.574863	-1.9975	-20.8319	8.6916e-78	3.28569e-76
TRIM11	9.63105	0.641211	8.24447	0.583021	1.38658	20.8304	8.87065e-78	3.34621e-76
ITSN1	9.50518	0.624288	11.0544	1.13687	-1.54919	-20.8279	9.18014e-78	3.45557e-76
C10orf128	3.12227	1.33198	5.91462	0.828323	-2.79235	-20.8252	9.51901e-78	3.5755e-76
NR3C2	6.58501	1.37618	9.41687	0.480165	-2.83186	-20.8192	1.03434e-77	3.87693e-76
CNTNAP3	3.94016	1.99205	8.03536	0.674189	-4.0952	-20.8158	1.0834e-77	4.0522e-76
S100B	5.12865	2.35797	10.0222	1.19014	-4.89353	-20.811	1.15635e-77	4.3068e-76
SGOL1	5.94414	1.40025	2.95453	1.14862	2.98961	20.8111	1.15442e-77	4.3068e-76
LGALS12	3.53801	2.31802	8.64263	2.50663	-5.10462	-20.8089	1.19079e-77	4.42571e-76
FAM162B	3.14948	1.17788	5.62348	0.772949	-2.47399	-20.7997	1.35069e-77	5.00948e-76
ANKDD1A	5.65895	0.765941	7.35841	0.867817	-1.69946	-20.7914	1.5121e-77	5.59636e-76
CCDC46	6.20174	1.10289	8.48852	0.549043	-2.28677	-20.788	1.58408e-77	5.85049e-76
GIMAP6	8.1781	0.949627	10.1896	0.711749	-2.01146	-20.7849	1.65239e-77	6.09005e-76
DENND2A	6.08408	1.13444	8.49452	0.891267	-2.41043	-20.7809	1.74577e-77	6.42079e-76
KLF9	9.75692	0.866052	11.6172	0.767122	-1.86033	-20.7701	2.02331e-77	7.42611e-76
CKMT2	3.28506	1.56114	6.64304	1.42215	-3.35798	-20.7571	2.41622e-77	8.84977e-76
JAM2	6.80093	1.17819	9.22606	0.501683	-2.42513	-20.7343	3.30343e-77	1.20743e-75
C14orf49	4.75999	1.27667	7.56631	1.39648	-2.80632	-20.7284	3.58062e-77	1.30604e-75
C3orf55	3.25253	1.54269	6.58558	1.48213	-3.33305	-20.7262	3.68687e-77	1.34202e-75
PPP1R16B	6.73882	1.2753	9.43822	0.996796	-2.6994	-20.7137	4.37615e-77	1.58964e-75
PDE3B	5.78911	1.60557	9.49733	2.31028	-3.70822	-20.7073	4.77527e-77	1.73106e-75
CNKSR2	1.98155	1.49606	5.16493	1.25246	-3.18338	-20.7045	4.96442e-77	1.79594e-75
CCNA2	8.43093	1.19608	5.89897	0.951514	2.53196	20.6841	6.557e-77	2.36723e-75
LOC339524	5.52045	1.38807	8.51842	1.35393	-2.99797	-20.6802	6.91741e-77	2.49224e-75
GABARAPL1	9.55884	0.7844	11.2099	0.575293	-1.65102	-20.6757	7.35085e-77	2.64301e-75
GCOM1	6.80231	1.59021	10.1784	1.32239	-3.37611	-20.6715	7.78947e-77	2.79503e-75
GNG2	8.04227	0.945217	10.1711	1.21316	-2.12884	-20.6679	8.18282e-77	2.93021e-75
CIDEA	2.95613	2.75306	8.87383	2.60877	-5.91771	-20.6589	9.25361e-77	3.30695e-75
CNN1	7.99677	1.60077	11.4246	1.46352	-3.42778	-20.6565	9.55938e-77	3.40932e-75
NNAT	3.67419	1.74612	7.46624	1.80187	-3.79205	-20.6509	1.03142e-76	3.6711e-75
DNAJB4	8.10173	0.803636	9.80508	0.658554	-1.70335	-20.6403	1.19216e-76	4.23469e-75
SBK1	9.42043	1.08328	6.91138	1.598	2.50905	20.6382	1.22665e-76	4.34844e-75
GPR116	9.21596	0.935179	11.2316	0.909713	-2.0156	-20.6312	1.34908e-76	4.7729e-75
CDC14C	1.8905	0.887575	3.77474	0.751625	-1.88425	-20.6178	1.62163e-76	5.72565e-75
RGL1	8.49409	0.93783	10.4408	0.578597	-1.94673	-20.6167	1.64505e-76	5.79674e-75
MLF1IP	8.85884	0.984085	6.76903	0.842526	2.08981	20.6082	1.84742e-76	6.49687e-75
SDS	7.31914	1.20294	4.59722	1.60838	2.72192	20.6056	1.91445e-76	6.71921e-75
KLF11	8.94006	0.6931	10.3898	0.48413	-1.44971	-20.6049	1.93242e-76	6.76884e-75
NUP210	11.1642	0.84314	9.20459	1.27155	1.95964	20.5905	2.3524e-76	8.22363e-75
DPP3	10.2809	0.672289	8.8678	0.509698	1.41308	20.5845	2.55413e-76	8.9112e-75
TAL1	5.35051	1.05666	7.56528	0.789445	-2.21476	-20.5769	2.82999e-76	9.85416e-75
C7orf58	6.9497	1.45988	10.0909	1.44409	-3.1412	-20.5684	3.17829e-76	1.10452e-74
KLF4	8.64904	1.27685	11.3728	1.1715	-2.72372	-20.5654	3.31215e-76	1.14878e-74
UBE2S	8.49222	1.1022	6.20362	0.720836	2.2886	20.564	3.37554e-76	1.16847e-74
RASSF9	4.01412	1.38338	6.84455	0.644987	-2.83044	-20.563	3.42195e-76	1.18221e-74
CX3CL1	9.3628	1.54027	12.5828	1.12995	-3.22004	-20.5606	3.53424e-76	1.21862e-74
C16orf88	9.40587	0.5517	8.22995	0.492204	1.17592	20.5549	3.82222e-76	1.31535e-74
SRPX	7.74993	1.42691	10.695	0.854798	-2.94505	-20.5432	4.48099e-76	1.53906e-74
PFKFB1	3.20278	1.56139	6.73386	2.11619	-3.53107	-20.542	4.55654e-76	1.56197e-74
SLC9A9	6.28406	0.919507	8.27404	0.958259	-1.98997	-20.5356	4.96824e-76	1.69826e-74
TMEM22	5.44148	0.985623	7.57746	1.03875	-2.13598	-20.5356	4.97338e-76	1.69826e-74
FABP4	7.27754	3.16315	13.8188	2.05384	-6.54121	-20.5042	7.62196e-76	2.59765e-74
BMP3	1.40879	1.61268	4.95727	1.91097	-3.54847	-20.4955	8.58091e-76	2.91883e-74
AKAP12	8.90084	1.33166	11.7399	1.26095	-2.8391	-20.4837	1.00742e-75	3.42021e-74
MMRN1	5.40356	2.0976	9.77878	1.57764	-4.37522	-20.4807	1.04966e-75	3.55675e-74
CNIH2	5.73779	1.49122	2.64859	1.01314	3.0892	20.4779	1.09145e-75	3.69126e-74
FAM83H	11.4096	0.81461	9.40649	1.52343	2.00314	20.4764	1.1131e-75	3.75731e-74
EMCN	7.83404	1.14101	10.1766	0.652149	-2.34254	-20.4735	1.1581e-75	3.90173e-74
GINS1	8.17076	1.02672	6.02398	0.795367	2.14678	20.4692	1.22829e-75	4.13033e-74
CCNF	9.07979	0.778421	7.43668	0.668687	1.64311	20.465	1.30049e-75	4.36481e-74
VWF	11.3915	0.992325	13.5391	1.06178	-2.14758	-20.4648	1.30375e-75	4.36745e-74
TTC28	8.73142	0.799726	10.3577	0.34321	-1.6263	-20.4621	1.35256e-75	4.52236e-74
TCEAL7	4.61619	1.2425	7.15338	0.6391	-2.53719	-20.4529	1.53226e-75	5.11353e-74
FAM122A	8.72748	0.498413	9.76147	0.3331	-1.03399	-20.4521	1.55014e-75	5.16341e-74
IL33	6.19839	2.21218	10.6524	0.624026	-4.45401	-20.4382	1.87268e-75	6.22605e-74
AVPR2	3.2068	1.58215	6.45653	0.971208	-3.24974	-20.4214	2.35418e-75	7.81215e-74
CMA1	1.66783	1.68923	5.29441	1.73995	-3.62658	-20.4195	2.41475e-75	7.99814e-74
CLIC5	6.22045	1.31836	8.94682	0.923014	-2.72637	-20.4006	3.12392e-75	1.03277e-73
LLGL2	10.6045	0.853028	8.63031	1.31343	1.97421	20.3982	3.22841e-75	1.06532e-73
SAA4	1.94571	1.71312	5.49669	1.25848	-3.55098	-20.3858	3.82039e-75	1.25831e-73
GIMAP7	7.05553	1.04948	9.23039	0.767139	-2.17486	-20.3764	4.34217e-75	1.4275e-73
WDR34	10.7057	0.728077	9.14687	0.739709	1.55886	20.3705	4.70088e-75	1.54255e-73
TUSC5	4.22978	3.27303	11.0426	2.57958	-6.81283	-20.3665	4.96473e-75	1.62611e-73
CXCL3	1.65732	1.43979	4.63866	1.07237	-2.98134	-20.3415	6.96983e-75	2.27862e-73
EHBP1	9.46803	0.595463	10.7752	0.718243	-1.30715	-20.3407	7.04883e-75	2.30019e-73
LOC646982	0.749123	0.623317	2.15551	0.870434	-1.40638	-20.3268	8.51228e-75	2.77262e-73
GPLD1	3.21139	1.49098	6.381	1.48695	-3.16962	-20.3014	1.20113e-74	3.90512e-73
RBMS3	4.80657	1.36258	7.58044	0.793118	-2.77387	-20.2892	1.41798e-74	4.60166e-73
FAM70A	5.05392	1.42751	7.95384	0.809232	-2.89991	-20.2716	1.80143e-74	5.83532e-73
DEPDC1	7.45016	1.40405	4.53198	1.14877	2.91818	20.2635	2.00929e-74	6.4967e-73
PER1	9.05222	1.11708	11.3727	0.908592	-2.32044	-20.2565	2.20993e-74	7.13237e-73
SLC6A2	1.20612	1.69092	4.61659	0.819946	-3.41047	-20.2494	2.4337e-74	7.84024e-73
ATP6V0B	11.4293	0.644681	10.1081	0.433606	1.32126	20.2307	3.13545e-74	1.00826e-72
GALNTL2	7.00021	1.62951	10.3883	1.37163	-3.38805	-20.2223	3.51345e-74	1.12775e-72
SYN2	3.81849	2.05128	7.94247	0.942464	-4.12398	-20.2203	3.61299e-74	1.1576e-72
KCTD12	10.5036	0.978764	12.4962	0.60977	-1.99258	-20.2114	4.07241e-74	1.30243e-72
NTRK2	8.79145	2.11641	13.0054	0.599294	-4.21394	-20.2102	4.13942e-74	1.32147e-72
CUBN	4.68869	0.968381	6.71283	0.861929	-2.02414	-20.2064	4.35878e-74	1.38899e-72
CSRNP1	9.4179	0.814357	11.2503	1.15894	-1.83244	-20.2056	4.4084e-74	1.40227e-72
CCT3	13.0893	0.542026	11.9809	0.359114	1.10838	20.1828	6.00741e-74	1.90746e-72
CAPZA3	0.647388	1.02106	2.91196	1.36958	-2.26457	-20.1791	6.31102e-74	2.00026e-72
TANK	9.55835	0.566651	10.7514	0.538412	-1.19301	-20.1698	7.16204e-74	2.26593e-72
PDZD2	8.25897	1.34968	11.0712	1.19315	-2.81221	-20.1667	7.46419e-74	2.35729e-72
HN1L	12.3417	0.612788	11.0846	0.43809	1.25709	20.1658	7.56343e-74	2.38437e-72
FHL5	4.26097	1.45052	7.24396	1.11531	-2.983	-20.1538	8.89636e-74	2.79958e-72
UGP2	11.0934	0.541079	12.32	0.800166	-1.22651	-20.1431	1.02859e-73	3.23109e-72
RABIF	8.95848	0.553563	7.84108	0.295377	1.1174	20.1346	1.15362e-73	3.61739e-72
STX11	6.1785	0.965182	8.35399	1.40921	-2.17549	-20.129	1.2436e-73	3.89265e-72
SYNPO2	9.15111	1.53906	12.2453	0.810035	-3.09418	-20.1244	1.32422e-73	4.13766e-72
EEPD1	7.50372	0.842634	9.25349	0.731216	-1.74978	-20.118	1.44338e-73	4.50201e-72
MBNL1	11.1448	0.553223	12.2998	0.505269	-1.15501	-20.0853	2.24891e-73	7.00217e-72
GSTM5	4.71656	2.03059	8.87777	1.56621	-4.16121	-20.0826	2.33133e-73	7.24601e-72
TIMP4	4.70787	2.33271	9.57426	2.18218	-4.86639	-20.078	2.47948e-73	7.67942e-72
MYLK	10.7064	1.29359	13.3402	0.91162	-2.63377	-20.076	2.55007e-73	7.88422e-72
PIK3R2	11.082	0.56004	9.90967	0.527266	1.17233	20.0734	2.64042e-73	8.14929e-72
WISP1	7.65686	1.59693	4.41515	1.08112	3.24171	20.0719	2.69325e-73	8.29784e-72
MCAM	10.8543	0.855288	12.7537	1.18558	-1.89948	-20.0605	3.14508e-73	9.67305e-72
XPNPEP2	2.95166	1.66611	6.45331	1.67356	-3.50166	-20.0543	3.41655e-73	1.04897e-71
GFAP	2.54797	1.88981	6.40064	1.39587	-3.85267	-20.0432	3.97269e-73	1.2176e-71
CLIC2	7.3776	0.892757	9.20887	0.709565	-1.83126	-20.033	4.55874e-73	1.3948e-71
SLCO1A2	1.1531	1.62424	4.81555	2.43114	-3.66245	-20.03	4.74796e-73	1.45018e-71
CLDN19	2.26279	2.11449	6.71917	2.19404	-4.45638	-20.0283	4.85885e-73	1.48149e-71
SPC24	4.1623	1.40751	1.32867	0.862278	2.83363	20.0157	5.76147e-73	1.75357e-71
TRIM59	8.0679	0.850162	6.25011	0.971419	1.81779	20.0156	5.77108e-73	1.75357e-71
MPL	3.61971	0.769264	5.17373	0.500798	-1.55401	-19.9941	7.70713e-73	2.33783e-71
C9orf7	9.92973	0.732782	8.34782	0.890748	1.58191	19.994	7.72607e-73	2.33956e-71
ARHGAP39	8.89999	0.794309	7.1477	1.08324	1.75229	19.9921	7.92718e-73	2.39634e-71
FAM150B	1.47417	1.80087	5.19793	1.61554	-3.72376	-19.9881	8.36502e-73	2.52438e-71
MMD	8.16327	0.977398	10.4853	1.77278	-2.32199	-19.9878	8.39827e-73	2.52578e-71
NPHP3	8.10316	0.713671	9.55968	0.542576	-1.45652	-19.9879	8.38844e-73	2.52578e-71
NRN1	7.42757	1.24726	9.97358	0.967368	-2.54601	-19.9875	8.4276e-73	2.53029e-71
AGAP11	4.89881	1.32301	7.5764	0.915126	-2.67759	-19.981	9.20803e-73	2.75991e-71
AKR1C1	6.21418	2.22505	10.7593	1.76103	-4.54507	-19.9776	9.63302e-73	2.8824e-71
MBOAT7	11.0293	0.722593	9.54158	0.614161	1.48774	19.9763	9.80996e-73	2.93037e-71
PPP4C	11.1414	0.645568	9.84394	0.382697	1.29746	19.9745	1.00457e-72	2.99571e-71
PID1	6.07318	1.40409	8.93106	1.06245	-2.85788	-19.9708	1.05574e-72	3.143e-71
ERG	7.90804	0.969285	9.85861	0.615483	-1.95057	-19.958	1.25578e-72	3.73225e-71
VIP	1.08065	0.855401	2.91256	1.00773	-1.83191	-19.9494	1.41064e-72	4.18544e-71
P2RY12	3.4861	1.6457	6.7975	1.06937	-3.31139	-19.9445	1.50562e-72	4.45977e-71
GIMAP5	7.46868	1.01251	9.5012	0.634185	-2.03253	-19.9253	1.95152e-72	5.77089e-71
SHCBP1	7.3937	1.19099	4.94216	1.05188	2.45154	19.9214	2.0559e-72	6.06938e-71
SH3BGRL2	8.16743	1.19159	10.5136	0.432587	-2.34619	-19.9029	2.64175e-72	7.78588e-71
ANK2	7.29569	1.37177	10.1047	1.16458	-2.80905	-19.8978	2.82722e-72	8.31862e-71
TDRD10	2.8813	1.36059	5.57713	0.657355	-2.69583	-19.8907	3.11368e-72	9.14624e-71
APOA1BP	11.2893	0.659207	9.97763	0.342359	1.31166	19.8878	3.23731e-72	9.4936e-71
FERMT2	9.71489	0.901558	11.6089	0.959528	-1.89405	-19.8768	3.75259e-72	1.09864e-70
CSF3	0.733698	1.1882	3.69002	2.49801	-2.95632	-19.8757	3.80753e-72	1.11288e-70
C17orf103	8.23455	0.819195	9.91962	0.730556	-1.68508	-19.8729	3.95769e-72	1.15486e-70
TUBA1C	11.8433	0.710001	10.4017	0.546769	1.44162	19.8656	4.36711e-72	1.27223e-70
ARF1	13.7654	0.508624	12.7593	0.214073	1.00614	19.8653	4.38404e-72	1.27506e-70
CCL14	6.61428	2.1736	10.9029	1.00114	-4.28863	-19.8434	5.88791e-72	1.70962e-70
APCDD1	8.22967	1.26583	10.7445	0.709569	-2.51484	-19.832	6.86216e-72	1.98924e-70
SYT15	5.31526	1.25529	7.82955	0.828133	-2.51429	-19.8306	6.99864e-72	2.02548e-70
CENPA	6.45979	1.39171	3.64069	1.08449	2.8191	19.8296	7.09321e-72	2.04949e-70
HOXA6	2.06813	1.44595	4.94414	0.841906	-2.87601	-19.8244	7.60407e-72	2.1935e-70
ACO1	9.73313	0.675893	11.3342	1.24475	-1.6011	-19.8158	8.53874e-72	2.4591e-70
RHOQ	10.2471	0.642879	11.682	0.959415	-1.43488	-19.8069	9.61947e-72	2.76583e-70
TLN2	9.35092	0.860595	11.1596	0.941457	-1.80873	-19.8049	9.88706e-72	2.83815e-70
RCBTB2	7.79109	0.736796	9.2382	0.299174	-1.44711	-19.7833	1.32225e-71	3.78946e-70
TFPI	7.89174	1.2562	10.3921	0.773897	-2.50034	-19.7805	1.37366e-71	3.93041e-70
BMP2	4.48331	1.4371	7.3943	1.15469	-2.91099	-19.78	1.38285e-71	3.95029e-70
CCNE2	7.65646	1.24588	5.17272	0.81199	2.48373	19.7512	2.03527e-71	5.80464e-70
SCN9A	3.50866	1.29326	6.17355	1.25109	-2.66489	-19.748	2.12728e-71	6.05726e-70
ZNF781	4.12233	0.910999	5.93004	0.542737	-1.80772	-19.7413	2.32714e-71	6.60503e-70
CLCN6	8.21549	0.586806	9.38067	0.341881	-1.16519	-19.74	2.36652e-71	6.70602e-70
IBSP	4.61362	2.21772	0.310073	0.534635	4.30355	19.7284	2.76767e-71	7.83019e-70
ATP6AP1	12.5662	0.596262	11.3853	0.334011	1.1809	19.7252	2.88976e-71	8.16252e-70
GTF2IRD1	9.4791	0.528736	8.39261	0.493122	1.08649	19.7182	3.17534e-71	8.95486e-70
TSTA3	10.9221	0.847453	9.2373	0.542061	1.68483	19.7027	3.90689e-71	1.10004e-69
PRRT4	2.76836	1.64593	6.29307	2.09348	-3.52471	-19.6983	4.14721e-71	1.16584e-69
RGS6	2.94782	1.82411	6.51687	0.808534	-3.56905	-19.6974	4.19971e-71	1.17872e-69
CLDN11	6.31029	1.70864	9.66274	0.831105	-3.35245	-19.6966	4.24045e-71	1.18827e-69
BGN	13.6314	1.13964	11.3197	0.972819	2.31169	19.6954	4.31433e-71	1.20706e-69
RHPN1	9.29346	1.14471	6.8629	1.38955	2.43056	19.6898	4.64954e-71	1.29878e-69
PCNX	9.97688	0.66319	11.3015	0.46066	-1.32463	-19.6795	5.34085e-71	1.48953e-69
CRB3	8.23001	0.840254	6.04757	2.00519	2.18244	19.6709	5.99452e-71	1.6692e-69
ODF3L1	2.04723	1.15074	4.42609	1.17915	-2.37886	-19.6678	6.24936e-71	1.73742e-69
HTR2A	1.71319	1.40895	4.63319	1.47778	-2.92	-19.6612	6.8291e-71	1.89561e-69
ADAMTS1	9.2534	1.4287	12.0819	0.905072	-2.82854	-19.6492	8.02071e-71	2.22288e-69
FOSB	8.43038	2.18892	12.8366	1.77415	-4.40621	-19.6475	8.20708e-71	2.27097e-69
ARHGEF15	7.74131	0.962057	9.6985	0.870853	-1.95719	-19.6321	1.00907e-70	2.78782e-69
ZFP106	10.5994	0.68258	12.045	0.828871	-1.44559	-19.6132	1.29927e-70	3.58395e-69
FGFBP2	2.54426	1.94671	6.54875	1.9741	-4.0045	-19.6066	1.4212e-70	3.91418e-69
SCN5A	2.34873	1.41851	5.20235	1.17647	-2.85362	-19.5899	1.77642e-70	4.88487e-69
PGM5	6.25038	1.71961	9.58882	0.722428	-3.33844	-19.5707	2.29838e-70	6.31037e-69
RHOXF1	0.929736	0.946833	2.99627	1.35851	-2.06653	-19.5692	2.34647e-70	6.43238e-69
AKAP6	5.4843	1.20655	7.89737	0.952889	-2.41307	-19.5537	2.88696e-70	7.90177e-69
INMT	5.50438	1.63081	8.70531	0.969999	-3.20093	-19.5455	3.22258e-70	8.80674e-69
PENK	2.11913	1.83567	5.93478	2.05728	-3.81565	-19.5361	3.65551e-70	9.9744e-69
BMP6	5.55752	1.26942	8.09185	0.99414	-2.53432	-19.5338	3.76869e-70	1.02674e-68
C1QTNF6	9.64869	1.07722	7.53409	0.646541	2.1146	19.5292	4.00582e-70	1.08966e-68
DOCK11	7.81873	1.16961	10.2837	1.4265	-2.46496	-19.5278	4.08307e-70	1.10896e-68
PLD5	1.06628	1.3723	3.81004	1.10333	-2.74376	-19.5221	4.40803e-70	1.19538e-68
PAK4	10.8702	0.626155	9.50207	0.909196	1.36816	19.5138	4.92477e-70	1.33346e-68
PAK7	1.92067	1.7822	5.68169	2.20583	-3.76102	-19.5103	5.16359e-70	1.39599e-68
H2AFZ	11.8208	0.663562	10.529	0.320835	1.29175	19.5061	5.45846e-70	1.47345e-68
HOXA2	2.67921	1.43094	5.45813	0.689258	-2.77892	-19.4986	6.0393e-70	1.62775e-68
ANKRD29	5.01163	1.62986	8.14207	0.462908	-3.13044	-19.4918	6.61213e-70	1.77943e-68
PHYHIP	4.15992	1.44803	6.98899	0.828778	-2.82907	-19.4882	6.94421e-70	1.86595e-68
EPB41L2	9.92535	0.986786	11.8833	0.732258	-1.958	-19.4865	7.09832e-70	1.90446e-68
IL11RA	7.07039	0.943788	8.89535	0.392604	-1.82496	-19.481	7.64437e-70	2.04786e-68
PLAGL1	7.16229	1.28787	9.64716	0.507879	-2.48488	-19.4733	8.47085e-70	2.26582e-68
CD209	5.16464	1.48649	8.25158	1.69139	-3.08694	-19.4693	8.93419e-70	2.38614e-68
KIF22	10.5644	0.68451	9.20125	0.531475	1.36316	19.4685	9.03476e-70	2.40936e-68
EPHB1	4.99924	1.62466	8.26286	1.42118	-3.26362	-19.4663	9.29944e-70	2.4762e-68
SOX17	5.63251	1.11389	7.89297	1.07151	-2.26046	-19.4574	1.0474e-69	2.78475e-68
MYBL2	9.10127	1.74943	5.6136	1.43076	3.48767	19.441	1.30504e-69	3.46453e-68
RHOJ	6.95738	1.0239	8.92939	0.406252	-1.972	-19.4282	1.54864e-69	4.10507e-68
SAA2	5.42232	2.71522	10.7931	2.04386	-5.37078	-19.4229	1.66236e-69	4.39991e-68
TRPM6	2.48363	1.66949	5.71471	0.828733	-3.23107	-19.4152	1.84291e-69	4.87048e-68
GABRE	4.89432	2.00246	8.8419	1.44934	-3.94758	-19.4103	1.96857e-69	5.19479e-68
GPR182	0.93113	0.8223	2.7169	1.19652	-1.78577	-19.4028	2.17436e-69	5.72927e-68
SOX7	6.63042	1.08913	8.78645	0.833741	-2.15603	-19.3995	2.27307e-69	5.98044e-68
PLXNA4	6.67931	1.62467	10.0185	1.77174	-3.33922	-19.3943	2.43605e-69	6.39971e-68
RNASE7	1.79282	1.5503	4.96952	1.67341	-3.1767	-19.3633	3.68455e-69	9.66524e-68
MAML2	7.48671	1.44246	10.2677	0.702212	-2.78099	-19.3508	4.35697e-69	1.14122e-67
SPRY1	8.98736	1.15424	11.2143	0.573545	-2.22694	-19.3462	4.63436e-69	1.21208e-67
CILP2	7.83885	1.60779	4.7229	0.911139	3.11595	19.3417	4.9151e-69	1.2836e-67
KIT	8.18811	1.96281	12.0895	1.6466	-3.90141	-19.3405	4.99822e-69	1.30338e-67
KCNMB1	6.24096	1.41148	9.1158	1.47547	-2.87484	-19.3312	5.6589e-69	1.47348e-67
ADH1B	6.37365	3.84903	13.8124	2.10153	-7.43878	-19.3249	6.1551e-69	1.60033e-67
WASF3	7.04656	1.38573	9.72785	0.777152	-2.68129	-19.3168	6.85461e-69	1.77958e-67
TLCD1	7.60457	1.14509	5.36762	0.77021	2.23695	19.3162	6.91071e-69	1.79151e-67
DEFB132	2.52347	1.87082	6.51472	2.57742	-3.99125	-19.314	7.11371e-69	1.84143e-67
SSTR1	2.67566	1.58214	5.71359	0.725563	-3.03793	-19.3098	7.53141e-69	1.9467e-67
FAM111B	8.42785	1.32328	5.71643	1.4563	2.71142	19.3054	7.98134e-69	2.05998e-67
SCN2B	3.30141	1.95064	7.04854	0.930903	-3.74712	-19.2976	8.85833e-69	2.28299e-67
CYP2U1	7.41869	0.872822	9.10601	0.482208	-1.68732	-19.2955	9.1125e-69	2.34507e-67
TCF21	0.766693	0.825789	2.51028	1.08139	-1.74358	-19.2946	9.2192e-69	2.36908e-67
FAM54A	5.65393	1.24105	3.24273	0.783295	2.4112	19.2833	1.0723e-68	2.7515e-67
CES1	6.59796	2.18975	10.9248	1.77914	-4.32686	-19.2823	1.08688e-68	2.78488e-67
FAM89A	5.98044	1.29093	8.63634	1.47111	-2.6559	-19.2812	1.10257e-68	2.82098e-67
ADAM33	5.34472	1.95033	9.06498	0.735088	-3.72026	-19.277	1.16502e-68	2.97215e-67
PI16	4.6201	2.96196	10.3835	1.95099	-5.76345	-19.2771	1.16422e-68	2.97215e-67
FGF1	7.66569	1.27482	10.1297	0.733957	-2.46397	-19.2714	1.25679e-68	3.20163e-67
TIMM17A	10.5568	0.530163	9.52783	0.315007	1.02897	19.2639	1.38882e-68	3.5329e-67
RAB26	7.01422	1.56644	3.90137	1.3718	3.11285	19.2543	1.5769e-68	4.00555e-67
ECSCR	5.90964	1.03125	7.93055	0.765592	-2.02091	-19.2465	1.75103e-68	4.44147e-67
E2F1	8.35199	1.23528	5.94397	0.85397	2.40801	19.2445	1.79794e-68	4.55391e-67
ARID5B	10.269	0.969685	12.1327	0.498304	-1.86372	-19.2431	1.83194e-68	4.63338e-67
LOC134466	3.83356	1.34715	6.42857	0.748679	-2.59501	-19.2375	1.97399e-68	4.98552e-67
THSD1	6.55898	0.890764	8.26563	0.419876	-1.70665	-19.234	2.06815e-68	5.21587e-67
ABCB1	5.40504	1.60139	8.49101	0.905748	-3.08597	-19.2338	2.07354e-68	5.222e-67
BMPER	3.30002	1.75234	6.71808	1.24829	-3.41807	-19.225	2.3305e-68	5.86078e-67
EIF4EBP2	11.8638	0.471902	12.875	0.666812	-1.01117	-19.2226	2.40783e-68	6.04664e-67
EGFLAM	7.48042	1.00423	9.42643	0.638539	-1.94601	-19.2186	2.53907e-68	6.36716e-67
KIF15	7.28598	1.31475	4.70549	1.02664	2.58049	19.2093	2.87412e-68	7.19712e-67
GJB2	8.93096	2.03587	5.02223	1.09435	3.90873	19.2064	2.9875e-68	7.47043e-67
LTBP4	9.5171	1.01145	11.5054	0.804002	-1.98829	-19.2035	3.1024e-68	7.74678e-67
USHBP1	4.84701	1.19546	7.15988	0.757758	-2.31287	-19.1969	3.38641e-68	8.44402e-67
RPLP0P2	5.87641	1.11432	3.72778	0.661391	2.14862	19.1944	3.50331e-68	8.72319e-67
TMEM88	4.43182	1.14673	6.65787	0.773334	-2.22605	-19.1916	3.63748e-68	9.04452e-67
LSM4	10.8143	0.688404	9.48539	0.40946	1.32892	19.1885	3.78751e-68	9.40432e-67
C10orf10	9.87738	1.28426	12.4268	1.15454	-2.54943	-19.1796	4.2669e-68	1.05798e-66
MAP7D3	6.51929	1.22464	8.91563	0.939659	-2.39634	-19.1757	4.49024e-68	1.11179e-66
STK32A	1.11379	1.17932	3.46491	1.10803	-2.35112	-19.1682	4.96732e-68	1.22819e-66
HNRNPAB	11.7523	0.521503	10.7337	0.377646	1.01855	19.1624	5.361e-68	1.32368e-66
ZBTB16	4.06731	2.35048	8.56712	1.2912	-4.49981	-19.1357	7.6524e-68	1.88681e-66
ACSL1	10.5714	1.20425	13.0982	1.60111	-2.52672	-19.1288	8.38427e-68	2.06438e-66
GOLGA9P	0.573907	0.598181	1.9101	1.01968	-1.33619	-19.1283	8.44249e-68	2.07582e-66
MEOX1	5.04216	2.11159	9.05579	0.958668	-4.01363	-19.124	8.93657e-68	2.19424e-66
MYOCD	2.59514	1.46095	5.45628	1.17951	-2.86114	-19.1164	9.88463e-68	2.42366e-66
PGA3	0.810144	1.23343	3.51575	1.99286	-2.70561	-19.1021	1.19585e-67	2.92809e-66
HYMAI	0.825541	0.872874	2.55817	0.817734	-1.73263	-19.08	1.60276e-67	3.919e-66
GRRP1	4.49945	1.26911	6.962	0.933416	-2.46255	-19.0762	1.68621e-67	4.11735e-66
PTRF	12.0906	1.00703	14.0389	0.716276	-1.94832	-19.0577	2.15578e-67	5.24939e-66
TTK	7.59539	1.32663	4.96862	1.23781	2.62677	19.055	2.2349e-67	5.43455e-66
HN1	10.7951	0.986179	8.90242	0.617083	1.89266	19.0495	2.40407e-67	5.83789e-66
TMEM8A	10.3959	0.658951	9.11843	0.490491	1.27742	19.0092	4.1009e-67	9.94467e-66
PLAC9	5.46313	1.72876	8.83329	1.42311	-3.37016	-18.9995	4.66165e-67	1.1289e-65
C16orf53	10.519	0.655772	9.25774	0.441635	1.2613	18.9861	5.56964e-67	1.34694e-65
SPINT2	13.4305	0.731047	11.5619	1.81929	1.8686	18.9843	5.70277e-67	1.37725e-65
MLXIPL	4.46463	1.88642	8.21232	1.88304	-3.74769	-18.9731	6.6179e-67	1.59607e-65
SAA1	7.23293	2.72378	12.4346	1.70569	-5.20163	-18.9723	6.68769e-67	1.6107e-65
ADRBK2	9.03486	0.831196	10.7438	1.03459	-1.70895	-18.9694	6.94826e-67	1.67118e-65
VWCE	2.96358	1.18629	5.25343	0.881441	-2.28985	-18.961	7.77393e-67	1.86722e-65
P2RY14	4.49855	1.00671	6.56118	1.23525	-2.06263	-18.96	7.87178e-67	1.88816e-65
HBA2	6.1806	1.87154	10.0245	2.3365	-3.84391	-18.9593	7.947e-67	1.90103e-65
ANTXR2	9.18187	0.932591	11.037	0.939933	-1.85513	-18.9586	8.02096e-67	1.91613e-65
H2AFX	9.42236	0.893963	7.70589	0.614785	1.71648	18.9499	8.99656e-67	2.14629e-65
KIAA1239	1.24936	1.43668	4.33212	2.20461	-3.08276	-18.9422	9.96846e-67	2.37494e-65
KIF26B	8.02254	1.49868	5.08573	1.34425	2.93681	18.9403	1.02195e-66	2.43147e-65
KLF6	11.5006	0.799676	13.0788	0.758695	-1.57821	-18.9387	1.04368e-66	2.47983e-65
BHMT2	5.15446	1.53272	8.25796	1.77335	-3.1035	-18.9338	1.11332e-66	2.64174e-65
SLC25A22	9.25036	0.731266	7.80191	0.716094	1.44845	18.9318	1.14356e-66	2.70986e-65
SNTG2	1.19418	1.37173	3.90598	1.33861	-2.7118	-18.9276	1.20862e-66	2.86019e-65
C19orf69	0.430452	0.534031	1.61401	0.922138	-1.18356	-18.8961	1.83419e-66	4.33478e-65
F12	6.87917	1.44964	3.99807	1.49766	2.8811	18.8934	1.90089e-66	4.48642e-65
AP1S1	9.97493	0.611104	8.78771	0.502332	1.18722	18.892	1.93691e-66	4.56532e-65
SAV1	9.65498	0.619204	10.8268	0.336303	-1.17184	-18.8769	2.36429e-66	5.56523e-65
EGR1	11.3384	1.64068	14.4978	1.26045	-3.15946	-18.8751	2.42161e-66	5.69255e-65
ZNF668	8.32035	0.648031	7.06558	0.520098	1.25477	18.8734	2.47592e-66	5.81249e-65
PROX1	2.56153	1.63742	5.71752	1.27733	-3.15599	-18.8691	2.62131e-66	6.14564e-65
LPHN3	3.95469	1.8382	7.41187	0.914968	-3.45717	-18.8666	2.70835e-66	6.34128e-65
P4HA3	7.25108	1.43755	4.422	1.38832	2.82908	18.8664	2.71784e-66	6.35508e-65
SNRNP25	9.574	0.706585	8.21503	0.526244	1.35897	18.8644	2.78926e-66	6.51345e-65
STAT5B	10.5021	0.722347	11.8619	0.35423	-1.35987	-18.862	2.88042e-66	6.71744e-65
LOC158376	3.83712	1.25924	6.27629	1.04423	-2.43917	-18.8603	2.94613e-66	6.8616e-65
ANO6	10.9278	0.704191	12.3476	0.806441	-1.41975	-18.8554	3.14091e-66	7.30563e-65
MARCKSL1	12.7599	0.734768	11.1784	1.15696	1.5815	18.8543	3.18774e-66	7.40479e-65
BAI3	1.72318	1.29028	4.1574	0.705881	-2.43423	-18.8523	3.27484e-66	7.59712e-65
PDGFD	8.53558	1.17241	10.7309	0.524806	-2.19535	-18.8371	4.00299e-66	9.27413e-65
ELTD1	8.85763	0.941553	10.701	0.876269	-1.84334	-18.8357	4.07731e-66	9.43393e-65
FLI1	8.0756	0.82118	9.66586	0.685906	-1.59026	-18.8275	4.54534e-66	1.05031e-64
CDT1	7.83213	1.27337	5.2793	1.43227	2.55284	18.8261	4.62744e-66	1.06788e-64
DCUN1D3	7.46341	0.507318	8.54337	0.765696	-1.07996	-18.8167	5.2386e-66	1.20734e-64
NECAB1	4.74772	1.47174	7.51041	0.747662	-2.76269	-18.814	5.42983e-66	1.24978e-64
ART4	1.22448	1.44166	4.00297	1.16443	-2.77849	-18.8116	5.60293e-66	1.28794e-64
CLDN5	6.90527	1.53825	9.82405	0.997835	-2.91878	-18.8086	5.83208e-66	1.33888e-64
PECAM1	9.74301	0.824318	11.39	0.908973	-1.64701	-18.8038	6.21611e-66	1.42518e-64
DPYSL2	10.463	0.916343	12.1749	0.411081	-1.71188	-18.783	8.18128e-66	1.87331e-64
LOC100124692	1.58476	1.85946	5.38464	2.37773	-3.79988	-18.78	8.5104e-66	1.94615e-64
INHBA	8.05758	1.59134	5.04464	1.02117	3.01294	18.7796	8.54862e-66	1.95236e-64
RGS7BP	2.14931	1.47603	4.96093	1.06768	-2.81161	-18.752	1.23035e-65	2.80627e-64
CBX7	9.14576	0.975829	10.966	0.444275	-1.82022	-18.7492	1.27763e-65	2.91036e-64
CYP7A1	0.66041	0.638156	1.91135	0.619536	-1.25094	-18.7446	1.35753e-65	3.08736e-64
FAM49A	5.68067	1.16746	7.85644	0.526275	-2.17577	-18.7445	1.35883e-65	3.08736e-64
LSR	11.2955	0.785029	9.68803	1.01862	1.6075	18.7433	1.38023e-65	3.13195e-64
DTX1	6.00724	1.32887	8.58727	1.20565	-2.58003	-18.741	1.42287e-65	3.22457e-64
FGFBP1	1.65242	2.24214	5.96533	1.85607	-4.31291	-18.7404	1.43366e-65	3.24484e-64
NLGN1	2.29004	1.81231	5.68415	0.970524	-3.39411	-18.7365	1.50991e-65	3.41305e-64
KLHL13	6.28117	1.83357	9.75811	1.26291	-3.47694	-18.7315	1.61231e-65	3.6352e-64
IQSEC3	3.41784	1.46682	6.22259	1.14383	-2.80475	-18.7183	1.91882e-65	4.30978e-64
ELMOD3	8.51783	0.557779	9.74686	0.976629	-1.22903	-18.7125	2.07208e-65	4.64808e-64
PTPRB	8.80056	1.1229	10.9511	0.89394	-2.15059	-18.7107	2.12188e-65	4.75376e-64
TGFBR3	9.04473	1.85776	12.4735	0.613141	-3.42879	-18.6949	2.61266e-65	5.84587e-64
PDE7B	5.63849	1.08536	7.67606	0.642018	-2.03756	-18.69	2.78677e-65	6.22755e-64
CIT	8.49616	0.992141	6.59753	0.793277	1.89863	18.6846	2.99052e-65	6.67442e-64
PLA2G4A	5.56808	1.55056	8.4411	0.650389	-2.87301	-18.6777	3.27904e-65	7.30912e-64
GPR133	4.7836	1.66664	7.99003	1.43525	-3.20643	-18.6722	3.5226e-65	7.83225e-64
AOC2	3.57963	1.16915	5.9231	1.38348	-2.34347	-18.6688	3.68412e-65	8.18106e-64
HDGF	12.9821	0.564367	11.9227	0.325351	1.05943	18.6664	3.80128e-65	8.43063e-64
DSC1	2.03929	1.54856	5.20727	2.05538	-3.16798	-18.6619	4.03505e-65	8.93785e-64
SYNE1	9.45754	1.03041	11.3836	0.580376	-1.92607	-18.6492	4.77033e-65	1.05533e-63
PARP1	12.4379	0.567121	11.3803	0.283703	1.0576	18.6483	4.82351e-65	1.06576e-63
ADIPOQ	6.13826	3.83451	13.3998	2.77834	-7.26156	-18.648	4.84741e-65	1.0697e-63
LOC401093	5.77992	1.05195	7.78448	0.820676	-2.00456	-18.645	5.0378e-65	1.11033e-63
GPC3	7.21553	2.02728	10.9876	1.04577	-3.77203	-18.6424	5.2135e-65	1.14762e-63
GPR172A	10.4151	0.863392	8.78966	0.561433	1.62548	18.6415	5.27405e-65	1.1595e-63
CRTAP	11.7232	0.492697	12.7325	0.652621	-1.00926	-18.6333	5.87877e-65	1.28924e-63
CABP1	2.18171	1.08069	4.30201	1.12294	-2.1203	-18.6302	6.12314e-65	1.34116e-63
SLC16A12	2.60547	1.68165	5.77558	1.15749	-3.17011	-18.6212	6.8944e-65	1.50823e-63
MAOA	7.83392	2.03493	11.6733	1.4316	-3.83941	-18.6131	7.67212e-65	1.67421e-63
TMED3	11.7183	0.697169	10.3043	0.891171	1.41397	18.6105	7.93085e-65	1.72853e-63
LASS2	13.1604	0.702627	11.8579	0.323543	1.30254	18.6082	8.18131e-65	1.78092e-63
EME1	6.17392	1.2026	3.92091	0.753737	2.25301	18.6005	9.05127e-65	1.96787e-63
SCN3B	3.69791	1.68077	6.79938	0.7157	-3.10148	-18.5952	9.70574e-65	2.10498e-63
PPP1R1A	5.7641	2.61198	10.6693	1.74485	-4.90524	-18.5888	1.05483e-64	2.2849e-63
ABLIM1	10.9448	0.947844	12.7013	0.464613	-1.75648	-18.5831	1.13681e-64	2.45947e-63
CASQ2	4.05329	1.78476	7.45569	1.46796	-3.4024	-18.5813	1.16426e-64	2.51578e-63
DIXDC1	9.19321	0.885063	10.8363	0.460907	-1.64305	-18.5733	1.29316e-64	2.79088e-63
MRPS34	10.3786	0.752848	8.93979	0.634561	1.43878	18.5596	1.54991e-64	3.34092e-63
N4BP2L1	7.61388	0.933103	9.34163	0.469887	-1.72775	-18.5502	1.75173e-64	3.77134e-63
PVRL2	12.2053	0.7112	10.8271	0.687738	1.37819	18.5475	1.81513e-64	3.90307e-63
KAT2B	8.05881	0.879474	9.72437	0.676277	-1.66556	-18.5439	1.90297e-64	4.087e-63
NME1	10.8679	0.892248	9.21089	0.488923	1.65696	18.5432	1.92233e-64	4.12355e-63
PKD1L2	3.3567	1.54207	6.38795	1.68658	-3.03125	-18.54	2.00263e-64	4.29058e-63
MAS1L	0.408245	0.630255	1.76537	1.05592	-1.35712	-18.5356	2.12374e-64	4.54455e-63
CBX4	9.86402	0.866193	8.22266	0.675147	1.64136	18.5342	2.16334e-64	4.62369e-63
SSPN	8.96061	1.11638	11.0134	0.468411	-2.05277	-18.5277	2.35604e-64	5.02944e-63
LRFN5	3.11038	1.58778	6.05787	0.900591	-2.94749	-18.5258	2.41318e-64	5.14521e-63
LOXL4	5.9103	1.67759	9.00116	0.781446	-3.09086	-18.5207	2.58295e-64	5.50052e-63
SAMD4A	7.8216	1.03971	9.79113	0.822257	-1.96952	-18.5141	2.81603e-64	5.98246e-63
DNAJC18	6.76167	0.690449	8.03976	0.359898	-1.27808	-18.5033	3.2444e-64	6.88421e-63
PTGER4	6.9398	1.10297	8.97975	0.584297	-2.03994	-18.501	3.3421e-64	7.08301e-63
PYCRL	9.16754	0.905924	7.45496	0.711535	1.71258	18.481	4.34665e-64	9.20094e-63
CCDC82	7.33139	1.00976	9.1842	0.43141	-1.85281	-18.4767	4.59597e-64	9.71704e-63
CMTM5	0.909392	1.45214	3.67538	1.25631	-2.76598	-18.4763	4.62103e-64	9.75833e-63
CDKN1C	7.519	1.21315	9.77603	0.766251	-2.25704	-18.4641	5.41957e-64	1.14309e-62
SHISA3	1.5792	1.43849	4.35368	1.40708	-2.77448	-18.4621	5.5652e-64	1.17241e-62
TNNT3	2.32493	2.10443	6.352	1.93172	-4.02707	-18.4549	6.1199e-64	1.28773e-62
CXCL12	10.7221	1.28719	13.0983	0.699511	-2.37614	-18.4515	6.39821e-64	1.34469e-62
CES4	1.58673	1.56544	4.67602	1.81713	-3.0893	-18.4438	7.07675e-64	1.48553e-62
D4S234E	4.07129	1.9227	7.66908	1.38261	-3.59779	-18.432	8.25954e-64	1.7297e-62
FAM149A	5.21035	1.34712	7.72932	0.971992	-2.51897	-18.4093	1.11151e-63	2.32495e-62
CDCA2	6.78389	1.34011	4.24085	1.16021	2.54304	18.4044	1.18566e-63	2.47711e-62
C13orf15	8.2751	0.896002	9.9619	0.706637	-1.6868	-18.3977	1.29357e-63	2.69937e-62
C19orf12	8.77248	0.568279	9.96336	0.883812	-1.19088	-18.397	1.30553e-63	2.72112e-62
CDC6	8.44188	1.3269	5.95443	1.00297	2.48745	18.3937	1.36356e-63	2.8387e-62
ODZ1	3.0753	1.65925	6.12884	0.916032	-3.05353	-18.3875	1.47944e-63	3.07634e-62
PARK2	4.98389	1.22443	7.22579	0.584121	-2.2419	-18.3858	1.51161e-63	3.13952e-62
SLC7A3	1.7185	1.90015	5.46722	2.24826	-3.74872	-18.3828	1.57352e-63	3.26426e-62
C4BPA	1.68156	1.99244	5.59574	2.30811	-3.91419	-18.3691	1.88093e-63	3.8974e-62
NBLA00301	3.12997	1.27104	5.47167	0.732865	-2.3417	-18.3682	1.90285e-63	3.9382e-62
PKD2	8.85155	0.938694	10.5756	0.497898	-1.72406	-18.3656	1.96963e-63	4.07164e-62
EMP1	11.3883	1.01343	13.3262	0.96431	-1.93786	-18.3541	2.28867e-63	4.72563e-62
CCDC36	3.15477	1.11708	5.31446	1.16623	-2.15969	-18.3475	2.49457e-63	5.14476e-62
C11orf87	0.722976	0.834904	2.45346	1.26361	-1.73049	-18.3457	2.55487e-63	5.26297e-62
E2F8	6.14676	1.55676	3.18413	1.43278	2.96262	18.3445	2.59438e-63	5.33814e-62
NUDT16L1	9.59057	0.709586	8.2692	0.498413	1.32137	18.3397	2.76492e-63	5.68241e-62
RRN3P1	3.56813	1.20959	5.80492	0.776784	-2.23679	-18.3356	2.91338e-63	5.98055e-62
WHAMML2	4.34984	1.02506	6.25711	0.725473	-1.90728	-18.3349	2.94331e-63	6.03497e-62
FANCI	9.73904	0.895514	8.06949	0.653442	1.66955	18.3273	3.25045e-63	6.65701e-62
HYAL1	4.95252	1.22842	7.21289	0.72747	-2.26037	-18.3218	3.49349e-63	7.14648e-62
SNCA	5.00942	1.20378	7.22498	0.722844	-2.21556	-18.3133	3.90315e-63	7.97526e-62
DPT	8.52628	1.93901	12.1892	1.69326	-3.66296	-18.3114	4.00024e-63	8.16419e-62
PM20D1	1.20489	0.938464	3.1395	1.40455	-1.93462	-18.3009	4.58517e-63	9.33639e-62
AMOTL2	10.2792	0.853153	11.8582	0.569347	-1.57901	-18.2976	4.78715e-63	9.73645e-62
UNC5B	10.4964	1.00692	8.65632	0.517623	1.84007	18.2975	4.79753e-63	9.74632e-62
MTMR10	9.3995	0.586782	10.5007	0.466805	-1.10124	-18.297	4.8291e-63	9.79918e-62
TENC1	10.4616	0.83145	12.0336	0.730072	-1.57206	-18.296	4.88873e-63	9.9088e-62
ROGDI	9.69289	0.834952	8.09725	0.810155	1.59564	18.2936	5.04894e-63	1.02218e-61
UTRN	10.8182	0.968751	12.5974	0.566577	-1.77919	-18.2901	5.28236e-63	1.06821e-61
PTGFR	4.41704	1.9043	7.91215	1.12026	-3.4951	-18.2882	5.41167e-63	1.09311e-61
EGFR	7.04522	2.04356	10.7383	0.725432	-3.69313	-18.2844	5.68929e-63	1.14787e-61
SLCO1C1	1.59806	0.994768	3.59729	1.33493	-1.99923	-18.283	5.79482e-63	1.16783e-61
SPARCL1	11.9729	1.20805	14.1552	0.415031	-2.18236	-18.2789	6.11717e-63	1.23139e-61
MOBKL2B	7.18922	1.26105	9.46628	0.445875	-2.27706	-18.2627	7.55578e-63	1.51924e-61
SCAMP3	10.992	0.556709	9.97939	0.247588	1.01256	18.2516	8.72448e-63	1.75224e-61
DCTPP1	10.1746	0.652192	8.96333	0.471241	1.21125	18.249	9.02722e-63	1.81098e-61
TNFRSF10D	5.44552	1.30961	7.8245	0.62567	-2.37897	-18.2417	9.93135e-63	1.9901e-61
PROKR1	0.498924	0.947342	2.51637	1.62468	-2.01745	-18.2275	1.19504e-62	2.38927e-61
ZC3H12C	6.58051	1.15049	8.67683	0.629284	-2.09632	-18.2051	1.60016e-62	3.19561e-61
DMRT2	3.10657	1.53843	6.03575	1.5244	-2.92918	-18.1977	1.76205e-62	3.51494e-61
HSD11B1	4.42818	1.52671	7.43852	1.91245	-3.01034	-18.188	2.00126e-62	3.98761e-61
CRYBG3	7.28134	1.39544	9.81277	0.703422	-2.53142	-18.1856	2.06317e-62	4.10634e-61
TMTC1	8.04367	1.78577	11.2528	0.647214	-3.20909	-18.1732	2.42432e-62	4.8197e-61
GFRA2	3.27088	1.5315	6.12886	1.27333	-2.85798	-18.1696	2.54048e-62	5.04495e-61
LCN10	1.95454	1.53181	4.76338	1.00396	-2.80884	-18.1654	2.6838e-62	5.32357e-61
CENPE	8.08757	1.26789	5.76599	0.816678	2.32158	18.1538	3.1216e-62	6.18505e-61
PLAC1	3.85726	1.78924	0.640541	0.709281	3.21672	18.1484	3.34985e-62	6.62984e-61
CD302	9.37979	0.969328	11.1621	0.669117	-1.78231	-18.146	3.45383e-62	6.82798e-61
SCTR	0.38447	0.527338	1.65682	1.2747	-1.27235	-18.1437	3.56113e-62	7.03223e-61
LRRN3	4.3341	1.64427	7.37545	1.25209	-3.04135	-18.1422	3.62922e-62	7.1587e-61
SLC25A27	4.99205	1.6255	7.91595	0.669028	-2.92391	-18.1412	3.6792e-62	7.24918e-61
ETS2	9.7263	0.856794	11.2918	0.530189	-1.56551	-18.1404	3.71638e-62	7.31426e-61
ADCY4	6.817	1.16703	8.93789	0.663825	-2.12088	-18.1276	4.39279e-62	8.6359e-61
PELI2	6.86622	1.22013	9.05648	0.468309	-2.19026	-18.1263	4.46278e-62	8.76374e-61
TLR4	8.17235	1.0059	10.039	0.801665	-1.86667	-18.1243	4.5847e-62	8.99314e-61
PRDM8	4.02167	1.10216	6.01663	0.5709	-1.99497	-18.1217	4.73974e-62	9.28695e-61
HADH	10.4785	0.54605	11.5888	0.798939	-1.11026	-18.1142	5.22847e-62	1.02332e-60
NCRNA00092	1.41176	1.60075	4.34676	1.10655	-2.935	-18.1058	5.8277e-62	1.13934e-60
CCL11	3.72157	1.59108	0.851747	0.774418	2.86982	18.1054	5.85908e-62	1.1442e-60
FKBP4	12.9518	0.780408	11.4802	0.739059	1.47165	18.0984	6.4139e-62	1.25117e-60
NFAT5	10.1861	0.675835	11.4325	0.498065	-1.24632	-18.0982	6.43229e-62	1.25337e-60
AKR1C2	5.82559	2.55021	10.5434	2.01216	-4.71776	-18.0981	6.44177e-62	1.25384e-60
POLQ	6.72384	1.2645	4.3867	0.982629	2.33713	18.0952	6.69129e-62	1.30097e-60
AASS	7.36552	1.14076	9.42776	0.598394	-2.06224	-18.0915	7.02364e-62	1.36259e-60
ASB1	8.42822	0.550891	9.42873	0.306842	-1.00051	-18.0837	7.76731e-62	1.5052e-60
ZFP36	10.8323	1.27594	13.2439	1.2551	-2.41158	-18.0771	8.4663e-62	1.63886e-60
MT1M	4.07835	1.66428	7.09162	0.943682	-3.01327	-18.0696	9.3316e-62	1.80438e-60
TRIB3	9.79725	0.89385	8.09996	0.914543	1.69729	18.0607	1.04798e-61	2.02419e-60
GPRASP2	7.76062	0.810286	9.21765	0.374115	-1.45703	-18.0579	1.08593e-61	2.09519e-60
ASAM	7.23326	1.50575	10.008	1.15934	-2.77469	-18.0575	1.09119e-61	2.10303e-60
AP1M2	11.0658	0.903164	8.72735	2.55451	2.33849	18.0429	1.31936e-61	2.54003e-60
SFRP1	8.96087	2.96956	14.2529	1.03113	-5.29199	-18.0396	1.37821e-61	2.65044e-60
JTB	11.7127	0.58435	10.6622	0.264127	1.05053	18.0379	1.40755e-61	2.7039e-60
STRBP	10.2859	0.577591	9.19121	0.580968	1.09472	18.0362	1.43915e-61	2.7616e-60
MAD2L1	8.38475	1.0197	6.52619	0.675789	1.85856	18.0346	1.47041e-61	2.81852e-60
FLJ42875	1.46053	1.17349	3.6195	0.897662	-2.15897	-18.0324	1.51148e-61	2.89412e-60
SOD3	7.36382	1.64878	10.3792	1.16723	-3.01535	-18.0319	1.52188e-61	2.91087e-60
PROC	3.37762	1.29967	1.03565	0.687846	2.34197	18.0306	1.5481e-61	2.95782e-60
SH3TC2	4.47006	1.29844	6.80835	0.682006	-2.33829	-18.0245	1.67512e-61	3.19703e-60
LOC92659	7.21041	0.908238	5.45583	1.0613	1.75458	18.0223	1.72486e-61	3.2884e-60
ISM1	7.10383	1.55253	9.89457	0.789646	-2.79074	-18.0163	1.8648e-61	3.55138e-60
RPUSD1	9.0751	0.722949	7.74291	0.56866	1.33218	17.9997	2.31151e-61	4.39735e-60
LRRC8C	8.32198	0.867918	9.91227	0.642655	-1.59029	-17.992	2.55459e-61	4.85455e-60
TMEM9	11.5297	0.633299	10.3661	0.479827	1.16357	17.9891	2.65075e-61	5.03187e-60
FCER2	1.20004	1.43832	4.03156	1.89932	-2.83152	-17.9757	3.15722e-61	5.98685e-60
KPNA2	11.2872	0.957864	9.56323	0.525892	1.72394	17.9729	3.27196e-61	6.19777e-60
CDH5	9.53853	0.939116	11.281	0.819045	-1.74242	-17.9714	3.33543e-61	6.31122e-60
FGD4	8.05617	0.857457	9.6005	0.486595	-1.54434	-17.9553	4.10814e-61	7.765e-60
CNRIP1	7.08882	0.950986	8.88414	0.974946	-1.79532	-17.9539	4.18433e-61	7.90056e-60
EHD2	10.7564	0.932563	12.5224	0.982326	-1.76596	-17.9433	4.80067e-61	9.05459e-60
PHF17	9.43774	0.64615	10.6081	0.409728	-1.17034	-17.9399	5.01862e-61	9.45557e-60
HFM1	1.04236	1.07529	3.04443	0.990151	-2.00207	-17.9388	5.09174e-61	9.58311e-60
FLAD1	10.2208	0.608857	9.1333	0.278881	1.08753	17.9193	6.55455e-61	1.23231e-59
FRMPD4	0.598324	0.836398	2.21337	1.0079	-1.61504	-17.9178	6.68166e-61	1.25487e-59
JPH2	5.72119	1.62076	8.66696	1.16067	-2.94577	-17.9062	7.76567e-61	1.45691e-59
IGSF9	9.68889	1.11453	7.2013	2.31809	2.48759	17.9025	8.14103e-61	1.52409e-59
PGM5P2	1.25793	0.848227	2.82824	0.750071	-1.57031	-17.9026	8.13299e-61	1.52409e-59
ZC3H12B	4.34762	1.0246	6.18141	0.545581	-1.83379	-17.8974	8.70069e-61	1.62714e-59
EPN3	9.54194	1.24792	6.9221	2.17354	2.61984	17.8925	9.27039e-61	1.73185e-59
LCN6	0.734997	1.03396	2.72845	1.24981	-1.99345	-17.8889	9.71069e-61	1.81218e-59
GINS2	8.32092	1.13527	6.20271	1.09367	2.1182	17.887	9.95177e-61	1.85521e-59
ADAMTSL4	7.19983	1.2506	9.50283	1.07003	-2.303	-17.8788	1.10589e-60	2.05791e-59
STAT5A	9.71146	0.90857	11.3658	0.675184	-1.65438	-17.877	1.13242e-60	2.1044e-59
PSRC1	7.45153	0.914277	5.74732	0.876311	1.70421	17.8729	1.19444e-60	2.21731e-59
E2F7	6.0951	1.38886	3.54561	1.15613	2.54949	17.8694	1.24926e-60	2.31665e-59
TIMELESS	9.84628	0.746815	8.50968	0.409262	1.3366	17.8608	1.39684e-60	2.5876e-59
ARRDC3	10.5181	0.89038	12.1551	0.761272	-1.63706	-17.8407	1.81033e-60	3.34655e-59
AOX1	6.43694	1.83941	9.76555	1.30669	-3.32861	-17.8395	1.83873e-60	3.3955e-59
SLC10A6	2.6246	1.38121	5.13353	1.03206	-2.50893	-17.8392	1.84443e-60	3.40246e-59
HIST1H2BD	9.26137	1.39691	6.69659	1.18844	2.56478	17.8374	1.88819e-60	3.47956e-59
TNFRSF8	3.73261	1.15065	5.83123	0.907665	-2.09863	-17.8324	2.01425e-60	3.70798e-59
TEK	7.49359	1.19544	9.66563	0.902176	-2.17204	-17.8275	2.14767e-60	3.94948e-59
ALS2CR4	9.06168	0.65887	10.264	0.516743	-1.20234	-17.8224	2.29117e-60	4.20899e-59
PHKG1	2.96962	1.43266	5.59067	1.18841	-2.62106	-17.8156	2.50349e-60	4.59424e-59
WSCD2	3.15917	1.74907	6.26335	0.865332	-3.10417	-17.8066	2.81261e-60	5.15616e-59
C17orf91	6.75824	0.800924	8.29207	0.954861	-1.53383	-17.8008	3.03018e-60	5.5435e-59
KANK3	6.07337	1.07829	8.01863	0.750755	-1.94526	-17.7977	3.15397e-60	5.76399e-59
TF	5.61483	2.75714	10.4967	1.30808	-4.88186	-17.793	3.35125e-60	6.11819e-59
MEIS2	6.5171	1.24474	8.71372	0.513001	-2.19663	-17.7922	3.3843e-60	6.17215e-59
CCL23	1.24408	1.10059	3.39324	1.46941	-2.14916	-17.7858	3.67447e-60	6.69443e-59
C20orf160	5.8368	0.98117	7.61666	0.746437	-1.77986	-17.7818	3.87325e-60	7.04932e-59
GPR109B	4.09449	1.27471	6.41436	1.01597	-2.31987	-17.7812	3.90212e-60	7.09455e-59
STXBP2	10.7346	0.777448	9.15549	1.22802	1.57911	17.7806	3.93092e-60	7.13955e-59
HPD	1.06493	1.40506	3.89827	2.1661	-2.83333	-17.7802	3.95066e-60	7.16803e-59
RXRG	1.66542	1.40773	4.34242	1.6295	-2.677	-17.7792	4.00224e-60	7.25416e-59
PPP2R2B	3.05231	1.31832	5.44267	1.01186	-2.39036	-17.7699	4.51265e-60	8.17091e-59
FBLN5	9.43389	1.27833	11.7121	0.75279	-2.27822	-17.7512	5.74795e-60	1.0397e-58
TMOD1	6.72957	1.22076	8.92294	0.834673	-2.19338	-17.7496	5.86091e-60	1.05904e-58
HOXA7	5.68194	1.60508	8.48739	0.434238	-2.80546	-17.7471	6.05378e-60	1.09277e-58
C5orf4	8.14204	1.60854	10.9592	0.514796	-2.81719	-17.7463	6.11822e-60	1.10328e-58
GRAMD1A	10.784	0.581801	9.73952	0.379176	1.04452	17.7447	6.24584e-60	1.12514e-58
NOTCH4	8.65781	0.850854	10.2105	0.711859	-1.55268	-17.7406	6.58309e-60	1.18469e-58
LAGE3	9.01635	0.935711	7.36669	0.408409	1.64967	17.7399	6.64899e-60	1.19533e-58
LOC144571	4.65904	0.786397	6.08938	0.633118	-1.43034	-17.7378	6.82473e-60	1.22567e-58
TACC1	10.2767	1.21779	12.467	0.858398	-2.19027	-17.7329	7.274e-60	1.30503e-58
SRL	3.51796	1.17117	5.71332	1.2546	-2.19536	-17.7274	7.81003e-60	1.39978e-58
CLEC5A	6.49866	1.58331	3.66107	1.06541	2.83758	17.7272	7.8217e-60	1.40045e-58
ECM2	8.35505	1.37012	10.903	1.38715	-2.54796	-17.7242	8.13857e-60	1.45423e-58
RCAN1	9.62182	1.28594	11.9347	0.919405	-2.31284	-17.7173	8.89602e-60	1.58637e-58
C9orf140	8.61822	1.14975	6.35715	1.61728	2.26108	17.7163	9.00472e-60	1.60413e-58
PPM1F	9.23754	0.683644	10.4461	0.330675	-1.20854	-17.7158	9.06566e-60	1.61336e-58
LOC283867	3.45812	1.64822	0.570834	0.595232	2.88729	17.7155	9.09675e-60	1.61726e-58
LOC285419	1.2597	0.976322	3.02389	0.744846	-1.76419	-17.7088	9.91893e-60	1.76166e-58
ALX4	1.65726	1.57712	4.58541	1.59912	-2.92815	-17.6942	1.19723e-59	2.12421e-58
FN1	16.1384	1.50407	13.4134	1.21957	2.725	17.6788	1.45961e-59	2.58715e-58
RUNDC3B	4.59159	1.24229	6.77974	0.605559	-2.18815	-17.6751	1.53053e-59	2.71012e-58
CCDC152	5.59197	1.03534	7.43018	0.613064	-1.83821	-17.6737	1.55916e-59	2.75807e-58
DNAH14	7.25531	0.838232	5.62396	1.13435	1.63135	17.6678	1.68165e-59	2.97176e-58
ROBLD3	10.1565	0.768291	8.78369	0.512705	1.37285	17.66	1.85949e-59	3.27946e-58
SLC20A1	10.5783	0.573	9.54495	0.430246	1.03337	17.6595	1.87083e-59	3.29617e-58
C13orf33	6.59772	1.41647	9.24004	1.51389	-2.64233	-17.6512	2.08172e-59	3.66407e-58
FBXL19	9.15651	0.697918	7.8463	0.774681	1.3102	17.6407	2.38189e-59	4.18407e-58
RBP7	7.1246	1.45299	9.71471	0.974624	-2.59011	-17.6345	2.57826e-59	4.52001e-58
DLC1	9.40232	1.06807	11.3436	0.922119	-1.94125	-17.6266	2.85687e-59	5.0035e-58
CFD	7.89735	1.97751	11.4713	1.61911	-3.57392	-17.6236	2.96556e-59	5.18871e-58
LOC728723	3.40044	0.809585	4.88511	0.762207	-1.48467	-17.6142	3.34951e-59	5.85468e-58
LMO2	7.78858	0.797173	9.20785	0.526544	-1.41926	-17.6085	3.60369e-59	6.29273e-58
CCDC19	6.23757	1.51339	3.53674	1.06713	2.70083	17.5994	4.05171e-59	7.06807e-58
RACGAP1	9.66965	0.907552	8.07869	0.430215	1.59096	17.5963	4.21508e-59	7.3458e-58
PRNP	10.3526	1.0775	12.2286	0.392453	-1.87592	-17.5945	4.31166e-59	7.50671e-58
CRIM1	10.9543	1.14595	12.9517	0.449664	-1.99735	-17.59	4.56768e-59	7.94461e-58
EGR2	7.81978	1.4428	10.4635	1.3922	-2.64376	-17.5682	6.04592e-59	1.05054e-57
ZNF48	8.25581	0.587611	7.17095	0.594898	1.08487	17.5564	7.03267e-59	1.22079e-57
GRM8	3.37118	1.29342	1.07397	0.877674	2.29722	17.5553	7.12896e-59	1.23629e-57
KIAA1045	2.39868	1.47085	4.97902	0.788849	-2.58034	-17.5471	7.91961e-59	1.37071e-57
CADM3	4.38927	2.30262	8.42082	1.19751	-4.03155	-17.5382	8.88008e-59	1.53439e-57
NR5A2	5.76764	1.08703	7.69508	0.726226	-1.92744	-17.5382	8.88264e-59	1.53439e-57
DGAT2	8.58756	1.69946	11.7967	2.04938	-3.20915	-17.5376	8.95283e-59	1.545e-57
TBX15	6.62289	1.16932	8.78168	1.21265	-2.15879	-17.5374	8.97146e-59	1.5467e-57
NUDT9P1	1.28331	0.794696	2.69431	0.542674	-1.411	-17.5251	1.05052e-58	1.80936e-57
GRK5	7.64722	0.801636	9.0807	0.607518	-1.43348	-17.5246	1.05775e-58	1.82002e-57
RDM1	3.54163	1.39927	1.07327	0.873875	2.46836	17.5207	1.11166e-58	1.91093e-57
ABCC9	7.30155	1.26132	9.65637	1.43067	-2.35482	-17.5089	1.29264e-58	2.21988e-57
TEF	9.08948	0.753981	10.4507	0.645545	-1.36123	-17.5074	1.31751e-58	2.26039e-57
PACSIN1	5.99661	1.32762	3.65666	0.828077	2.33995	17.5057	1.34646e-58	2.30781e-57
CST1	6.49294	3.26095	0.828569	1.415	5.66437	17.5008	1.43337e-58	2.45439e-57
MOSC1	7.92487	1.1713	10.1822	1.5943	-2.25734	-17.4851	1.75367e-58	2.99413e-57
SGCG	2.25441	2.02952	6.03252	2.28562	-3.77811	-17.4841	1.77544e-58	3.02836e-57
PPP2R1B	9.29045	0.638972	10.5802	1.04742	-1.28971	-17.4823	1.81609e-58	3.09471e-57
ICAM2	7.5918	0.938164	9.26501	0.715413	-1.67321	-17.4777	1.92662e-58	3.27991e-57
CRY2	9.90375	0.66471	11.0903	0.509059	-1.18654	-17.4672	2.20467e-58	3.74604e-57
EZR	12.8709	0.680845	11.5856	0.832262	1.28533	17.463	2.32773e-58	3.94903e-57
NR2F6	10.333	0.691853	9.11438	0.433546	1.21865	17.4629	2.32862e-58	3.94903e-57
YPEL4	3.51853	1.1209	5.49493	0.734142	-1.97639	-17.4614	2.37334e-58	4.02102e-57
CENPK	6.18287	1.04486	4.26183	1.08735	1.92104	17.4538	2.61787e-58	4.43106e-57
RAPGEF2	9.22575	0.641657	10.3584	0.420019	-1.1327	-17.4529	2.64843e-58	4.47849e-57
SOBP	5.92305	1.22194	8.03972	0.531586	-2.11667	-17.4403	3.1098e-58	5.25363e-57
NLRP1	7.36061	1.02453	9.15562	0.607185	-1.79502	-17.4393	3.14887e-58	5.31455e-57
SQLE	10.6394	1.12859	8.61036	0.974117	2.02908	17.4381	3.19886e-58	5.39376e-57
BMP5	1.77087	2.08166	5.40567	1.17459	-3.63481	-17.4326	3.43418e-58	5.78502e-57
PPARA	7.89198	1.03834	9.71163	0.632981	-1.81966	-17.4199	4.0364e-58	6.793e-57
MCM10	7.21851	1.51618	4.54526	1.04063	2.67325	17.418	4.1372e-58	6.95602e-57
PZP	0.79921	0.92946	2.47565	0.836703	-1.67644	-17.4144	4.32998e-58	7.27322e-57
LOC100240735	2.27025	0.913386	3.91437	0.811605	-1.64412	-17.4017	5.09171e-58	8.54459e-57
MND1	5.45282	1.44172	2.86199	1.27104	2.59082	17.3989	5.28045e-58	8.85291e-57
NFKBIL2	8.30501	1.09485	6.33207	0.990637	1.97294	17.3947	5.56741e-58	9.32515e-57
MAPK13	10.2252	0.65848	8.90425	1.07601	1.32092	17.392	5.76954e-58	9.65455e-57
ELANE	0.764128	0.962035	2.58052	1.2107	-1.81639	-17.3908	5.85847e-58	9.79407e-57
KLHL21	9.83974	0.771108	11.1754	0.35959	-1.33564	-17.3864	6.19438e-58	1.03458e-56
NCRNA00086	4.55128	1.60978	7.36529	0.98369	-2.81401	-17.384	6.38858e-58	1.06601e-56
CXCR2	2.7567	1.11478	4.79599	1.15323	-2.03929	-17.3816	6.58335e-58	1.09747e-56
CALCOCO1	10.4707	0.642686	11.5839	0.297015	-1.11321	-17.3775	6.93703e-58	1.15534e-56
KIF18A	6.90665	1.21665	4.73647	1.00225	2.17018	17.3774	6.94721e-58	1.15595e-56
CHPF	11.3636	0.810752	9.92346	0.629223	1.44013	17.3765	7.0268e-58	1.16809e-56
RNF125	7.51749	0.961212	9.21285	0.683333	-1.69536	-17.3728	7.37229e-58	1.22437e-56
OR52N4	0.703712	0.754999	2.07634	0.742809	-1.37262	-17.3689	7.74089e-58	1.28438e-56
FOXP2	3.1328	1.63224	6.01592	1.20197	-2.88312	-17.3681	7.81844e-58	1.29603e-56
HES6	6.89882	1.3686	4.50327	0.870271	2.39554	17.3676	7.86916e-58	1.30321e-56
SYNPO	10.3495	0.895439	12.0453	1.15279	-1.69582	-17.367	7.93544e-58	1.31295e-56
NPR2	7.07407	1.0723	8.95354	0.695412	-1.87947	-17.3662	8.01446e-58	1.32355e-56
CSRNP3	2.45153	1.40346	5.0406	1.55647	-2.58907	-17.3624	8.41395e-58	1.38822e-56
ABI3BP	7.40264	1.86543	10.6626	1.16626	-3.26	-17.3604	8.62802e-58	1.42221e-56
LPPR1	1.81465	1.78398	5.01453	1.58288	-3.19988	-17.358	8.90058e-58	1.46577e-56
KRT8	14.413	1.10504	12.0933	2.11449	2.31971	17.3541	9.35464e-58	1.53911e-56
GPR97	2.30566	1.37261	4.80297	1.38262	-2.49731	-17.3516	9.65993e-58	1.58786e-56
HIST2H2AA3	9.59546	1.52063	6.95181	0.88026	2.64365	17.3334	1.21848e-57	1.99917e-56
SV2B	4.49201	1.64357	7.34856	0.970441	-2.85655	-17.3134	1.57148e-57	2.57594e-56
FBXO43	4.14833	1.07655	2.24564	0.828669	1.90269	17.3121	1.59724e-57	2.61574e-56
NAT14	8.3558	0.991024	6.56145	0.975711	1.79435	17.3086	1.67052e-57	2.73321e-56
QKI	10.3544	0.807776	11.786	0.640386	-1.43162	-17.3075	1.69477e-57	2.77032e-56
CD200	7.55776	0.966717	9.23193	0.521609	-1.67416	-17.3066	1.71344e-57	2.79826e-56
PREX2	4.78305	1.86671	8.05668	1.31125	-3.27363	-17.3014	1.83169e-57	2.9886e-56
AHNAK	14.8399	0.963685	16.5282	0.658279	-1.68828	-17.3006	1.84905e-57	3.01414e-56
POU6F1	7.11375	0.793892	8.47515	0.305376	-1.3614	-17.2982	1.90806e-57	3.10746e-56
EBF2	3.65935	1.49805	6.35078	1.401	-2.69143	-17.2876	2.18398e-57	3.55355e-56
PFKFB4	7.9093	0.733511	6.54715	0.865747	1.36216	17.2856	2.24057e-57	3.64226e-56
HBA1	2.98936	2.66974	7.93926	3.1556	-4.94989	-17.2811	2.37128e-57	3.84766e-56
LEPREL1	6.68016	1.23835	8.81405	0.621596	-2.13388	-17.2744	2.58309e-57	4.1875e-56
AK3	10.1211	0.557099	11.1232	0.519715	-1.00203	-17.265	2.90972e-57	4.71268e-56
LRMP	5.3915	1.11963	7.34357	0.737536	-1.95208	-17.2604	3.08543e-57	4.99268e-56
KIF24	7.49666	0.790454	6.07588	0.746255	1.42078	17.2575	3.2032e-57	5.17851e-56
TRIP13	8.13864	1.19333	6.06728	0.729333	2.07135	17.2559	3.27082e-57	5.28299e-56
ECT2	9.93447	0.905517	8.36258	0.548639	1.57189	17.2554	3.29054e-57	5.30998e-56
PCNA	11.16	0.684328	9.97491	0.389029	1.1851	17.2491	3.56543e-57	5.74832e-56
TDO2	4.97569	1.84698	1.7468	1.30815	3.22889	17.2376	4.12765e-57	6.64868e-56
SLIT3	9.12268	1.32108	11.4494	1.0463	-2.32668	-17.2171	5.35463e-57	8.61719e-56
MSRB3	9.30144	1.22834	11.3991	0.516183	-2.0977	-17.2093	5.90978e-57	9.50194e-56
ROBO3	5.38075	1.34458	7.67801	0.606745	-2.29725	-17.1868	7.86772e-57	1.2627e-55
ABCA5	7.95182	1.16335	9.93566	0.493928	-1.98384	-17.1786	8.73775e-57	1.40106e-55
CENPL	7.65205	0.707874	6.44249	0.311967	1.20957	17.1736	9.30579e-57	1.49078e-55
PIK3R1	11.1336	1.04976	12.9371	0.566082	-1.80346	-17.1717	9.53249e-57	1.52572e-55
MIF	12.09	1.07896	10.1695	0.983051	1.92042	17.1682	9.97215e-57	1.59464e-55
CLIP4	7.55661	1.50062	10.1068	0.579373	-2.5502	-17.1625	1.0713e-56	1.71156e-55
RGN	3.91543	1.94194	7.19707	0.595632	-3.28164	-17.1354	1.51077e-56	2.4115e-55
VAV2	10.1871	0.589797	9.11431	0.640769	1.07274	17.1319	1.58024e-56	2.5201e-55
TUFT1	10.2302	0.798023	8.83712	0.596627	1.39312	17.1254	1.71501e-56	2.73256e-55
LOC644538	5.69732	1.00241	7.42761	0.636895	-1.73028	-17.1198	1.84269e-56	2.93334e-55
LRWD1	8.40015	0.665485	7.2196	0.601376	1.18055	17.1022	2.3007e-56	3.65915e-55
LILRB5	4.62416	1.54066	7.47763	1.91883	-2.85347	-17.1021	2.30494e-56	3.66259e-55
ARHGAP19	8.69436	0.597655	9.8011	0.737128	-1.10673	-17.0925	2.60373e-56	4.12624e-55
TPD52	12.5271	1.01832	10.6428	1.26245	1.88428	17.0919	2.62297e-56	4.153e-55
NVL	9.84045	0.680628	8.68304	0.29978	1.1574	17.0881	2.75385e-56	4.35631e-55
CLCN2	7.14104	0.754972	5.80093	0.695209	1.34011	17.087	2.79242e-56	4.41337e-55
CARD6	7.09029	0.966972	8.75663	0.617651	-1.66634	-17.085	2.86248e-56	4.52005e-55
FAM110A	9.24877	0.856979	7.71099	0.869529	1.53777	17.0839	2.90277e-56	4.57958e-55
RPL21P44	1.11079	0.701387	2.36696	0.701439	-1.25617	-17.0714	3.40045e-56	5.35995e-55
B4GALT3	10.5732	0.651899	9.45723	0.359241	1.11595	17.0694	3.48831e-56	5.49355e-55
BANK1	3.6622	1.55154	6.46257	1.66572	-2.80037	-17.0689	3.50924e-56	5.52158e-55
KIAA1199	7.76163	2.00695	4.31428	1.24846	3.44735	17.0688	3.51611e-56	5.52746e-55
ARL4A	8.27166	1.02802	10.0667	0.81363	-1.79507	-17.0646	3.70553e-56	5.82006e-55
AKR1C3	7.82927	1.55863	10.5506	1.24066	-2.7213	-17.0639	3.74022e-56	5.86933e-55
LOC399959	7.21642	1.3248	9.4515	0.470372	-2.23508	-17.0632	3.77293e-56	5.91539e-55
PITX1	8.19864	2.37543	4.06827	1.8119	4.13037	17.0559	4.13889e-56	6.47766e-55
C4orf12	3.93813	1.02319	5.69042	0.605851	-1.75229	-17.0471	4.62235e-56	7.2215e-55
CACNB3	9.6261	0.816404	8.19067	0.702279	1.43542	17.0468	4.64277e-56	7.24698e-55
TM4SF18	6.72634	1.28278	8.90376	0.615562	-2.17742	-17.0426	4.89617e-56	7.63578e-55
IGF1	7.71435	1.8496	10.8733	1.06645	-3.15896	-17.0337	5.47896e-56	8.53713e-55
PVRL3	4.91427	1.43277	7.36463	0.847836	-2.45036	-17.0327	5.54683e-56	8.63525e-55
DBX2	1.75383	1.36087	4.09965	0.930662	-2.34582	-17.031	5.67271e-56	8.82343e-55
CFLAR	9.17269	0.709072	10.4092	0.559028	-1.23652	-17.0297	5.76645e-56	8.96135e-55
TMEM71	4.35643	1.54586	7.0091	0.987323	-2.65267	-17.0245	6.15657e-56	9.55921e-55
LHX6	6.22716	1.27661	8.41888	0.820425	-2.19173	-17.0237	6.21927e-56	9.64806e-55
TMEM178	4.59357	1.37103	6.99654	1.16969	-2.40297	-17.0227	6.2978e-56	9.76132e-55
MEF2C	8.79949	0.86758	10.3024	0.640777	-1.50287	-17.0127	7.14851e-56	1.10702e-54
PLCXD3	3.19536	2.06193	6.73078	1.32126	-3.53542	-17.0111	7.29292e-56	1.12839e-54
HELLS	7.17353	1.0558	5.26289	1.18034	1.91064	17.0051	7.86648e-56	1.21607e-54
PDE11A	4.72078	1.57949	7.45717	1.19488	-2.73638	-17.0005	8.33693e-56	1.28654e-54
NFIB	10.1844	1.55753	12.7897	0.398639	-2.60532	-16.993	9.16843e-56	1.41362e-54
LOC285830	4.20952	1.07489	6.03361	0.553487	-1.82409	-16.9928	9.18664e-56	1.41519e-54
HIST1H2AM	3.43025	1.48661	0.903655	0.807761	2.5266	16.9909	9.41742e-56	1.44948e-54
LRRC15	10.7803	2.03598	7.2618	1.522	3.51846	16.976	1.13543e-55	1.74607e-54
TMEM206	7.91577	0.685062	6.74046	0.446472	1.17531	16.9715	1.20297e-55	1.84832e-54
FEN1	9.58472	0.798633	8.22663	0.44251	1.35809	16.9667	1.27786e-55	1.96169e-54
ID4	7.39007	1.95035	10.6665	0.76794	-3.27646	-16.9618	1.35967e-55	2.08545e-54
LPAR6	9.00219	0.7932	10.3542	0.467166	-1.352	-16.9598	1.39382e-55	2.13598e-54
TRAF2	9.00409	0.648685	7.82068	0.772483	1.18341	16.9478	1.62097e-55	2.48192e-54
DLG3	10.738	0.53921	9.60894	1.09001	1.12905	16.9443	1.69462e-55	2.59245e-54
EFCAB1	2.71113	1.80304	5.90031	1.7579	-3.18918	-16.9404	1.78094e-55	2.72214e-54
SHANK3	8.64665	0.834646	10.1124	0.759852	-1.46575	-16.9309	2.0075e-55	3.06578e-54
APOLD1	8.97026	1.05444	10.9267	1.39869	-1.95639	-16.9201	2.29917e-55	3.50514e-54
DENND2C	4.56201	1.07963	6.39699	0.64024	-1.83498	-16.9189	2.33443e-55	3.55276e-54
RECK	7.85062	1.2271	9.94117	0.767487	-2.09055	-16.917	2.39315e-55	3.63899e-54
EDN3	2.40861	2.55648	6.94385	2.59364	-4.53523	-16.9095	2.62756e-55	3.99199e-54
PTPRM	9.41668	0.932331	11.0521	0.862008	-1.6354	-16.8879	3.44966e-55	5.23649e-54
TINAGL1	8.70569	1.41827	11.0677	0.429159	-2.36197	-16.8858	3.54425e-55	5.37544e-54
CCDC85A	5.31091	1.45224	7.7965	1.03101	-2.48558	-16.8704	4.30165e-55	6.51857e-54
IRX6	3.42545	1.92238	6.74747	1.55657	-3.32202	-16.8672	4.47881e-55	6.78122e-54
ADHFE1	5.88744	1.33702	8.16911	0.912997	-2.28166	-16.8619	4.78867e-55	7.24415e-54
RUNX1T1	4.58636	1.52661	7.15797	0.806277	-2.57161	-16.8596	4.92615e-55	7.44574e-54
FAT4	7.20421	1.44974	9.64389	0.745854	-2.43969	-16.8585	4.99556e-55	7.53774e-54
STBD1	8.82345	0.791179	10.3413	1.23184	-1.51786	-16.858	5.02951e-55	7.5825e-54
SLC25A39	11.4545	0.662474	10.332	0.384427	1.12243	16.8579	5.03613e-55	7.586e-54
IFNGR1	10.518	0.676219	11.6584	0.356039	-1.14039	-16.8493	5.61315e-55	8.44795e-54
KCNJ2	6.46114	1.0841	8.31497	0.770749	-1.85383	-16.8472	5.76166e-55	8.66409e-54
ECE2	7.61094	0.974905	5.94609	0.677666	1.66485	16.8459	5.85617e-55	8.79122e-54
TMEM132A	10.5465	1.24477	8.33927	1.29072	2.20726	16.8459	5.85584e-55	8.79122e-54
NDN	7.77044	1.20705	9.81804	0.75608	-2.04761	-16.8429	6.0803e-55	9.11993e-54
RGS2	8.32392	1.55375	10.998	1.21747	-2.67407	-16.842	6.14911e-55	9.21532e-54
LOC400804	0.529794	0.635046	1.73089	0.933981	-1.20109	-16.8419	6.1625e-55	9.22754e-54
DUSP1	10.9527	1.41261	13.358	0.952392	-2.40535	-16.839	6.38629e-55	9.55454e-54
SAMD1	8.41947	0.603216	7.37593	0.490573	1.04354	16.8373	6.52877e-55	9.75943e-54
MGLL	10.2489	1.2448	12.4306	1.17919	-2.18165	-16.8365	6.59542e-55	9.85072e-54
AMPD1	1.65872	1.61223	4.6295	2.12594	-2.97077	-16.8316	7.01291e-55	1.04654e-53
ARAP3	7.88114	0.840324	9.2994	0.473695	-1.41825	-16.8296	7.19349e-55	1.07258e-53
PLEKHH2	6.5903	1.52646	9.14197	0.683812	-2.55167	-16.8213	7.97874e-55	1.18866e-53
C8orf51	6.46223	0.919137	4.84968	0.889031	1.61255	16.8044	9.86746e-55	1.4688e-53
PCDH18	8.40505	1.2508	10.5494	0.960138	-2.1443	-16.8	1.04307e-54	1.55134e-53
KCNH8	2.27556	1.85157	5.51953	1.78905	-3.24397	-16.798	1.06907e-54	1.58867e-53
PTPN21	8.25698	1.03421	9.98024	0.429001	-1.72326	-16.7916	1.15865e-54	1.72034e-53
PSENEN	10.5311	0.630329	9.46724	0.366547	1.06383	16.7868	1.23135e-54	1.82675e-53
MYCBP2	10.3479	0.891816	11.8731	0.664914	-1.52521	-16.786	1.244e-54	1.84396e-53
EPM2A	7.01988	0.600145	8.08703	0.642424	-1.06715	-16.7855	1.25164e-54	1.85374e-53
DDR2	7.11121	1.61958	9.92788	1.48429	-2.81666	-16.7724	1.47475e-54	2.18233e-53
SLC16A3	9.23736	1.30168	6.99298	1.0938	2.24438	16.7689	1.54108e-54	2.27858e-53
RAD51AP1	7.41005	1.07461	5.57516	0.801581	1.83489	16.7653	1.61331e-54	2.38337e-53
USP53	9.39655	0.899211	10.9098	0.52443	-1.51328	-16.7588	1.74871e-54	2.58125e-53
SLC37A1	9.34223	0.675011	8.14678	0.716063	1.19545	16.7483	1.99718e-54	2.94309e-53
SEPP1	12.1448	1.17054	14.0944	0.537453	-1.94956	-16.7428	2.13984e-54	3.14805e-53
ACAD11	8.17182	0.638909	9.28855	0.611926	-1.11673	-16.7403	2.20568e-54	3.24222e-53
HMGB3	10.2589	1.23186	8.20713	0.572777	2.0518	16.7386	2.25444e-54	3.31114e-53
SIRPA	9.80387	0.963852	11.4042	0.399536	-1.60036	-16.7301	2.50924e-54	3.68231e-53
WHAMML1	5.5242	0.952118	7.14202	0.683272	-1.61781	-16.7254	2.66127e-54	3.90217e-53
DDX39	9.96528	0.788847	8.64713	0.402349	1.31815	16.7249	2.676e-54	3.92051e-53
KLHL10	1.24544	0.735128	2.52265	0.680166	-1.27722	-16.7145	3.05095e-54	4.46242e-53
CBX8	7.34396	0.820654	5.89078	0.889671	1.45317	16.7059	3.39786e-54	4.96571e-53
C20orf151	7.15325	1.1082	4.93438	2.06374	2.21887	16.7046	3.45195e-54	5.03643e-53
RTKN	9.82605	0.614127	8.6956	0.828303	1.13045	16.7043	3.46601e-54	5.05276e-53
AIFM2	8.42307	0.776623	9.90662	1.23476	-1.48355	-16.6936	3.96366e-54	5.77346e-53
HSF2BP	5.17971	0.774961	3.83193	0.736188	1.34778	16.6853	4.39905e-54	6.40237e-53
E2F2	7.01663	1.25122	4.85188	1.14596	2.16475	16.6825	4.55526e-54	6.61881e-53
ZAK	10.3317	0.868069	11.8289	0.767241	-1.49719	-16.6806	4.66068e-54	6.76641e-53
DAAM2	8.20161	1.14333	10.1528	0.905017	-1.95115	-16.6805	4.66781e-54	6.7712e-53
PNRC1	10.3505	0.675723	11.4868	0.418966	-1.13635	-16.6798	4.71056e-54	6.82761e-53
C2CD2	9.24749	0.882471	10.8442	1.10614	-1.5967	-16.6748	5.01403e-54	7.26151e-53
C2orf58	2.2373	1.07873	4.04314	0.631369	-1.80584	-16.6745	5.03435e-54	7.28495e-53
SNRPB	11.5699	0.689798	10.4042	0.470829	1.16565	16.6709	5.26425e-54	7.6114e-53
POLE2	6.40534	0.951308	4.7651	0.845553	1.64023	16.6696	5.35209e-54	7.73206e-53
TMBIM1	11.2659	0.618066	12.368	0.707869	-1.10211	-16.667	5.52771e-54	7.97925e-53
C19orf40	6.02286	0.596153	4.99944	0.501691	1.02342	16.6566	6.29634e-54	9.07393e-53
LARP6	7.23856	1.11369	9.10796	0.704351	-1.8694	-16.6555	6.38811e-54	9.19867e-53
TLE4	7.40685	1.13333	9.28885	0.564473	-1.882	-16.6494	6.8953e-54	9.92092e-53
FGF7	6.93201	1.36762	9.21642	0.79558	-2.28441	-16.6481	7.00153e-54	1.00656e-52
TSEN54	9.13747	0.686015	7.95838	0.592761	1.17908	16.6465	7.14173e-54	1.02588e-52
PPP1CA	11.7607	0.636816	10.6926	0.388327	1.06811	16.6454	7.24583e-54	1.03998e-52
CCDC78	6.04628	1.86725	2.90078	1.28256	3.1455	16.6434	7.42692e-54	1.06511e-52
CTHRC1	10.5675	1.3805	8.1916	1.23559	2.37591	16.637	8.04803e-54	1.15325e-52
ADM2	7.82827	1.18429	5.67047	1.56582	2.1578	16.6295	8.83834e-54	1.26444e-52
CPA2	0.532803	0.85174	2.18503	1.45756	-1.65223	-16.6105	1.12023e-53	1.60005e-52
SGK1	9.59746	1.02015	11.3607	0.962025	-1.76327	-16.6077	1.16054e-53	1.65628e-52
ESRP1	11.5434	0.867233	9.34337	2.74236	2.2	16.6053	1.19676e-53	1.70659e-52
FBXO40	0.329936	0.593623	1.81073	1.82233	-1.48079	-16.6	1.27771e-53	1.81908e-52
SEMA3D	5.42759	1.94989	8.64135	0.855641	-3.21376	-16.5976	1.31687e-53	1.87333e-52
FBXL6	8.82909	0.893644	7.33704	0.545641	1.49205	16.5895	1.45621e-53	2.06821e-52
MMP1	6.51512	2.87453	1.76034	1.46297	4.75477	16.5834	1.57322e-53	2.23261e-52
AMOTL1	9.42267	1.22055	11.4208	0.392518	-1.99818	-16.5822	1.5964e-53	2.26368e-52
KCTD8	0.534364	0.766723	1.93411	1.03385	-1.39975	-16.5817	1.60581e-53	2.2752e-52
ZEB2	8.92316	1.00809	10.6875	1.06536	-1.76431	-16.5786	1.66847e-53	2.36019e-52
PHKG2	9.35591	0.640188	8.29162	0.351382	1.06429	16.5782	1.67749e-53	2.37106e-52
TIMM17B	9.51083	0.692975	8.34813	0.462213	1.1627	16.5761	1.72308e-53	2.43354e-52
MCM2	10.1218	0.937719	8.52713	0.76556	1.59463	16.5722	1.80907e-53	2.55294e-52
TMEM140	8.7592	0.568544	9.80454	0.790645	-1.04534	-16.5716	1.82105e-53	2.5678e-52
ADD3	9.80683	1.1679	11.7328	0.545571	-1.92596	-16.5689	1.88363e-53	2.65392e-52
PIWIL4	4.39657	1.19602	6.38794	0.72324	-1.99137	-16.5611	2.07705e-53	2.92411e-52
DLK1	1.46307	2.53635	5.90016	2.71104	-4.4371	-16.5585	2.14586e-53	3.01857e-52
YDJC	8.24684	0.799969	6.82907	0.924622	1.41778	16.5576	2.17012e-53	3.05026e-52
PLA2R1	7.91768	1.02332	9.64065	0.746585	-1.72297	-16.5566	2.19725e-53	3.08593e-52
THSD7B	3.80148	1.74597	6.68677	0.903552	-2.88529	-16.554	2.26881e-53	3.18391e-52
HOXA9	4.9679	1.63313	7.65812	0.773898	-2.69022	-16.5499	2.3888e-53	3.34697e-52
KLF10	10.4466	0.74624	11.7398	0.736124	-1.29318	-16.5498	2.39251e-53	3.34951e-52
ASXL3	2.37364	1.56626	4.94901	0.701994	-2.57537	-16.5463	2.49821e-53	3.49472e-52
C8orf30A	9.67114	0.771703	8.39583	0.389318	1.27531	16.546	2.50832e-53	3.50609e-52
MET	8.00921	1.72586	10.8232	0.495207	-2.81396	-16.5454	2.52617e-53	3.52825e-52
ABCB8	9.49163	0.606458	8.46066	0.494699	1.03097	16.5417	2.64411e-53	3.69004e-52
CDH13	8.11851	0.905114	9.64932	0.706956	-1.53081	-16.5416	2.65031e-53	3.69577e-52
INTS7	9.67179	0.651955	8.59225	0.344288	1.07954	16.5391	2.7332e-53	3.80836e-52
FLJ10357	9.61737	0.781367	10.9225	0.505602	-1.30511	-16.5381	2.76676e-53	3.85208e-52
FAM55D	0.577014	0.770395	1.98258	1.05293	-1.40557	-16.525	3.2564e-53	4.53021e-52
CLSPN	6.40822	1.57693	3.76412	1.12411	2.6441	16.524	3.29807e-53	4.58458e-52
WIF1	2.38427	2.93099	7.42408	2.78878	-5.03981	-16.5185	3.53161e-53	4.90149e-52
GALE	9.33899	0.916652	7.79037	0.719521	1.54862	16.5174	3.58219e-53	4.96778e-52
FAM72D	5.57602	1.33006	3.36213	0.844047	2.21389	16.517	3.59841e-53	4.98637e-52
IL6	3.8114	2.0638	7.38064	2.06616	-3.56924	-16.5113	3.86428e-53	5.35059e-52
KRT18	13.8701	1.07428	11.6953	2.13586	2.17477	16.5111	3.8756e-53	5.36206e-52
TRPC6	5.7536	1.07951	7.53955	0.61021	-1.78595	-16.5048	4.19073e-53	5.78446e-52
PGP	8.76556	0.723249	7.56005	0.467106	1.20551	16.5006	4.41454e-53	6.08387e-52
HOXA3	4.92606	1.57006	7.48093	0.485285	-2.55487	-16.496	4.67456e-53	6.43719e-52
FOS	11.1542	1.82467	14.2317	1.44458	-3.07751	-16.4931	4.84572e-53	6.66768e-52
FAM72B	6.54049	1.26937	4.44311	0.723829	2.09738	16.4816	5.59222e-53	7.68887e-52
RIBC2	5.41135	1.13062	3.44455	1.19572	1.9668	16.4801	5.70073e-53	7.83196e-52
TYMS	9.01883	1.10474	7.14905	0.916173	1.86978	16.4763	5.97326e-53	8.19999e-52
C21orf62	0.892435	0.759104	2.2222	0.839306	-1.32976	-16.4754	6.04426e-53	8.29102e-52
GPM6B	6.98498	1.48357	9.47768	1.13678	-2.49269	-16.4708	6.40045e-53	8.77279e-52
MRPL14	9.76254	0.725649	8.55546	0.467551	1.20708	16.4698	6.47572e-53	8.86907e-52
RCC1	9.66156	0.880043	8.06464	1.19505	1.59691	16.4633	7.02532e-53	9.61434e-52
C6orf174	4.59103	1.37823	6.85559	0.705976	-2.26455	-16.4621	7.13374e-53	9.75516e-52
SALL4	4.75271	1.45977	2.34215	0.85891	2.41056	16.4509	8.19622e-53	1.11994e-51
IFFO2	8.92163	0.986322	10.649	1.10745	-1.72737	-16.4441	8.91773e-53	1.21758e-51
DPM2	9.95068	0.607867	8.93467	0.431313	1.01601	16.438	9.62385e-53	1.31196e-51
MRGPRX3	1.49397	1.61808	4.35341	1.93373	-2.85944	-16.4371	9.72806e-53	1.32515e-51
HIST1H3D	4.86429	1.88795	1.71717	1.36066	3.14712	16.4172	1.24566e-52	1.69552e-51
AFAP1L1	7.62438	0.842868	9.11526	1.01598	-1.49089	-16.413	1.31323e-52	1.78611e-51
ATF3	8.7588	1.56273	11.4188	1.44119	-2.66002	-16.4044	1.46098e-52	1.98554e-51
GIMAP4	8.65144	0.838613	10.0616	0.676501	-1.4102	-16.3997	1.54865e-52	2.10146e-51
ALAS2	0.475329	0.743404	2.18402	2.01235	-1.70869	-16.383	1.90641e-52	2.58295e-51
ARHGAP24	7.32101	0.941459	8.86997	0.554302	-1.54896	-16.3788	2.0084e-52	2.71904e-51
CRB2	2.75769	1.37957	5.18133	1.62671	-2.42364	-16.3753	2.09608e-52	2.83557e-51
C20orf103	7.72008	1.81204	4.65631	1.60766	3.06377	16.3626	2.45479e-52	3.3183e-51
SSX2IP	9.31256	0.683152	8.09954	0.85565	1.21301	16.3536	2.74541e-52	3.7083e-51
P2RX6	1.84222	1.29121	4.10344	1.50553	-2.26122	-16.3524	2.78388e-52	3.75739e-51
ZNF366	4.34136	1.37723	6.62022	0.949929	-2.27886	-16.3397	3.26059e-52	4.39408e-51
DBNDD1	9.48315	1.08029	7.64905	1.00566	1.8341	16.3383	3.31561e-52	4.46482e-51
MRGPRF	6.20151	1.46026	8.59031	0.812293	-2.38881	-16.3379	3.33488e-52	4.48735e-51
MGAT3	5.85466	1.39247	8.15447	0.93625	-2.29981	-16.3355	3.43492e-52	4.61844e-51
SNTB2	9.36893	0.664715	10.4847	0.546215	-1.11581	-16.331	3.63104e-52	4.8747e-51
WSCD1	4.91934	1.32782	7.09349	0.768523	-2.17416	-16.3228	4.01952e-52	5.39215e-51
ATP1B2	5.04286	1.22017	7.0192	0.524678	-1.97634	-16.3127	4.55343e-52	6.10374e-51
METRN	8.89698	1.61238	6.25305	0.98313	2.64392	16.3088	4.78269e-52	6.40619e-51
CPEB1	3.10085	1.52859	5.58111	0.717346	-2.48026	-16.3057	4.96701e-52	6.64804e-51
NODAL	1.88456	0.906275	3.39595	0.710709	-1.51139	-16.3056	4.97231e-52	6.65009e-51
SCN2A	3.83725	2.00792	7.18867	1.61071	-3.35142	-16.3049	5.01896e-52	6.7074e-51
ARHGAP11A	8.37641	1.1202	6.54092	0.670843	1.83549	16.304	5.07374e-52	6.77547e-51
CYP11A1	3.26358	1.47167	5.65459	0.721708	-2.39102	-16.3035	5.10414e-52	6.81092e-51
MPDZ	9.38144	0.862404	10.7955	0.51947	-1.4141	-16.3019	5.20837e-52	6.94476e-51
HCRTR1	0.389557	0.561634	1.4111	0.801162	-1.02154	-16.3011	5.25738e-52	7.00481e-51
INPP1	7.46328	0.830315	8.804	0.313119	-1.34072	-16.297	5.53423e-52	7.36256e-51
OR2L13	0.862865	1.07793	2.8008	1.47278	-1.93794	-16.2965	5.56755e-52	7.40132e-51
DPYD	8.25716	1.12994	10.0763	0.389009	-1.81915	-16.2877	6.20986e-52	8.24898e-51
NMNAT2	4.928	1.8581	7.9805	1.20545	-3.0525	-16.2865	6.30257e-52	8.36583e-51
HSD17B11	8.31503	0.982891	9.94069	0.703509	-1.62565	-16.2843	6.47314e-52	8.58578e-51
NMRAL1	9.98255	0.68479	8.80252	0.730634	1.18003	16.284	6.49354e-52	8.60638e-51
ARHGAP31	9.06528	0.891423	10.541	0.648357	-1.47573	-16.2775	7.04241e-52	9.32684e-51
TBC1D4	9.59412	0.952577	11.1369	0.438336	-1.54281	-16.2737	7.37902e-52	9.76531e-51
NIPSNAP1	10.7326	0.563643	9.72007	0.766687	1.01253	16.2663	8.08759e-52	1.0695e-50
RASIP1	7.37502	1.07458	9.11772	0.528164	-1.7427	-16.2656	8.15303e-52	1.07729e-50
TDRD6	2.77256	1.25868	4.83159	0.767624	-2.05903	-16.2656	8.15868e-52	1.07729e-50
BOC	8.36021	1.46074	10.704	0.468231	-2.34383	-16.2566	9.12025e-52	1.20335e-50
TESC	4.3674	1.60356	7.01536	1.17139	-2.64796	-16.246	1.03984e-51	1.37098e-50
IL17B	2.05501	1.80044	5.1297	1.86183	-3.07469	-16.2349	1.19186e-51	1.57023e-50
ACSL4	9.06439	1.05181	10.7787	0.615902	-1.71427	-16.2329	1.2216e-51	1.60821e-50
ARHGAP10	7.56672	1.07679	9.31522	0.596221	-1.7485	-16.2138	1.54632e-51	2.03419e-50
CREB3L4	11.2056	1.03354	9.42113	1.16049	1.78443	16.2125	1.57128e-51	2.06548e-50
MANF	10.2813	0.609936	9.27481	0.442327	1.00652	16.2054	1.71608e-51	2.25414e-50
GPR124	9.64174	0.97491	11.2473	0.704574	-1.60557	-16.2038	1.75123e-51	2.29861e-50
PTCHD1	3.00766	2.37582	6.91965	1.73517	-3.912	-16.2034	1.76013e-51	2.30857e-50
PRDM16	3.82631	1.34403	6.01574	0.816079	-2.18943	-16.2023	1.78266e-51	2.33638e-50
MYO1H	1.82921	1.29546	4.015	1.23342	-2.18579	-16.2001	1.83167e-51	2.39884e-50
EMX2OS	4.69475	1.52088	7.2319	1.31411	-2.53716	-16.1844	2.22284e-51	2.90898e-50
OSR1	5.20508	2.32314	8.9281	0.914392	-3.72302	-16.1823	2.28307e-51	2.98558e-50
TUBB3	9.14463	1.62428	6.49106	1.08857	2.65356	16.1637	2.86905e-51	3.74079e-50
KLF14	1.21233	1.08057	3.07877	1.24232	-1.86644	-16.1612	2.95991e-51	3.8564e-50
SLC12A6	8.51229	0.741316	9.71415	0.428127	-1.20185	-16.1422	3.74076e-51	4.86658e-50
FAM195A	8.68299	1.0307	6.99831	0.706655	1.68468	16.1398	3.85551e-51	5.01217e-50
DUSP6	10.0556	1.11856	11.8517	0.516046	-1.79616	-16.1386	3.90901e-51	5.07798e-50
MRC1	6.36401	1.66605	9.16366	1.58689	-2.79965	-16.1374	3.97125e-51	5.15504e-50
SKAP2	8.83526	0.986458	10.4156	0.415776	-1.58032	-16.1363	4.02222e-51	5.21736e-50
CDH23	5.88248	1.49391	8.33186	1.08844	-2.44939	-16.1327	4.20622e-51	5.45203e-50
RNFT2	6.38033	1.12253	4.56761	0.618946	1.81272	16.1285	4.43047e-51	5.73428e-50
STIL	7.996	1.02653	6.31163	0.75408	1.68436	16.1273	4.49198e-51	5.80963e-50
VAMP8	11.273	0.617913	10.1852	0.795139	1.08779	16.1253	4.60764e-51	5.95485e-50
CCND2	8.99284	0.996271	10.5988	0.53268	-1.60594	-16.1158	5.17968e-51	6.68926e-50
DAB2IP	10.0115	0.739015	11.2164	0.491658	-1.20499	-16.1154	5.20058e-51	6.71133e-50
LIX1L	8.32139	0.840528	9.67823	0.467214	-1.35684	-16.1066	5.79977e-51	7.47912e-50
GAS2	3.16995	1.27921	5.2878	1.07758	-2.11786	-16.0975	6.48396e-51	8.34314e-50
SMAD9	3.77388	1.45344	6.11141	0.765393	-2.33753	-16.0976	6.47985e-51	8.34314e-50
GABRG1	0.534405	0.710545	1.88144	1.24893	-1.34704	-16.0961	6.60193e-51	8.48874e-50
PTCH1	6.59828	1.39387	8.81371	0.459271	-2.21543	-16.0958	6.62098e-51	8.50705e-50
FGL2	8.60952	1.23206	10.6092	0.789528	-1.99963	-16.095	6.68955e-51	8.5889e-50
SLC47A2	1.26748	1.05273	3.00144	0.835533	-1.73396	-16.0937	6.79585e-51	8.71904e-50
C2orf71	0.80193	1.20791	2.77835	0.886817	-1.97643	-16.0871	7.36953e-51	9.44134e-50
LPIN1	8.95396	0.908153	10.4484	0.718293	-1.49447	-16.0786	8.1785e-51	1.04701e-49
LOC339290	8.64489	0.775194	9.89951	0.471164	-1.25462	-16.0779	8.25314e-51	1.0558e-49
KCNA1	2.36773	1.7518	5.24056	1.34906	-2.87282	-16.0718	8.89578e-51	1.13719e-49
LRIG3	8.02352	1.32496	10.1209	0.368357	-2.09738	-16.0651	9.66081e-51	1.2341e-49
NPAS4	0.974689	0.997027	2.67712	1.10568	-1.70243	-16.063	9.90952e-51	1.26495e-49
ARHGAP26	8.16317	1.10145	9.91872	0.461314	-1.75555	-16.06	1.02804e-50	1.31135e-49
PPP1R14A	4.37458	1.6859	7.07497	0.851435	-2.70038	-16.0589	1.0426e-50	1.32896e-49
B4GALNT4	8.87251	1.31614	6.36355	2.38064	2.50896	16.0583	1.04988e-50	1.33727e-49
ITGB1BP1	9.60564	0.488725	10.6093	1.07859	-1.00369	-16.0551	1.09191e-50	1.3898e-49
NRIP2	5.85291	0.930366	7.35257	0.543311	-1.49966	-16.0523	1.13096e-50	1.43847e-49
PTPN14	7.30705	1.17082	9.21398	0.831318	-1.90693	-16.0496	1.16873e-50	1.48437e-49
STXBP6	2.86453	1.67808	5.55946	0.926208	-2.69493	-16.0463	1.21684e-50	1.54437e-49
ATP6V0C	11.6369	0.636455	10.607	0.394412	1.02986	16.0452	1.2333e-50	1.56413e-49
FMNL2	8.77971	1.06727	10.4907	0.559596	-1.71104	-16.0425	1.27521e-50	1.61612e-49
CNTFR	4.63916	2.59008	8.78805	1.40865	-4.14888	-16.0183	1.71603e-50	2.17167e-49
SLC24A2	3.4908	1.95208	0.403226	0.668068	3.08758	16.0123	1.84647e-50	2.33508e-49
RND3	9.31766	1.24168	11.293	0.548069	-1.97536	-16.0115	1.86521e-50	2.35709e-49
KCNA6	3.65925	1.61835	6.26981	1.02601	-2.61056	-16.0108	1.88011e-50	2.37421e-49
PPP4R1L	4.78795	1.2249	6.7402	0.584973	-1.95225	-16.0036	2.05374e-50	2.59162e-49
43718	10.035	0.732576	11.2028	0.342145	-1.16781	-15.9974	2.21692e-50	2.79553e-49
FOXO4	8.78124	0.706911	9.91607	0.404697	-1.13483	-15.9871	2.51498e-50	3.1646e-49
LPCAT2	8.4055	1.04475	10.0787	0.584532	-1.6732	-15.9834	2.63357e-50	3.31147e-49
SPATA17	5.96212	1.19819	3.98241	1.06493	1.97971	15.9806	2.72416e-50	3.42294e-49
EFEMP1	10.2361	1.65507	12.8655	0.766048	-2.62947	-15.9732	2.98158e-50	3.74373e-49
MID1	7.04193	1.59931	9.56672	0.57645	-2.52479	-15.9653	3.28598e-50	4.123e-49
PPP1R15A	9.8716	0.799691	11.214	0.818982	-1.34242	-15.9597	3.5201e-50	4.41363e-49
ZCCHC24	9.4156	1.00009	11.0517	0.809173	-1.63614	-15.9577	3.60422e-50	4.51589e-49
SACS	8.22057	1.07002	9.93613	0.641174	-1.71556	-15.9517	3.88214e-50	4.86065e-49
NUDT7	5.59493	1.02668	7.22368	0.464541	-1.62875	-15.9506	3.93552e-50	4.924e-49
RP1L1	1.93979	1.05682	3.66262	0.824916	-1.72282	-15.9501	3.95611e-50	4.94625e-49
RAPGEF3	7.90576	1.23671	9.88096	0.689434	-1.9752	-15.9465	4.13659e-50	5.16825e-49
DIAPH3	7.01478	1.29168	4.91731	0.965827	2.09746	15.9453	4.19903e-50	5.24255e-49
COX7A1	6.50938	1.3848	8.78631	1.20341	-2.27693	-15.9414	4.40267e-50	5.49291e-49
ZNF677	4.43296	1.3586	6.57188	0.451394	-2.13892	-15.9409	4.43173e-50	5.52527e-49
RPS6KA3	9.16688	1.03095	10.8033	0.486237	-1.63641	-15.9398	4.49156e-50	5.59591e-49
EVPL	9.8775	1.10817	7.82783	1.86174	2.04967	15.9301	5.05335e-50	6.28695e-49
NANS	10.5037	0.724823	9.34312	0.428882	1.16058	15.9231	5.50456e-50	6.84349e-49
BACH2	6.01863	1.34022	8.15396	0.740616	-2.13533	-15.9153	6.05698e-50	7.51969e-49
DLK2	3.00731	1.77268	5.99917	1.94582	-2.99187	-15.9117	6.33101e-50	7.85436e-49
C1orf31	8.62651	0.709345	7.50133	0.338175	1.12518	15.906	6.78606e-50	8.413e-49
GPR34	6.80017	1.17586	8.74184	1.08933	-1.94167	-15.9013	7.1934e-50	8.91174e-49
LIG1	9.64425	0.638718	8.48924	0.989085	1.15501	15.901	7.21464e-50	8.93178e-49
ALDH2	10.5928	1.24605	12.7053	1.41265	-2.11248	-15.9005	7.26427e-50	8.98693e-49
NCOA7	9.22	1.1481	11.0474	0.643031	-1.8274	-15.8869	8.57182e-50	1.05971e-48
ORC6L	6.58959	1.34286	4.42816	0.938645	2.16143	15.8802	9.30427e-50	1.14946e-48
REV3L	9.02324	0.862522	10.4071	0.566354	-1.38387	-15.8778	9.57967e-50	1.18265e-48
PLD1	7.73047	1.11139	9.47591	0.399992	-1.74544	-15.8759	9.80692e-50	1.20986e-48
KCNIP1	1.75593	1.23256	3.79075	1.15849	-2.03482	-15.8731	1.01517e-49	1.25152e-48
GAB3	5.83451	0.868729	7.2544	0.735769	-1.41988	-15.8726	1.02106e-49	1.25791e-48
FAM102A	11.8879	0.67416	10.7284	0.835126	1.15957	15.8724	1.02298e-49	1.25939e-48
FLRT2	7.43039	1.52794	9.8366	0.646055	-2.4062	-15.8711	1.0395e-49	1.27795e-48
MAFF	8.35205	0.983103	9.97407	0.917416	-1.62202	-15.8704	1.04833e-49	1.28791e-48
C9orf5	10.629	0.638693	11.6586	0.448457	-1.02957	-15.8685	1.0727e-49	1.31693e-48
KIAA1614	4.87052	1.045	6.54181	0.660766	-1.67129	-15.8675	1.08647e-49	1.3329e-48
TIGD3	4.18181	1.07495	2.44833	0.786006	1.73348	15.8565	1.24292e-49	1.52378e-48
PLP1	3.77408	2.34981	7.46134	0.895476	-3.68726	-15.8557	1.25396e-49	1.53626e-48
LMNB2	10.3304	0.747992	9.10483	0.654495	1.22555	15.8548	1.26811e-49	1.55251e-48
DARC	6.67608	2.7597	10.9984	0.95896	-4.32234	-15.8542	1.2785e-49	1.56414e-48
GFER	9.07413	0.690219	7.96678	0.458327	1.10735	15.854	1.28115e-49	1.5663e-48
SLC12A8	8.61103	0.912436	7.01256	1.25599	1.59847	15.8501	1.34341e-49	1.64014e-48
YIF1B	9.4107	0.702223	8.28818	0.44193	1.12252	15.8454	1.42346e-49	1.73548e-48
HSD17B7	8.53963	0.741956	7.33221	0.607629	1.20742	15.8438	1.45077e-49	1.76756e-48
PER2	9.46645	0.725084	10.6911	0.814831	-1.22464	-15.8436	1.45512e-49	1.77164e-48
ACTG2	7.95401	2.31746	11.6851	1.69947	-3.73107	-15.8383	1.55056e-49	1.88653e-48
MTHFD2	10.7212	0.761434	9.50177	0.502073	1.21939	15.8379	1.55854e-49	1.89493e-48
NCALD	8.59376	1.40933	10.8334	0.821974	-2.23965	-15.8375	1.56696e-49	1.90386e-48
MFAP4	8.97451	2.04519	12.2201	1.17032	-3.24557	-15.8334	1.64794e-49	1.9995e-48
CCL21	5.34363	2.78698	9.75018	1.51683	-4.40655	-15.811	2.16449e-49	2.62265e-48
CAPN3	5.37795	1.2436	7.384	0.95618	-2.00605	-15.8056	2.31044e-49	2.79756e-48
PRDM5	4.64602	1.1785	6.49469	0.497217	-1.84867	-15.8052	2.322e-49	2.80964e-48
FAM72A	4.55775	1.42411	2.29319	0.877572	2.26455	15.805	2.3291e-49	2.8163e-48
LMX1A	1.53097	1.30801	3.78296	1.68186	-2.25199	-15.8014	2.43216e-49	2.93689e-48
SNRPE	10.238	0.635227	9.22785	0.377117	1.01011	15.8014	2.43146e-49	2.93689e-48
A2M	13.3236	1.02009	14.9191	0.381747	-1.59556	-15.7972	2.55887e-49	3.08778e-48
CRHR2	0.562127	0.683018	1.75802	0.94901	-1.1959	-15.7968	2.57179e-49	3.10125e-48
MT1X	8.5452	1.46164	10.8521	0.775016	-2.30689	-15.7933	2.68325e-49	3.23345e-48
GPR44	2.52104	1.26732	4.53765	0.810504	-2.0166	-15.7824	3.06684e-49	3.69318e-48
PSD2	2.60695	1.37381	4.89912	1.47234	-2.29217	-15.781	3.11964e-49	3.7542e-48
CHST7	5.49383	0.788278	6.7702	0.640076	-1.27637	-15.7794	3.18144e-49	3.82336e-48
RETSAT	11.0348	0.626705	12.2426	1.22924	-1.20776	-15.7754	3.33828e-49	4.00911e-48
BAX	9.25197	0.68762	8.13216	0.595137	1.11981	15.7704	3.54957e-49	4.25996e-48
AQP4	2.54336	1.65219	5.26726	1.62781	-2.7239	-15.7691	3.60496e-49	4.32351e-48
PTGS2	4.81112	2.08005	8.16006	1.63219	-3.34895	-15.7568	4.18557e-49	5.01643e-48
HCG11	8.06345	1.05913	9.71605	0.401299	-1.6526	-15.7562	4.21809e-49	5.04898e-48
KLHL30	2.70379	1.40529	5.10435	1.76011	-2.40057	-15.7562	4.21845e-49	5.04898e-48
MDFIC	9.25153	0.86509	10.673	0.831413	-1.4215	-15.7485	4.63321e-49	5.53789e-48
GRM4	5.59355	2.58113	1.55883	1.12326	4.03473	15.7469	4.71995e-49	5.63776e-48
PCDHGA3	3.59979	1.37718	5.77808	0.821031	-2.1783	-15.7465	4.7456e-49	5.66456e-48
ZFP36L2	11.6437	0.987048	13.1911	0.486838	-1.54741	-15.7192	6.6106e-49	7.88537e-48
HSPE1	10.8203	0.664414	9.77735	0.332011	1.043	15.7124	7.1775e-49	8.55582e-48
RHOU	8.42215	1.35246	10.5327	0.602451	-2.11051	-15.7035	7.99917e-49	9.516e-48
CYB561	11.923	0.751561	10.6939	0.708761	1.22915	15.7019	8.16018e-49	9.701e-48
C21orf58	6.87556	0.983477	5.30597	0.713474	1.56959	15.6988	8.47497e-49	1.00684e-47
TOR2A	8.35319	0.705204	7.23681	0.442497	1.11638	15.6948	8.8917e-49	1.05564e-47
RTKN2	7.12214	1.08086	5.3615	0.996672	1.76065	15.6919	9.2059e-49	1.09221e-47
TMEM141	10.1606	0.784057	8.90841	0.574106	1.25217	15.6896	9.47007e-49	1.1228e-47
PACRG	2.30112	1.40202	4.55495	1.13699	-2.25383	-15.6851	1.00058e-48	1.18552e-47
RASSF7	9.00759	1.08285	7.1612	1.37671	1.84639	15.6791	1.07651e-48	1.27378e-47
C1orf190	4.01817	1.10985	5.75051	0.525626	-1.73235	-15.6748	1.13397e-48	1.34086e-47
RELT	7.21193	0.841934	5.83445	0.812517	1.37748	15.6718	1.17536e-48	1.38888e-47
F3	8.19393	1.54051	10.5987	0.752405	-2.40475	-15.6671	1.24451e-48	1.4696e-47
FOXN2	7.90844	0.796322	9.21345	0.780427	-1.30501	-15.6665	1.25326e-48	1.47894e-47
CANT1	11.6533	0.747689	10.4688	0.500247	1.18447	15.6526	1.48373e-48	1.74976e-47
FAT2	5.90508	2.5598	9.91638	1.44919	-4.0113	-15.6438	1.65119e-48	1.94594e-47
CHTF18	8.3128	1.09988	6.51802	1.06015	1.79478	15.6418	1.69075e-48	1.99123e-47
ALDH3A1	2.20194	2.00615	5.39551	1.49694	-3.19357	-15.6397	1.73457e-48	2.04148e-47
C1orf135	5.90539	1.10733	4.1779	0.556897	1.7275	15.6355	1.82615e-48	2.14782e-47
RNPC3	7.21896	0.633883	8.24575	0.565335	-1.02679	-15.634	1.85927e-48	2.18532e-47
PIK3C2G	3.9834	2.53798	8.14643	2.57758	-4.16303	-15.6328	1.88622e-48	2.21552e-47
PRSS12	3.58922	2.09344	6.81529	0.64012	-3.22607	-15.6274	2.01361e-48	2.36358e-47
MFNG	7.0414	0.910806	8.5028	0.748682	-1.4614	-15.626	2.04896e-48	2.40348e-47
YAP1	10.9745	0.873454	12.3302	0.377909	-1.35576	-15.6193	2.22118e-48	2.60377e-47
BCL9	10.3404	0.708984	9.22982	0.395315	1.11054	15.6173	2.27602e-48	2.66628e-47
LOC100190939	6.7057	0.841686	8.04362	0.618191	-1.33791	-15.6162	2.30584e-48	2.69942e-47
ANGPTL2	10.1532	1.19628	12.0686	0.976214	-1.91546	-15.6114	2.44365e-48	2.85886e-47
SYNGR2	12.3305	0.700225	11.2319	0.412222	1.09854	15.603	2.70517e-48	3.16272e-47
BNC1	2.51136	1.84736	5.4442	1.37571	-2.93283	-15.5989	2.84128e-48	3.31966e-47
NEXN	7.46377	1.18811	9.33479	0.777936	-1.87102	-15.597	2.90818e-48	3.39557e-47
KLHL4	3.43215	1.25156	5.50752	1.39455	-2.07537	-15.5937	3.02896e-48	3.53426e-47
GPR12	1.75888	2.20323	5.18493	1.1173	-3.42605	-15.5905	3.14564e-48	3.66797e-47
LOC100128164	1.22645	0.822131	2.67081	1.23141	-1.44436	-15.5892	3.19589e-48	3.72411e-47
RAB25	11.1183	1.00201	8.93282	2.70022	2.1855	15.5889	3.20687e-48	3.73443e-47
PRKD1	6.45428	1.21824	8.33506	0.470039	-1.88078	-15.5877	3.25668e-48	3.78995e-47
CPM	8.70588	1.08699	10.5915	1.54734	-1.88561	-15.5849	3.36677e-48	3.91548e-47
TOMM40	10.0464	0.698992	8.93255	0.541531	1.11389	15.5829	3.45161e-48	4.0115e-47
RNF180	6.33008	1.21824	8.20669	0.426823	-1.8766	-15.5815	3.50871e-48	4.07518e-47
TEAD1	10.284	0.822087	11.611	0.740598	-1.32699	-15.5787	3.62985e-48	4.2131e-47
CCL13	2.8678	1.81235	5.88054	2.07609	-3.01274	-15.5706	4.00301e-48	4.64318e-47
GRAMD3	8.75842	0.896177	10.2671	1.10228	-1.50867	-15.5681	4.12791e-48	4.78491e-47
EDA	5.61343	1.05969	7.25608	0.500764	-1.64265	-15.5666	4.20261e-48	4.8683e-47
TTLL10	1.57954	1.09307	3.33187	0.93209	-1.75234	-15.5663	4.21837e-48	4.88335e-47
SHROOM4	7.73886	0.966088	9.25369	0.605674	-1.51484	-15.5615	4.46867e-48	5.16633e-47
C19orf21	9.02595	2.20878	5.45271	2.08025	3.57324	15.5578	4.67205e-48	5.3944e-47
C1orf183	5.15015	1.02381	6.75721	0.661764	-1.60706	-15.554	4.88929e-48	5.63703e-47
ITIH2	1.50869	1.87111	4.78111	2.78793	-3.27242	-15.554	4.89177e-48	5.63703e-47
PELI1	8.90349	0.975287	10.4239	0.554159	-1.52038	-15.5454	5.42907e-48	6.24804e-47
OGN	7.31262	2.50189	11.1707	1.08661	-3.85807	-15.535	6.15086e-48	7.06949e-47
PRKCA	6.79367	1.2887	8.77961	0.539882	-1.98594	-15.5316	6.41001e-48	7.36255e-47
DSG1	2.52512	2.63942	6.71688	2.09334	-4.19175	-15.5303	6.50955e-48	7.47202e-47
FLVCR1	7.84096	0.844716	6.49126	0.7092	1.34971	15.5283	6.67116e-48	7.65254e-47
DTYMK	8.89687	0.671853	7.84084	0.449532	1.05603	15.5236	7.05669e-48	8.08953e-47
KLHL3	6.59017	0.953705	8.08589	0.627316	-1.49572	-15.5227	7.13811e-48	8.17756e-47
MAF	9.04825	0.865267	10.4185	0.657552	-1.37025	-15.5199	7.38108e-48	8.44495e-47
GPRC5B	8.84742	1.18881	10.6653	0.327552	-1.81792	-15.5185	7.51236e-48	8.58959e-47
UNC13C	0.951506	1.10275	2.75129	1.13567	-1.79978	-15.5165	7.69442e-48	8.79205e-47
LCA5	7.14874	0.97394	8.66131	0.535664	-1.51257	-15.5084	8.48378e-48	9.68384e-47
REEP4	8.90641	0.797443	7.66702	0.440688	1.23938	15.5084	8.48584e-48	9.68384e-47
ALDH1A3	8.29145	1.66713	10.8854	1.00183	-2.59394	-15.4865	1.10396e-47	1.25818e-46
SMC4	10.7485	0.794022	9.5185	0.418489	1.23	15.4862	1.10791e-47	1.26188e-46
PIGQ	10.3684	0.794054	9.13054	0.489902	1.23783	15.4754	1.26189e-47	1.43448e-46
TIPARP	9.44853	0.853034	10.8257	0.821928	-1.37722	-15.4683	1.37496e-47	1.562e-46
IGFBP1	0.903585	1.3307	3.29568	2.24457	-2.39209	-15.4676	1.38734e-47	1.57506e-46
FLJ13197	3.90662	1.25027	5.84626	0.726533	-1.93964	-15.4614	1.49463e-47	1.69577e-46
GBE1	9.02458	0.691751	10.244	1.08533	-1.21943	-15.4533	1.64816e-47	1.86876e-46
PPYR1	1.07912	1.20074	2.9929	1.04161	-1.91378	-15.4529	1.6559e-47	1.87633e-46
STARD8	7.23287	0.855541	8.57833	0.632163	-1.34546	-15.444	1.84314e-47	2.08448e-46
AKAP7	6.70839	0.785322	7.9228	0.426024	-1.21441	-15.4413	1.90254e-47	2.15028e-46
NDOR1	9.42088	0.653659	8.37226	0.602505	1.04862	15.4322	2.12448e-47	2.39806e-46
FLJ35024	2.44436	1.32247	4.60529	1.4352	-2.16093	-15.4268	2.26646e-47	2.55505e-46
ERVFRDE1	1.48713	1.07523	3.26482	1.25876	-1.77769	-15.424	2.34313e-47	2.63812e-46
ST6GALNAC6	9.8804	0.612731	10.9147	0.801057	-1.03427	-15.4137	2.65181e-47	2.98375e-46
FANCD2	8.58727	0.811539	7.24203	0.967323	1.34524	15.409	2.80709e-47	3.15646e-46
EMILIN2	7.67799	1.05394	9.38069	1.06356	-1.7027	-15.3986	3.18175e-47	3.57547e-46
FRMD3	4.50428	1.66346	7.06004	0.849064	-2.55576	-15.3978	3.20958e-47	3.60445e-46
TJP3	9.77296	1.257	7.39371	2.51996	2.37925	15.3938	3.36864e-47	3.78067e-46
L3MBTL4	4.99225	1.64176	7.49588	0.653444	-2.50362	-15.3917	3.45443e-47	3.87449e-46
KIAA1211	7.02507	1.587	4.5055	1.385	2.51957	15.3882	3.60262e-47	4.03558e-46
CFI	7.69423	1.23987	9.58903	0.547614	-1.8948	-15.3806	3.94597e-47	4.41738e-46
THRB	8.71914	1.2159	10.5681	0.431766	-1.84893	-15.3777	4.09016e-47	4.5759e-46
SEMA3A	4.76846	1.43028	7.0079	1.07273	-2.23943	-15.3731	4.32205e-47	4.8292e-46
KIF4B	2.80393	1.00635	1.24378	0.64192	1.56015	15.3727	4.33826e-47	4.84425e-46
STARD10	11.778	1.31937	9.69096	1.11916	2.08704	15.3712	4.41862e-47	4.93087e-46
PCDHGB7	6.35423	1.63492	8.82807	0.423711	-2.47384	-15.3705	4.45945e-47	4.97329e-46
BOLA2	10.0318	0.74077	8.89122	0.403226	1.14062	15.37	4.48411e-47	4.99763e-46
TBCB	10.2564	0.647669	9.24907	0.428695	1.00737	15.3685	4.56687e-47	5.08346e-46
ECHDC1	9.17607	0.961263	10.657	0.543478	-1.48091	-15.3655	4.732e-47	5.26394e-46
ADAM8	8.12637	1.323	6.05679	0.986541	2.06958	15.3643	4.80001e-47	5.33623e-46
PKP3	10.287	0.908197	8.5915	1.76155	1.69548	15.3567	5.26174e-47	5.84586e-46
TYRO3	7.4522	0.945255	9.11377	1.50822	-1.66156	-15.3533	5.47638e-47	6.08051e-46
ACSBG1	2.36988	1.03188	3.95241	0.534214	-1.58254	-15.3528	5.51312e-47	6.11745e-46
CSRP1	12.4609	0.738163	13.6864	0.907428	-1.22544	-15.3456	6.00596e-47	6.65594e-46
SAC3D1	7.8503	0.90153	6.43552	0.710992	1.41478	15.3365	6.70023e-47	7.41604e-46
LRRC45	8.74492	0.953891	7.22563	0.881838	1.51929	15.3353	6.79841e-47	7.52e-46
OLR1	8.01264	1.3209	5.80247	1.71456	2.21017	15.3289	7.34109e-47	8.11011e-46
SIPA1L3	10.8078	0.673606	9.68556	0.849017	1.12223	15.3256	7.63694e-47	8.43167e-46
C6orf125	9.9028	0.714311	8.79909	0.446869	1.10372	15.3222	7.95621e-47	8.77869e-46
LRRC8E	8.97267	0.657728	7.69264	1.43091	1.28003	15.3216	8.0099e-47	8.8324e-46
TCTEX1D2	7.36652	0.744713	6.20213	0.563492	1.16439	15.321	8.07321e-47	8.89665e-46
C6orf1	8.89267	0.758244	7.72353	0.459984	1.16915	15.3177	8.39089e-47	9.24097e-46
HABP4	7.67993	0.760281	8.87783	0.633732	-1.19789	-15.3172	8.44317e-47	9.29275e-46
PDIA4	12.2252	0.659251	11.1944	0.501837	1.03085	15.3074	9.49319e-47	1.04354e-45
DES	3.81521	2.39591	7.66242	2.4462	-3.84721	-15.2928	1.13155e-46	1.24308e-45
CST2	4.31209	2.27281	0.852636	1.09147	3.45945	15.2888	1.18651e-46	1.30265e-45
KPNA5	5.74798	0.920306	7.18153	0.695729	-1.43355	-15.2743	1.41135e-46	1.5447e-45
PTH1R	4.35629	1.62365	6.89375	1.29458	-2.53746	-15.2723	1.44506e-46	1.58061e-45
MATN3	8.54876	1.67013	5.99759	0.914211	2.55117	15.2678	1.52469e-46	1.66668e-45
TMEM47	8.71229	1.36419	10.7748	0.536872	-2.06248	-15.2606	1.66266e-46	1.81637e-45
VGLL3	7.57028	1.43475	9.79776	1.06711	-2.22749	-15.2528	1.82391e-46	1.9913e-45
NEUROG2	1.15872	1.75232	3.9727	1.8269	-2.81397	-15.2494	1.89998e-46	2.07179e-45
BBOX1	4.27664	2.733	8.51642	2.03495	-4.23978	-15.2453	1.9948e-46	2.17384e-45
FAM82A1	5.69823	0.852998	6.98523	0.30754	-1.287	-15.2423	2.0676e-46	2.25178e-45
PTX3	4.1246	2.16669	7.44383	1.31737	-3.31923	-15.2412	2.09623e-46	2.28155e-45
PTK6	8.24889	1.37094	5.9993	1.65111	2.24959	15.2404	2.11521e-46	2.3008e-45
CASC5	6.97722	1.6133	4.48665	1.12116	2.49057	15.2395	2.13891e-46	2.32514e-45
GOLGA6L5	4.08661	1.23353	5.96471	0.648271	-1.8781	-15.2376	2.18716e-46	2.37321e-45
RASGEF1C	1.37866	1.70408	4.07004	1.55981	-2.69137	-15.2343	2.27751e-46	2.46973e-45
MFSD4	5.54882	1.42886	7.7076	0.611633	-2.15877	-15.2208	2.6757e-46	2.89796e-45
FRMD4A	9.30589	0.727131	10.4557	0.669393	-1.14979	-15.22	2.69988e-46	2.92114e-45
MRPS12	9.11481	0.733635	7.98281	0.503948	1.132	15.22	2.70041e-46	2.92114e-45
MTL5	9.09471	1.24188	7.06366	1.48246	2.03105	15.2112	2.99771e-46	3.24076e-45
ARHGEF10	8.96253	0.798383	10.1718	0.374368	-1.20925	-15.2026	3.32414e-46	3.59146e-45
MUSTN1	4.49548	1.40376	6.6995	1.24717	-2.20403	-15.1893	3.89226e-46	4.20269e-45
SEMA6D	6.70081	1.65427	9.19621	0.737828	-2.4954	-15.1823	4.2331e-46	4.56513e-45
AGPAT9	5.62227	1.32973	7.69906	1.13026	-2.07679	-15.1737	4.68926e-46	5.04782e-45
H3F3A	12.552	0.700333	11.472	0.498698	1.07995	15.1722	4.77227e-46	5.13404e-45
EDAR	1.46908	1.65503	4.1292	1.80115	-2.66013	-15.1714	4.82054e-46	5.18281e-45
NCRNA00087	4.24454	1.29793	6.20328	0.599961	-1.95874	-15.1697	4.92146e-46	5.2881e-45
SEPHS2	11.5111	0.710562	10.4367	0.337922	1.07442	15.1637	5.28092e-46	5.67089e-45
CCBE1	3.10849	1.54155	5.50057	1.2294	-2.39208	-15.1631	5.31859e-46	5.70787e-45
ACAA2	9.789	0.750275	10.9922	0.80169	-1.20322	-15.1569	5.7305e-46	6.14245e-45
RIMS3	6.46874	1.32242	8.50052	0.926505	-2.03178	-15.1558	5.80182e-46	6.21136e-45
TUBG1	10.0312	0.66009	9.02224	0.41164	1.00896	15.1545	5.89539e-46	6.30771e-45
TSKS	0.915243	0.90167	2.42168	1.22638	-1.50644	-15.1537	5.94852e-46	6.3607e-45
TRAIP	6.76159	0.760629	5.56642	0.690541	1.19518	15.149	6.29688e-46	6.72848e-45
RAB40C	9.61615	0.680898	8.56718	0.494133	1.04897	15.1362	7.33165e-46	7.816e-45
SPATA22	0.808145	1.08888	2.64637	1.56604	-1.83822	-15.1316	7.74078e-46	8.24221e-45
SLC5A4	1.62789	1.0016	3.22551	1.0473	-1.59763	-15.1314	7.76017e-46	8.25787e-45
S100P	8.046	2.96846	3.52784	1.85351	4.51816	15.1238	8.49908e-46	9.03872e-45
C14orf80	7.55777	1.0684	5.87149	1.03283	1.68628	15.1233	8.54539e-46	9.0825e-45
ADAMTS9	7.78183	1.18026	9.57108	0.677674	-1.78924	-15.1155	9.37498e-46	9.95225e-45
SLC27A6	3.86062	2.39869	7.55291	1.81221	-3.69229	-15.1101	1.00051e-45	1.06148e-44
ARFGAP1	10.6967	0.700374	9.61235	0.555922	1.08431	15.1097	1.00526e-45	1.06588e-44
TKTL1	0.58561	0.855874	1.94632	0.88438	-1.36071	-15.1004	1.12205e-45	1.18828e-44
NCAM1	5.33304	1.89409	8.17863	0.888943	-2.8456	-15.0998	1.12983e-45	1.19549e-44
ORC1L	6.38695	1.29858	4.36234	1.14071	2.02461	15.0989	1.1424e-45	1.20766e-44
ZNF727	2.6396	1.67628	5.17352	0.936974	-2.53393	-15.0958	1.18544e-45	1.25241e-44
PTCH2	4.36429	1.40484	6.49078	0.813362	-2.12649	-15.0903	1.26468e-45	1.33453e-44
RCSD1	7.68618	0.980701	9.16583	0.52578	-1.47965	-15.082	1.39577e-45	1.47022e-44
ARRDC4	8.73918	0.892211	10.0906	0.52347	-1.35139	-15.0788	1.45026e-45	1.52671e-44
TP53AIP1	2.84913	1.5138	5.35074	2.01171	-2.50161	-15.0709	1.59351e-45	1.6765e-44
TMOD2	7.99077	1.06262	9.58277	0.474914	-1.59199	-15.0696	1.6183e-45	1.70157e-44
UBE2Q2P1	3.40639	1.15867	5.18121	0.842539	-1.77481	-15.0693	1.6227e-45	1.70519e-44
APBA1	6.72836	1.20422	8.52449	0.479806	-1.79613	-15.0487	2.07358e-45	2.17769e-44
C1orf112	8.05324	0.711597	6.97499	0.43214	1.07825	15.0484	2.08025e-45	2.18339e-44
PLEK2	7.17004	0.924177	5.51842	1.67497	1.65162	15.0382	2.34802e-45	2.46006e-44
APOBEC3C	6.98667	1.04357	8.55169	0.515917	-1.56502	-15.0376	2.36517e-45	2.47655e-44
PCCA	8.22173	0.805518	9.44218	0.500344	-1.22046	-15.0366	2.39448e-45	2.50576e-44
TMEM79	8.86543	0.861106	7.52886	0.75024	1.33657	15.0325	2.51093e-45	2.62607e-44
ARHGEF6	9.72456	1.18576	11.515	0.708881	-1.79047	-15.0274	2.6682e-45	2.78889e-44
PTGIS	8.15777	1.58799	10.6003	1.27192	-2.44254	-15.0252	2.7381e-45	2.86026e-44
N4BP3	9.32802	1.12532	7.59981	0.883841	1.72821	15.0202	2.90697e-45	3.03308e-44
SPINT1	12.0082	0.664016	10.5027	2.0554	1.50546	15.0197	2.9237e-45	3.04873e-44
PLCL2	6.86768	1.05479	8.47975	0.777186	-1.61207	-15.019	2.94725e-45	3.07148e-44
PRELP	9.29962	1.69896	11.8855	1.18902	-2.58589	-15.0187	2.9575e-45	3.08033e-44
CAPN6	4.49706	2.80055	8.66367	1.12843	-4.16662	-15.0162	3.0459e-45	3.16867e-44
GLDN	5.07142	1.72046	7.72041	1.40989	-2.649	-15.0119	3.20567e-45	3.33291e-44
PTN	7.45091	1.98179	10.6225	2.25743	-3.17159	-15.0041	3.51658e-45	3.65401e-44
ADAMTSL2	7.29801	1.15823	5.51613	0.944908	1.78188	14.9994	3.71858e-45	3.86163e-44
LOC100128191	6.02002	0.8189	4.77691	0.551705	1.2431	14.9973	3.81372e-45	3.95811e-44
TSHR	2.01588	1.17415	3.87732	1.25546	-1.86143	-14.9968	3.83711e-45	3.98004e-44
FAM43A	7.1192	0.866206	8.44294	0.648456	-1.32374	-14.9938	3.97231e-45	4.11786e-44
KCNT2	2.95157	1.23191	4.83014	0.920257	-1.87857	-14.9742	5.00955e-45	5.18701e-44
CYP26B1	5.98246	1.46352	8.2859	1.50468	-2.30344	-14.9717	5.15846e-45	5.33807e-44
SRMS	5.01878	1.61187	2.51403	1.4923	2.50475	14.97	5.2677e-45	5.44792e-44
DNA2	7.08619	0.956974	5.62755	0.711721	1.45865	14.9656	5.54431e-45	5.73063e-44
KLC2	9.57042	0.700422	8.49901	0.539534	1.07141	14.9649	5.59514e-45	5.77979e-44
EPHA2	7.94432	0.963556	9.39564	0.592976	-1.45132	-14.9626	5.74732e-45	5.93352e-44
C14orf128	5.36006	0.905951	6.71834	0.505391	-1.35829	-14.9602	5.91315e-45	6.10115e-44
43528	2.93121	1.65447	0.475423	0.708379	2.45579	14.9557	6.23482e-45	6.42929e-44
GPRC5A	11.4347	1.58817	9.03546	1.05389	2.39922	14.9553	6.2657e-45	6.45736e-44
ZDHHC12	9.33721	0.724151	8.24198	0.477435	1.09524	14.955	6.2864e-45	6.47491e-44
NRXN1	2.91406	2.20884	6.23162	1.32857	-3.31756	-14.951	6.59282e-45	6.78657e-44
CR1	3.69031	1.67188	6.28333	1.54049	-2.59302	-14.9494	6.71718e-45	6.91055e-44
BCL6	9.98315	0.882405	11.3035	0.482076	-1.32034	-14.9423	7.30871e-45	7.51473e-44
COL1A1	16.5437	1.58876	14.0619	1.57532	2.48189	14.9296	8.48488e-45	8.71898e-44
PTPRZ1	3.45532	2.81773	7.71536	1.9594	-4.26004	-14.9279	8.65626e-45	8.88991e-44
EPDR1	7.421	1.25463	9.33446	0.978598	-1.91346	-14.9269	8.75943e-45	8.99063e-44
SELP	5.52171	2.28838	8.89995	0.875141	-3.37824	-14.9157	1.00058e-44	1.0258e-43
EPCAM	12.0735	0.939009	10.1505	2.43768	1.92298	14.9112	1.05441e-44	1.07973e-43
PRSS8	11.9726	1.13884	9.69502	2.81518	2.27759	14.9101	1.06906e-44	1.09346e-43
STRA13	9.27746	0.882192	7.94355	0.616079	1.33391	14.9076	1.10005e-44	1.12451e-43
PDLIM3	8.85368	1.34575	10.9306	1.21531	-2.07695	-14.905	1.13545e-44	1.16003e-43
PFKFB3	10.9108	1.13121	12.695	1.21787	-1.78414	-14.9044	1.14234e-44	1.16639e-43
ARTN	5.5188	1.78485	2.8478	1.06649	2.671	14.8997	1.20806e-44	1.23207e-43
CDH4	1.38907	1.3353	3.49221	1.42936	-2.10314	-14.8993	1.21442e-44	1.23784e-43
PRRT3	8.2081	1.23742	6.3534	0.759978	1.8547	14.8976	1.23866e-44	1.26182e-43
CDCA4	8.60854	0.720044	7.51303	0.5507	1.09551	14.8943	1.28674e-44	1.31004e-43
IER5L	8.45865	1.19473	6.63469	0.974572	1.82396	14.8855	1.42904e-44	1.4524e-43
MPZ	3.57297	1.41515	5.76497	1.34518	-2.19201	-14.8764	1.59015e-44	1.61522e-43
SLC14A2	2.18822	1.69694	4.9076	2.06362	-2.71938	-14.8614	1.8967e-44	1.92439e-43
CLEC14A	8.3737	0.933993	9.79022	0.714032	-1.41652	-14.8594	1.94147e-44	1.96755e-43
ANKAR	4.5291	0.818646	5.75885	0.542752	-1.22975	-14.855	2.04603e-44	2.06994e-43
TRPC1	6.166	1.10117	7.79295	0.50115	-1.62695	-14.8547	2.05313e-44	2.07594e-43
ASTN1	3.10135	1.96676	6.06379	1.40377	-2.96244	-14.8448	2.30789e-44	2.3322e-43
CAMK2N2	4.56484	1.52778	2.29267	0.87158	2.27217	14.8378	2.50615e-44	2.53109e-43
HIST1H3H	4.28681	1.95861	1.39316	0.942663	2.89365	14.8377	2.50932e-44	2.53285e-43
THOC6	9.10972	0.724406	8.00787	0.586469	1.10184	14.8221	3.01355e-44	3.03833e-43
EPS8	9.85733	0.875301	11.1614	0.52073	-1.30411	-14.8219	3.02009e-44	3.04318e-43
PDP2	6.78106	0.872169	8.14529	0.917906	-1.36423	-14.8208	3.05837e-44	3.08e-43
TMEM54	9.93565	0.792857	8.73377	0.619165	1.20188	14.8208	3.06123e-44	3.08112e-43
MBNL2	10.2252	0.950154	11.6241	0.409044	-1.39889	-14.8203	3.07732e-44	3.09555e-43
FIGN	4.30529	1.6854	6.79925	0.87687	-2.49395	-14.8197	3.09759e-44	3.11418e-43
AIM1L	3.91716	1.80492	1.2569	0.848798	2.66026	14.8124	3.37648e-44	3.39262e-43
SDF2L1	8.44495	0.955335	6.978	0.873166	1.46696	14.8029	3.77675e-44	3.79265e-43
TWIST2	4.10447	1.53306	6.44058	1.30696	-2.33611	-14.8026	3.79109e-44	3.80489e-43
FAM23A	1.93738	1.01714	3.52018	1.04752	-1.5828	-14.7923	4.27628e-44	4.28696e-43
RBMS1	9.78732	0.876896	11.0808	0.430866	-1.29345	-14.7874	4.52797e-44	4.53671e-43
OCIAD2	9.58919	0.66245	8.55496	0.695595	1.03423	14.7837	4.72925e-44	4.73569e-43
ATP8B4	5.78003	1.08449	7.453	1.04741	-1.67297	-14.7833	4.75522e-44	4.75899e-43
LRCH2	4.76118	1.2607	6.62944	0.717766	-1.86826	-14.783	4.76951e-44	4.77059e-43
FANCA	7.47049	1.20803	5.6107	1.14859	1.85979	14.7827	4.7872e-44	4.78514e-43
PROL1	2.04394	2.73355	6.40721	3.35371	-4.36327	-14.7827	4.78947e-44	4.78514e-43
ARHGAP6	5.68902	1.17029	7.42118	0.64946	-1.73216	-14.7796	4.96279e-44	4.95549e-43
KCNMB2	1.36894	1.26102	3.30557	1.17653	-1.93663	-14.7788	5.01418e-44	5.00398e-43
LOC389705	2.20424	0.961831	3.65947	0.767159	-1.45523	-14.7744	5.27443e-44	5.26072e-43
SERPING1	12.0005	1.10096	13.6468	0.749569	-1.6463	-14.7737	5.31859e-44	5.30177e-43
FLYWCH2	9.17567	0.803326	7.97682	0.522632	1.19886	14.7733	5.34493e-44	5.32502e-43
C8orf79	5.61959	1.94463	8.47711	0.911141	-2.85751	-14.77	5.56024e-44	5.53641e-43
STAC	4.0623	1.8448	6.754	0.64442	-2.6917	-14.7655	5.86192e-44	5.83351e-43
MASP2	3.71578	1.17523	5.47363	0.821166	-1.75785	-14.7551	6.61984e-44	6.58403e-43
COPE	11.2238	0.70125	10.1702	0.513672	1.05359	14.7538	6.72388e-44	6.68375e-43
CDNF	4.5838	0.96644	6.01704	0.577593	-1.43324	-14.7537	6.72994e-44	6.686e-43
CCL28	6.14828	2.21605	9.52827	1.9851	-3.37999	-14.7475	7.23852e-44	7.18723e-43
TMEM170B	7.29246	0.952805	8.78668	1.0596	-1.49422	-14.7453	7.42365e-44	7.3669e-43
ACVR2A	8.15569	0.723978	9.21961	0.348814	-1.06392	-14.7324	8.63593e-44	8.56509e-43
CTNNAL1	8.56109	0.820051	9.77975	0.520661	-1.21867	-14.732	8.67457e-44	8.59859e-43
APBB1IP	7.65147	1.01469	9.23073	1.08128	-1.57926	-14.7265	9.25065e-44	9.15933e-43
CHST3	8.50502	1.29603	10.3928	0.469922	-1.88775	-14.7255	9.36395e-44	9.26632e-43
PLCG2	7.99163	1.01581	9.47416	0.404018	-1.48253	-14.7212	9.84753e-44	9.73395e-43
LPAR2	8.58963	0.719795	7.37509	1.15395	1.21454	14.7097	1.12658e-43	1.11171e-42
RNF145	9.3444	1.04302	10.857	0.306752	-1.5126	-14.7026	1.22426e-43	1.20676e-42
THRSP	5.96334	2.71725	9.99281	1.77329	-4.02947	-14.6988	1.28082e-43	1.26181e-42
RFTN2	5.64496	1.01589	7.18607	0.889303	-1.54112	-14.691	1.40292e-43	1.37979e-42
MEST	9.46379	1.30794	11.4154	0.945502	-1.95159	-14.6876	1.45968e-43	1.43481e-42
C6orf123	1.95759	1.18225	3.71453	0.802105	-1.75694	-14.6874	1.46229e-43	1.43657e-42
ADAMTS3	4.65357	1.40824	6.73542	0.875444	-2.08185	-14.6868	1.47332e-43	1.4466e-42
KCTD9	9.04455	0.706406	10.0768	0.314543	-1.03225	-14.6823	1.55302e-43	1.52402e-42
CHST9	3.96502	2.34872	7.57392	2.33776	-3.6089	-14.6809	1.57853e-43	1.54818e-42
VIM	14.0676	0.97097	15.5433	0.874515	-1.47568	-14.6743	1.70495e-43	1.67032e-42
ZNF296	6.52006	1.15423	4.68078	1.45953	1.83929	14.669	1.81424e-43	1.77444e-42
C7orf51	2.76905	1.44375	4.88068	0.727931	-2.11163	-14.6627	1.95295e-43	1.90904e-42
FAM13AOS	4.51483	1.00334	5.99865	0.642046	-1.48382	-14.6618	1.97235e-43	1.92695e-42
C11orf92	3.9799	1.97421	6.89545	1.25255	-2.91555	-14.6595	2.02694e-43	1.97919e-42
ABHD12	10.6894	0.713996	9.64389	0.360965	1.04549	14.655	2.13553e-43	2.08406e-42
ABHD6	6.88305	0.840093	8.15941	0.764319	-1.27636	-14.6489	2.29425e-43	2.23772e-42
ADPRH	7.78473	0.715262	8.8347	0.39314	-1.04997	-14.6452	2.39603e-43	2.33569e-42
SASH1	9.95647	1.19032	11.6837	0.467766	-1.72727	-14.6449	2.40383e-43	2.34201e-42
NAT8L	5.31191	1.82836	8.10344	1.7656	-2.79153	-14.6396	2.55819e-43	2.49102e-42
CLDN7	10.9471	0.982243	9.24809	1.75089	1.69903	14.6333	2.75177e-43	2.67804e-42
STOX2	3.82913	1.53846	6.07418	0.790862	-2.24505	-14.6202	3.20886e-43	3.11945e-42
FAM3D	2.51511	2.29577	6.05753	2.43595	-3.54243	-14.6195	3.23274e-43	3.14093e-42
EGR3	8.03653	1.84078	10.8034	1.55428	-2.7669	-14.6164	3.35191e-43	3.25493e-42
COL4A3	2.22169	1.60124	4.677	1.62175	-2.45531	-14.6157	3.38101e-43	3.28138e-42
PCYOX1	11.4333	0.655765	12.4419	0.670574	-1.00862	-14.6153	3.39715e-43	3.29523e-42
KATNAL1	8.34759	0.701136	9.40125	0.581563	-1.05366	-14.6115	3.54999e-43	3.4416e-42
PPARGC1A	4.2568	1.86339	6.96912	0.916197	-2.71233	-14.6079	3.70069e-43	3.58573e-42
NRSN2	10.0985	0.690137	9.08237	0.435569	1.01615	14.5917	4.47244e-43	4.33112e-42
SYNE2	11.2249	0.823601	12.4319	0.480312	-1.20701	-14.5905	4.53528e-43	4.38958e-42
LONRF3	3.62094	1.49714	5.80682	0.827248	-2.18589	-14.5863	4.764e-43	4.60589e-42
ACVRL1	8.59631	0.774693	9.77791	0.756425	-1.1816	-14.5862	4.76759e-43	4.60684e-42
C14orf64	2.77044	1.66041	5.17129	0.680461	-2.40086	-14.5846	4.86087e-43	4.69441e-42
SH3BP5	9.99492	0.818583	11.1941	0.477699	-1.19917	-14.584	4.8936e-43	4.72343e-42
NAALADL1	4.92148	1.07167	6.47486	0.478354	-1.55338	-14.5806	5.08949e-43	4.90983e-42
WDR86	4.22156	1.71821	6.76157	1.22078	-2.54001	-14.5725	5.59654e-43	5.39309e-42
LRRC34	5.07149	0.845259	6.32159	0.597743	-1.2501	-14.5678	5.90875e-43	5.68463e-42
ATXN1L	9.94047	0.687583	10.9424	0.359409	-1.00197	-14.5646	6.13434e-43	5.89524e-42
ACAN	5.97923	1.74895	3.37566	1.38549	2.60356	14.5561	6.77151e-43	6.50404e-42
ARHGAP21	10.4656	0.734198	11.5602	0.581438	-1.09461	-14.556	6.77982e-43	6.50848e-42
PRIMA1	5.37621	1.82974	8.01004	0.676775	-2.63384	-14.5518	7.12086e-43	6.83216e-42
GPR120	2.70548	1.11196	4.45607	1.37731	-1.75059	-14.5465	7.56924e-43	7.25841e-42
TCF7L2	8.89679	1.01894	10.3632	0.382506	-1.46645	-14.5345	8.70663e-43	8.34456e-42
PHLDB1	10.6996	0.701596	11.7904	0.807188	-1.09082	-14.5298	9.19853e-43	8.81122e-42
FEZ1	6.4302	1.10536	8.04861	0.704567	-1.61841	-14.5216	1.01158e-42	9.67941e-42
LPHN2	8.93544	1.2456	10.7262	0.474961	-1.79076	-14.5195	1.03628e-42	9.91032e-42
IL17RD	8.87506	1.25458	10.7264	0.916665	-1.85137	-14.5143	1.10023e-42	1.05163e-41
SERINC2	11.7256	0.986641	10.1075	1.4966	1.6181	14.5129	1.119e-42	1.06899e-41
CASP10	7.1162	0.963045	8.53299	0.672803	-1.41679	-14.5073	1.19383e-42	1.13924e-41
IRF7	9.24036	1.12712	7.58738	0.752972	1.65298	14.5068	1.20121e-42	1.14566e-41
PIWIL2	2.37886	1.49932	4.63322	1.36823	-2.25436	-14.5065	1.20462e-42	1.14829e-41
GYPE	2.18746	0.95255	3.65883	1.06875	-1.47136	-14.5042	1.23757e-42	1.17906e-41
BVES	5.70209	1.17076	7.41008	0.718312	-1.70798	-14.4998	1.30314e-42	1.2402e-41
TNNT1	7.40145	3.08871	2.8092	2.53034	4.59225	14.4998	1.30289e-42	1.2402e-41
MFAP2	9.60733	1.47431	7.46354	0.8536	2.14379	14.497	1.34508e-42	1.27942e-41
SLC9A3R1	12.4954	1.18412	10.7149	1.10207	1.78051	14.4725	1.78808e-42	1.69897e-41
FAM158A	7.42735	0.82107	6.22079	0.582261	1.20656	14.4706	1.82855e-42	1.73555e-41
C17orf51	6.69743	1.10466	8.28439	0.470115	-1.58696	-14.47	1.84126e-42	1.74667e-41
FAM173A	7.43891	1.12426	5.79806	0.727385	1.64086	14.4639	1.97674e-42	1.87419e-41
PTPRQ	1.92752	2.16677	5.21514	2.19873	-3.28762	-14.4613	2.03722e-42	1.92842e-41
FLT4	7.85159	0.894565	9.15935	0.595206	-1.30776	-14.4573	2.13413e-42	2.018e-41
SLC27A4	9.88368	0.688878	8.87422	0.476138	1.00946	14.4449	2.4627e-42	2.32495e-41
GABRA2	1.27083	1.66075	3.76621	1.56784	-2.49537	-14.444	2.48929e-42	2.3488e-41
DNAH1	6.62974	0.983676	8.06398	0.638625	-1.43424	-14.443	2.51778e-42	2.3744e-41
ITPKA	3.69249	1.78312	1.13441	0.789812	2.55807	14.4425	2.53267e-42	2.38717e-41
TP63	6.51464	2.44197	10.164	2.2013	-3.64939	-14.4409	2.57961e-42	2.43012e-41
GPR64	3.89994	1.70443	6.41202	1.31992	-2.51209	-14.4377	2.6781e-42	2.52156e-41
RRAGD	7.73299	1.18213	9.44975	0.724269	-1.71676	-14.4354	2.75049e-42	2.58834e-41
LRP1	12.633	1.07936	14.2596	1.04864	-1.62658	-14.4315	2.87692e-42	2.70443e-41
JAM3	8.8848	0.974311	10.2766	0.361436	-1.39177	-14.4281	2.99159e-42	2.81073e-41
KLRF1	1.89318	1.27103	3.75966	0.948868	-1.86648	-14.4213	3.23811e-42	3.04073e-41
CAB39L	9.26621	0.994799	10.6992	0.515977	-1.43299	-14.4181	3.35746e-42	3.15112e-41
CEBPA	8.91065	0.99752	10.5686	1.63702	-1.65798	-14.4082	3.7669e-42	3.53352e-41
ZNF660	3.16296	1.08925	4.73477	0.61113	-1.57182	-14.4009	4.09759e-42	3.84168e-41
B4GALT6	5.82116	1.04438	7.33431	0.641261	-1.51315	-14.3969	4.29303e-42	4.02064e-41
LOC440173	1.27695	1.33468	3.23604	1.01441	-1.95909	-14.3964	4.31655e-42	4.04053e-41
KRT19	14.6675	1.488	12.118	2.71693	2.54946	14.3908	4.60471e-42	4.30798e-41
SPG20	9.70125	0.855224	10.9205	0.32526	-1.21924	-14.3875	4.7832e-42	4.47023e-41
NMB	6.07592	1.26424	8.00083	1.36385	-1.92491	-14.3863	4.85179e-42	4.53193e-41
GREM2	4.1412	1.89219	6.87321	1.11424	-2.73201	-14.3861	4.86296e-42	4.53997e-41
RABEP2	9.18853	0.887523	7.8532	0.872352	1.33533	14.3824	5.07791e-42	4.73813e-41
KIAA0427	9.54294	0.720855	10.6447	0.793495	-1.10179	-14.382	5.09787e-42	4.75424e-41
C6orf204	4.23708	1.24553	6.06046	0.928096	-1.82338	-14.3782	5.32983e-42	4.96532e-41
SULT1C4	4.06965	1.54018	6.27008	0.687444	-2.20043	-14.3782	5.32884e-42	4.96532e-41
ACSL5	8.11772	1.21412	9.84144	0.395967	-1.72372	-14.3771	5.39643e-42	5.02471e-41
KDR	9.50302	0.908887	10.828	0.636721	-1.32501	-14.3714	5.76075e-42	5.36111e-41
C8orf34	2.21515	1.64127	4.66178	1.51145	-2.44664	-14.3692	5.91299e-42	5.49989e-41
CNTN6	1.22866	1.3029	3.17169	1.20774	-1.94303	-14.3619	6.43392e-42	5.97813e-41
C19orf28	9.97199	0.688653	8.94852	0.611036	1.02347	14.3569	6.81654e-42	6.32698e-41
PTCHD3	1.15605	1.66837	3.65461	1.61314	-2.49856	-14.3567	6.82681e-42	6.33318e-41
EYS	3.43423	1.06185	5.0715	1.25875	-1.63727	-14.3546	6.99567e-42	6.48643e-41
C9orf116	7.261	1.29112	5.41103	0.662896	1.84997	14.3532	7.11016e-42	6.58912e-41
BRI3BP	6.79621	0.778799	5.65148	0.619073	1.14473	14.3492	7.44516e-42	6.89596e-41
NEDD9	9.80891	1.19898	11.5342	0.690225	-1.72525	-14.346	7.73139e-42	7.15731e-41
KCTD13	8.56417	0.730096	7.50835	0.456528	1.05582	14.3419	8.09928e-42	7.48611e-41
CNGA1	3.13764	1.91291	5.87027	0.93064	-2.73264	-14.3416	8.13121e-42	7.51169e-41
DRD2	2.79421	1.99188	5.72871	1.66288	-2.9345	-14.3413	8.15512e-42	7.52984e-41
ABHD11	9.88758	0.855921	8.62526	0.714294	1.26232	14.3412	8.16969e-42	7.53935e-41
SOX5	3.97167	1.67645	6.42057	1.26687	-2.4489	-14.3363	8.6415e-42	7.97059e-41
GLB1L3	0.89678	1.21615	2.74956	1.34953	-1.85278	-14.335	8.77816e-42	8.08819e-41
ITGA9	6.74347	1.38503	8.70819	0.519348	-1.96472	-14.3331	8.97159e-42	8.25937e-41
NGFR	6.85653	2.11927	9.90205	1.22271	-3.04552	-14.333	8.97331e-42	8.25937e-41
FCGR1A	6.61524	1.05918	4.93513	1.46967	1.6801	14.3308	9.21358e-42	8.47611e-41
NTF4	2.56247	1.73671	5.23494	2.06749	-2.67246	-14.323	1.00754e-41	9.26415e-41
GULP1	6.69716	1.41738	8.70996	0.593165	-2.0128	-14.3144	1.11237e-41	1.02174e-40
C6orf154	5.39899	1.44242	3.28056	1.19123	2.11843	14.3075	1.20469e-41	1.10481e-40
GBAP1	9.21761	0.734448	8.16284	0.420883	1.05477	14.3037	1.2589e-41	1.15393e-40
FYN	8.69757	0.869226	9.9753	0.721379	-1.27773	-14.3017	1.28739e-41	1.17943e-40
MECOM	7.52995	1.05861	9.07029	0.78034	-1.54035	-14.2988	1.3323e-41	1.21994e-40
SDC1	12.5284	1.33	10.3724	2.04744	2.15599	14.2977	1.34811e-41	1.23378e-40
C10orf105	2.76084	1.11418	4.36683	0.711122	-1.60598	-14.2951	1.38997e-41	1.27142e-40
COX6C	12.8028	1.51596	10.6651	0.474964	2.13776	14.2923	1.43464e-41	1.31161e-40
APCDD1L	4.99859	1.85366	7.74896	1.73133	-2.75038	-14.2813	1.62973e-41	1.4892e-40
CHRNA6	2.97748	1.65084	0.631455	0.784164	2.34602	14.2766	1.71979e-41	1.56986e-40
ABCG2	5.79793	1.40082	7.80405	0.811836	-2.00612	-14.2764	1.72389e-41	1.5728e-40
MYOZ2	1.02665	1.09879	2.74746	1.4615	-1.72081	-14.275	1.75097e-41	1.59668e-40
ALPL	7.69999	1.49156	9.84354	0.934051	-2.14355	-14.2726	1.79949e-41	1.64007e-40
AKAP2	8.49339	1.6114	10.7757	0.691007	-2.28235	-14.2701	1.8524e-41	1.68743e-40
IRS2	8.94787	1.35989	10.8837	0.693824	-1.93586	-14.2642	1.98332e-41	1.80482e-40
SNCAIP	5.30759	1.49757	7.42256	0.577719	-2.11497	-14.2626	2.01946e-41	1.83676e-40
B3GALT2	2.14274	1.05721	3.67159	0.74079	-1.52885	-14.2603	2.07349e-41	1.88493e-40
PNMAL2	5.54333	1.21317	7.26567	0.573018	-1.72234	-14.2603	2.07499e-41	1.88532e-40
DSCR6	5.17807	1.78847	2.61354	1.09437	2.56453	14.26	2.08085e-41	1.88967e-40
C9orf100	6.85513	0.967399	5.4736	0.532635	1.38153	14.2598	2.08563e-41	1.89305e-40
ATAD2	10.3817	1.08041	8.82484	0.71915	1.55687	14.2561	2.17722e-41	1.97516e-40
LDB3	4.41003	1.16129	6.21733	1.50723	-1.8073	-14.2557	2.18767e-41	1.98362e-40
MFSD3	8.60025	1.05417	7.08704	0.656299	1.51321	14.2538	2.23442e-41	2.02498e-40
KREMEN2	4.6573	2.00783	1.79934	1.06421	2.85796	14.247	2.4158e-41	2.1871e-40
FAM7A3	2.17577	0.983882	3.65424	1.03373	-1.47848	-14.2453	2.46424e-41	2.22981e-40
ARMC9	8.50529	0.650682	7.49926	0.813286	1.00604	14.2426	2.54245e-41	2.29941e-40
C2orf89	3.51917	1.37787	5.52203	1.06262	-2.00286	-14.2412	2.58283e-41	2.33473e-40
C9orf172	4.14636	1.32883	2.25282	0.729426	1.89354	14.2379	2.68142e-41	2.42261e-40
SLITRK2	1.6731	1.30891	3.65774	1.47716	-1.98464	-14.2317	2.88022e-41	2.60089e-40
TMEM125	8.90758	0.945933	7.12788	2.26482	1.7797	14.2303	2.92679e-41	2.64159e-40
CPNE8	6.49407	1.15009	8.13425	0.649075	-1.64017	-14.23	2.93851e-41	2.65082e-40
NR4A3	5.72773	1.5899	8.17527	1.97006	-2.44754	-14.2283	2.99606e-41	2.70135e-40
KIAA1543	9.51844	0.954483	7.6657	2.44442	1.85274	14.2278	3.01373e-41	2.71589e-40
DOC2B	3.1996	1.79216	5.74529	0.940172	-2.54568	-14.2221	3.21484e-41	2.89565e-40
SCT	2.63553	1.6529	0.312446	0.578049	2.32308	14.2215	3.23825e-41	2.91525e-40
C8orf38	8.72931	0.820801	7.56145	0.440501	1.16786	14.2158	3.4596e-41	3.11293e-40
OSBPL1A	10.2282	0.803553	11.3668	0.383985	-1.13867	-14.2152	3.48368e-41	3.13301e-40
NAB1	9.49283	0.81264	10.6426	0.375171	-1.14974	-14.2084	3.76617e-41	3.38361e-40
RASGRP2	4.88272	1.2819	6.70862	0.731545	-1.8259	-14.2076	3.79718e-41	3.40973e-40
ZSCAN4	0.481252	0.786179	1.66782	0.867679	-1.18656	-14.2003	4.1326e-41	3.70716e-40
PLK4	7.46883	0.98034	6.06461	0.630036	1.40422	14.1967	4.30296e-41	3.85607e-40
BIN1	7.89008	1.14141	9.55752	0.967282	-1.66744	-14.194	4.43893e-41	3.97589e-40
C19orf46	8.14376	1.14571	6.17124	2.21024	1.97251	14.1934	4.4701e-41	4.00179e-40
FAM108C1	9.19833	0.906799	7.85579	0.871532	1.34254	14.1912	4.58676e-41	4.10414e-40
HTR1D	3.54171	1.63079	1.24406	0.723221	2.29766	14.1825	5.06728e-41	4.52951e-40
KIFC2	9.17744	1.23099	7.42578	0.715235	1.75165	14.1813	5.13672e-41	4.58926e-40
SPOCK3	1.09599	1.402	3.28802	1.91305	-2.19203	-14.1806	5.17522e-41	4.62131e-40
RGMA	7.12896	1.80994	9.66104	0.570419	-2.53209	-14.1799	5.22138e-41	4.65782e-40
C1QTNF7	4.6672	1.85012	7.36636	1.57647	-2.69916	-14.1746	5.54534e-41	4.94182e-40
PKDCC	6.71732	1.3639	8.76567	1.48389	-2.04835	-14.1742	5.57084e-41	4.96204e-40
PDE1B	6.56382	1.06644	8.21391	1.38389	-1.65009	-14.172	5.71651e-41	5.08922e-40
ZNF502	5.89835	1.31252	7.73233	0.390761	-1.83398	-14.1692	5.90084e-41	5.25067e-40
C16orf13	9.46486	0.84706	8.26152	0.477383	1.20334	14.1662	6.10324e-41	5.42804e-40
GLT1D1	1.88893	1.14993	3.57139	1.01073	-1.68246	-14.1661	6.1128e-41	5.43381e-40
PFDN6	9.11142	0.757451	8.03261	0.450252	1.0788	14.1629	6.3393e-41	5.63231e-40
TCEB2	11.103	0.830848	9.92002	0.493757	1.18294	14.1627	6.35946e-41	5.64738e-40
IFI30	11.298	0.925909	9.88451	1.1191	1.41347	14.1616	6.43343e-41	5.71019e-40
VLDLR	8.05515	1.23407	9.85475	1.05274	-1.7996	-14.1616	6.4394e-41	5.71262e-40
MICAL3	9.33051	0.833201	10.5082	0.416559	-1.17765	-14.1592	6.61859e-41	5.86864e-40
C16orf93	6.11961	1.15651	4.40905	1.13168	1.71056	14.1536	7.05567e-41	6.25305e-40
MAP3K8	7.2271	1.08532	8.79493	0.833226	-1.56782	-14.1531	7.09098e-41	6.27975e-40
MYH3	4.006	1.19532	5.72731	0.881747	-1.72131	-14.1531	7.09291e-41	6.27975e-40
CPS1	5.46663	1.64015	7.76941	0.690842	-2.30278	-14.1521	7.17939e-41	6.35313e-40
FOLR2	6.70826	1.40771	8.83137	1.59956	-2.12311	-14.1422	8.0348e-41	7.10653e-40
CHD9	9.76784	0.852005	10.9807	0.522885	-1.21284	-14.1386	8.37799e-41	7.40636e-40
GIMAP1	6.04243	1.11588	7.64183	0.790545	-1.5994	-14.1251	9.77476e-41	8.6325e-40
ARHGAP25	7.4954	0.832635	8.67387	0.464323	-1.17847	-14.1195	1.04198e-40	9.19293e-40
C22orf23	5.00193	0.929562	6.32633	0.601288	-1.3244	-14.1144	1.10461e-40	9.74062e-40
EPYC	4.28155	2.62174	0.637575	0.735592	3.64397	14.1108	1.15075e-40	1.01425e-39
JUN	11.6986	1.10364	13.2898	0.861153	-1.59117	-14.1079	1.18974e-40	1.04757e-39
SPATA9	2.61579	0.800693	3.87218	1.13408	-1.25639	-14.1045	1.23677e-40	1.08843e-39
PLTP	9.83379	1.12425	11.4602	0.917982	-1.62639	-14.1026	1.26358e-40	1.11147e-39
CDC25A	6.74066	1.26697	4.92083	0.94897	1.81984	14.1024	1.26698e-40	1.11336e-39
NUBP2	9.97492	0.780413	8.84341	0.65028	1.13151	14.0969	1.34943e-40	1.18463e-39
CLEC10A	4.34793	2.01513	7.20764	1.2813	-2.85971	-14.0852	1.54106e-40	1.35151e-39
FAM69A	7.85996	0.858772	9.10359	0.714976	-1.24363	-14.0851	1.5437e-40	1.35315e-39
DDX26B	6.46685	1.15518	8.10568	0.725017	-1.63882	-14.0833	1.57492e-40	1.37915e-39
KALRN	7.64884	1.14897	9.2527	0.461737	-1.60386	-14.0802	1.63148e-40	1.42726e-39
EDN1	6.93167	1.58476	9.16584	0.883702	-2.23416	-14.0794	1.64711e-40	1.44022e-39
HCN2	3.80537	1.78543	1.31355	0.731664	2.49181	14.0779	1.6765e-40	1.46519e-39
HRNR	2.38173	1.37071	4.37844	1.2311	-1.99671	-14.0764	1.70405e-40	1.48853e-39
C9orf89	8.68957	0.812145	7.53161	0.555934	1.15796	14.0721	1.79116e-40	1.56308e-39
PCDH11X	1.6834	1.88619	4.35414	1.17262	-2.67074	-14.0702	1.8299e-40	1.59531e-39
SOD2	11.4791	0.900202	12.7515	0.53016	-1.27236	-14.0688	1.85885e-40	1.61975e-39
CYP39A1	4.54226	2.02596	7.35305	0.641726	-2.81079	-14.0622	2.00357e-40	1.74499e-39
DPCD	8.46559	0.704688	7.46091	0.488538	1.00468	14.0526	2.23598e-40	1.94261e-39
ABCA1	9.40064	0.948871	10.8159	1.04108	-1.41522	-14.0516	2.2603e-40	1.96278e-39
HIST1H2BE	3.54929	1.12635	1.94949	0.752065	1.5998	14.0501	2.30052e-40	1.99672e-39
RGNEF	8.2222	1.0261	9.65782	0.490867	-1.43563	-14.0437	2.47506e-40	2.14505e-39
SEMA6A	8.01379	1.45973	10.0332	0.409239	-2.01941	-14.0401	2.57937e-40	2.23326e-39
CC2D2A	7.87844	0.799568	8.99436	0.346492	-1.11592	-14.0397	2.58962e-40	2.24104e-39
SHMT1	9.20987	0.684553	10.2121	0.650283	-1.00221	-14.0394	2.59861e-40	2.24771e-39
PNPLA2	10.9786	0.851284	12.3133	1.23005	-1.33475	-14.0325	2.81237e-40	2.43142e-39
RIC3	4.255	2.32905	7.49579	0.982494	-3.24079	-14.0279	2.96227e-40	2.55976e-39
LATS2	8.66709	0.812527	9.8215	0.552978	-1.15441	-14.0275	2.97754e-40	2.5717e-39
KANK2	10.4055	0.686744	11.4342	0.779549	-1.02867	-14.0267	3.00361e-40	2.59294e-39
SLC12A4	9.4356	0.729411	10.4655	0.443957	-1.02987	-14.0219	3.17045e-40	2.7343e-39
PCDHGB6	5.18325	1.51345	7.28366	0.577564	-2.10041	-14.0191	3.27527e-40	2.82332e-39
RAB3A	6.89971	0.932115	5.58423	0.576841	1.31548	14.0145	3.45166e-40	2.97392e-39
LOC121838	1.69982	1.67476	4.13909	1.57109	-2.43926	-14.0111	3.58765e-40	3.08958e-39
ALDOC	7.67161	1.70337	10.0663	0.997138	-2.39471	-14.0107	3.60385e-40	3.10201e-39
GVIN1	5.33669	1.34057	7.22803	0.842356	-1.89135	-14.0076	3.73166e-40	3.2089e-39
TCP11L2	6.78317	1.03693	8.24596	0.654563	-1.46279	-13.9971	4.20381e-40	3.61139e-39
GGCT	10.9144	0.809052	9.7747	0.491687	1.13966	13.9955	4.28223e-40	3.67697e-39
PCDHB15	4.58034	1.01913	6.00769	0.552409	-1.42735	-13.9954	4.29016e-40	3.68199e-39
ARRDC1	10.0162	0.784091	8.8853	0.667954	1.13086	13.9944	4.33813e-40	3.72135e-39
MYEOV	4.2047	2.37334	7.59471	1.84524	-3.39001	-13.9901	4.55663e-40	3.90689e-39
C1orf35	8.46987	0.835702	7.28558	0.572861	1.18429	13.9863	4.75639e-40	4.07618e-39
TRIM2	8.88076	1.44239	10.8926	0.722765	-2.01181	-13.9857	4.78586e-40	4.09945e-39
PCDHGA2	4.74603	1.78369	7.21503	0.725181	-2.469	-13.9652	6.04496e-40	5.17294e-39
GRM7	1.13687	1.25736	2.91958	0.903488	-1.78271	-13.9615	6.30615e-40	5.39383e-39
GPR68	7.72727	1.09068	6.1899	0.713584	1.53737	13.9592	6.46952e-40	5.53089e-39
TIGD5	7.60874	0.905609	6.30644	0.771682	1.3023	13.9588	6.49696e-40	5.55166e-39
TMIE	2.07074	1.1505	3.67507	0.605649	-1.60434	-13.9536	6.89545e-40	5.88932e-39
IGSF8	10.8602	0.760533	9.76928	0.629947	1.09087	13.9521	7.013e-40	5.98393e-39
PPL	10.1861	1.05916	11.6718	0.641171	-1.48574	-13.9491	7.25126e-40	6.17827e-39
CYR61	11.3101	1.36523	13.2645	1.1241	-1.95438	-13.9487	7.29074e-40	6.20891e-39
EPHB6	5.76276	1.73746	8.15407	0.555431	-2.39132	-13.947	7.42824e-40	6.32296e-39
ENTPD7	8.92091	0.769852	7.81803	0.63355	1.10289	13.9436	7.72171e-40	6.56327e-39
GOLGA6L10	6.09525	0.944664	7.41504	0.528334	-1.31979	-13.9404	8.00791e-40	6.79998e-39
C12orf48	6.92724	0.908561	5.6491	0.591159	1.27813	13.9307	8.93703e-40	7.58166e-39
PGM1	10.2048	0.748834	11.3188	0.853598	-1.11396	-13.9254	9.48925e-40	8.0424e-39
FLJ37543	0.952832	1.14818	2.62247	1.11709	-1.66964	-13.9246	9.57925e-40	8.11478e-39
LUZP2	3.39398	1.9468	6.16098	1.5175	-2.767	-13.9168	1.04686e-39	8.85968e-39
SATB1	8.04343	1.33878	9.88688	0.496216	-1.84345	-13.9155	1.06151e-39	8.97501e-39
LOC728819	3.4217	1.27212	5.17394	0.4782	-1.75224	-13.9154	1.06275e-39	8.98126e-39
RHBDL1	5.79938	1.67803	3.47979	0.746592	2.31959	13.9139	1.08157e-39	9.13588e-39
SLC4A4	4.23319	2.21317	7.38069	1.75525	-3.1475	-13.9065	1.17571e-39	9.92157e-39
MAP3K15	0.877444	0.87129	2.16931	0.984792	-1.29186	-13.904	1.20945e-39	1.02014e-38
LOC286002	1.59057	1.63464	3.98128	1.69116	-2.39071	-13.9021	1.23666e-39	1.04161e-38
HIST1H2BO	2.24178	1.36497	0.361642	0.544832	1.88014	13.8991	1.27801e-39	1.0754e-38
GRASP	6.20069	1.1091	7.76791	0.810431	-1.56722	-13.8958	1.32795e-39	1.1169e-38
OLFML2A	9.68631	0.88388	10.9118	0.446188	-1.22548	-13.8871	1.46471e-39	1.23016e-38
HDAC4	8.17723	0.753261	9.21616	0.31379	-1.03893	-13.8854	1.49239e-39	1.25281e-38
ALDOA	14.8741	0.780227	13.7655	0.613767	1.1086	13.8829	1.53633e-39	1.28909e-38
FAM7A2	1.06358	0.85857	2.34417	1.01892	-1.2806	-13.8773	1.63736e-39	1.3732e-38
SCN7A	3.5581	2.19819	6.61045	1.21974	-3.05236	-13.8734	1.71093e-39	1.43287e-38
MICAL2	10.9803	0.97532	9.61918	0.593413	1.36115	13.8721	1.73535e-39	1.45262e-38
MCTP1	6.18686	1.34653	8.06149	0.792571	-1.87463	-13.8679	1.8202e-39	1.52293e-38
CNR1	3.96439	2.1071	6.88384	1.11773	-2.91945	-13.8678	1.82155e-39	1.52334e-38
FHOD3	7.42786	1.27442	9.19842	0.723123	-1.77056	-13.8614	1.95933e-39	1.63778e-38
TMCC3	7.48915	1.11636	9.03821	0.612909	-1.54906	-13.861	1.9687e-39	1.64484e-38
EXOSC4	8.76891	0.963428	7.40943	0.712355	1.35948	13.8609	1.97056e-39	1.64562e-38
JMJD1C	10.3064	0.742739	11.3492	0.507039	-1.0428	-13.8549	2.10924e-39	1.7606e-38
HIST2H3C	2.44724	1.36417	0.574561	0.543395	1.87267	13.8528	2.15979e-39	1.80108e-38
TNFRSF1B	8.97568	0.908798	10.2663	0.735042	-1.29064	-13.8499	2.22973e-39	1.85766e-38
DNAH9	2.68104	1.70494	5.06763	1.14367	-2.38659	-13.8495	2.24078e-39	1.8651e-38
PPDPF	12.2283	0.847742	11.0297	0.654139	1.1986	13.8392	2.5158e-39	2.09105e-38
FADS3	8.05284	0.857974	9.37105	1.20515	-1.3182	-13.8382	2.54488e-39	2.11323e-38
OVOL2	8.05094	0.89167	6.35765	2.31114	1.6933	13.837	2.57929e-39	2.1408e-38
TMEM133	5.70298	0.965073	7.03522	0.480027	-1.33225	-13.837	2.58095e-39	2.14117e-38
EMILIN3	3.31845	2.11244	6.29514	1.58918	-2.97669	-13.836	2.61076e-39	2.16488e-38
LRRC59	11.9241	0.75793	10.8755	0.397606	1.0486	13.8313	2.75203e-39	2.28096e-38
MYOM2	3.82768	1.60269	6.17579	1.74865	-2.34811	-13.8238	2.99584e-39	2.4807e-38
TMEM90B	6.48726	1.8731	3.87256	1.24062	2.6147	13.8224	3.04326e-39	2.51879e-38
MYO16	3.05583	1.58562	5.37759	1.72599	-2.32176	-13.8204	3.1131e-39	2.57417e-38
PLAUR	9.17596	1.0894	7.63273	0.881863	1.54323	13.8192	3.15589e-39	2.60833e-38
ZNF204P	6.20813	1.72618	8.55876	0.515237	-2.35063	-13.812	3.42218e-39	2.82578e-38
RASGEF1B	7.03469	1.10878	8.56989	0.631881	-1.5352	-13.8087	3.55172e-39	2.93137e-38
TCN2	8.49861	0.892484	9.76682	0.751756	-1.2682	-13.8076	3.59668e-39	2.96709e-38
SORD	10.2252	1.19334	8.54314	0.921194	1.68205	13.806	3.66203e-39	3.01959e-38
MSRA	6.75726	0.928293	8.02821	0.374099	-1.27094	-13.8031	3.78122e-39	3.11351e-38
TCEAL2	3.12042	1.84334	5.68694	1.19829	-2.56652	-13.8015	3.85167e-39	3.16857e-38
BLM	7.11469	1.13594	5.52283	0.81363	1.59186	13.8003	3.90199e-39	3.20847e-38
DCHS2	3.81463	1.62849	6.0919	1.15239	-2.27728	-13.7881	4.4778e-39	3.67679e-38
C9orf169	4.08743	1.6124	1.87125	0.804699	2.21618	13.7853	4.62045e-39	3.79216e-38
ZNF695	5.05769	1.61634	2.81372	1.02012	2.24397	13.7829	4.74758e-39	3.89469e-38
IRAK3	7.19751	1.472	9.23551	0.885117	-2.038	-13.7785	4.99025e-39	4.08996e-38
EPHA4	7.1265	1.33297	8.94303	0.483617	-1.81653	-13.7775	5.04615e-39	4.13195e-38
IL6R	6.70139	1.32561	8.50895	0.497232	-1.80756	-13.7768	5.0846e-39	4.1615e-38
ZNF367	7.50834	0.973424	6.16202	0.568065	1.34632	13.7753	5.17143e-39	4.2306e-38
BBC3	7.65732	1.06425	6.10951	1.12852	1.54781	13.7716	5.3932e-39	4.40998e-38
C6	3.0798	2.39873	6.57679	2.60008	-3.49699	-13.7712	5.41648e-39	4.42697e-38
PRKAR2B	9.65163	1.41141	11.7314	1.63842	-2.07979	-13.7705	5.45851e-39	4.45925e-38
ASPSCR1	8.88182	0.792234	7.77178	0.577423	1.11004	13.7701	5.48721e-39	4.47856e-38
STX1A	6.92639	0.981446	5.55687	0.684054	1.36951	13.763	5.94385e-39	4.84678e-38
STON1	7.71587	1.18263	9.36816	0.846751	-1.65229	-13.7599	6.15111e-39	5.01115e-38
PASK	8.13525	0.706808	7.1107	0.730774	1.02455	13.7585	6.25357e-39	5.09228e-38
DCN	12.9722	1.77423	15.4137	0.968944	-2.44145	-13.7558	6.44362e-39	5.24461e-38
CDH12	2.67088	1.27857	4.56277	1.53142	-1.89189	-13.7549	6.50807e-39	5.29463e-38
GAS2L2	2.17856	1.68658	4.51009	1.02069	-2.33153	-13.7547	6.52637e-39	5.30707e-38
PTGDS	6.79797	1.95741	9.48237	0.988057	-2.6844	-13.7511	6.79708e-39	5.52466e-38
RAD54B	7.25408	1.01958	5.84117	0.643642	1.41291	13.7494	6.92484e-39	5.62592e-38
MYLK4	4.26481	1.08143	5.77163	0.750738	-1.50681	-13.7488	6.97127e-39	5.66103e-38
PPP1R14B	10.2402	0.947669	8.9326	0.54807	1.30757	13.7473	7.08762e-39	5.75286e-38
CYP46A1	3.75059	1.09028	5.26759	0.747201	-1.51701	-13.7409	7.61678e-39	6.17669e-38
FAM184A	5.49099	1.45618	7.47272	0.57531	-1.98173	-13.7366	7.99763e-39	6.47958e-38
SLC25A34	3.73591	1.03303	5.22134	1.02409	-1.48542	-13.7356	8.09107e-39	6.54928e-38
MMP28	6.05333	1.31827	7.94109	1.26681	-1.88776	-13.7349	8.155e-39	6.59498e-38
MYL9	11.9203	1.10682	13.4484	0.666068	-1.52815	-13.7346	8.18086e-39	6.61286e-38
EBP	9.52069	0.72822	8.50744	0.49698	1.01325	13.73	8.61472e-39	6.9572e-38
RIMBP2	2.26342	1.71352	4.60526	0.815283	-2.34183	-13.7295	8.66538e-39	6.99491e-38
HAPLN1	4.76443	2.38895	1.49589	1.20617	3.26854	13.72	9.63836e-39	7.77321e-38
ANKRD35	5.23913	1.62575	7.44319	0.575719	-2.20406	-13.715	1.01905e-38	8.20353e-38
LOC338758	4.64568	0.890239	5.86947	0.498982	-1.22379	-13.7133	1.03845e-38	8.35591e-38
EVC2	5.83082	1.33982	7.64579	0.459174	-1.81497	-13.709	1.09013e-38	8.75971e-38
NOV	6.74806	1.43886	8.74064	0.960547	-1.99259	-13.7034	1.16162e-38	9.32995e-38
MXI1	9.65253	0.84063	10.8016	0.414368	-1.14911	-13.7009	1.1935e-38	9.58163e-38
CAMK1	7.63301	0.749175	8.75639	0.982935	-1.12338	-13.6937	1.29414e-38	1.03849e-37
OR2A1	2.12463	0.782207	3.24564	0.769674	-1.121	-13.693	1.30555e-38	1.0467e-37
FAM124A	4.31231	1.16509	5.89612	0.504097	-1.58381	-13.6875	1.38742e-38	1.11182e-37
KCTD14	5.91262	1.87322	8.51466	1.34233	-2.60204	-13.6858	1.41434e-38	1.13289e-37
CRTAC1	3.91766	2.27089	7.01043	1.09405	-3.09277	-13.6784	1.53678e-38	1.22909e-37
CALCR	2.18775	1.3929	4.17703	1.35567	-1.98928	-13.6782	1.5402e-38	1.23091e-37
C7orf47	7.87278	0.887949	6.64505	0.590165	1.22774	13.6744	1.60819e-38	1.28466e-37
C5orf53	8.00558	0.733853	9.02373	0.510687	-1.01816	-13.674	1.61455e-38	1.28916e-37
CDC7	7.54243	1.05834	6.06601	0.809013	1.47641	13.6716	1.65788e-38	1.32316e-37
C3orf67	5.67745	1.29753	3.9058	0.675596	1.77165	13.6707	1.67511e-38	1.3363e-37
NOS1	0.566845	1.00139	2.12203	1.55162	-1.55519	-13.6704	1.68191e-38	1.34052e-37
RASL12	7.09438	1.09456	8.58477	0.522941	-1.49039	-13.6698	1.69215e-38	1.34807e-37
PHACTR2	8.92264	0.873566	10.1334	0.607065	-1.21077	-13.6691	1.70557e-38	1.35815e-37
HERC2P2	8.91115	0.996357	10.2865	0.65194	-1.37537	-13.6681	1.72475e-38	1.3728e-37
EPS8L1	9.2291	1.20743	7.32492	1.98502	1.90417	13.6676	1.73564e-38	1.38085e-37
ETS1	10.53	0.942979	11.8226	0.539724	-1.29258	-13.6635	1.81675e-38	1.44473e-37
MXD3	7.5041	0.904731	6.25186	0.621289	1.25223	13.6618	1.85056e-38	1.47095e-37
CHAF1B	8.28222	0.801847	7.13736	0.780222	1.14486	13.6612	1.86346e-38	1.48054e-37
NRP1	10.7867	0.871447	12.0317	0.855719	-1.24499	-13.6577	1.93798e-38	1.53836e-37
ZNF559	7.68688	0.819864	8.81158	0.482228	-1.1247	-13.6519	2.06783e-38	1.63995e-37
TIE1	8.68658	0.94361	9.99387	0.666935	-1.30729	-13.6507	2.09558e-38	1.66122e-37
KCNS1	2.41291	1.87445	5.10315	1.94091	-2.69023	-13.642	2.31027e-38	1.82977e-37
HSPA12A	7.86983	0.953041	9.32283	1.38228	-1.453	-13.636	2.47183e-38	1.95685e-37
SYNGR3	4.99746	1.65373	2.7466	0.865938	2.25087	13.6279	2.7055e-38	2.13896e-37
ACTA2	12.5281	1.21622	14.2228	0.956938	-1.69467	-13.6275	2.71868e-38	2.14841e-37
RPL23AP32	0.650438	0.712925	1.71645	0.9453	-1.06601	-13.6243	2.81575e-38	2.22313e-37
PRUNE2	6.73007	1.50413	8.80017	1.00225	-2.0701	-13.6207	2.93205e-38	2.31392e-37
LOC401052	6.20212	0.842216	7.47499	1.18318	-1.27287	-13.6113	3.25691e-38	2.56915e-37
UST	6.75341	1.39241	8.63442	0.593401	-1.88101	-13.6106	3.28245e-38	2.58813e-37
RPS6KA2	9.38139	0.876401	10.5725	0.44835	-1.19108	-13.6057	3.46757e-38	2.73104e-37
COBLL1	9.24708	1.03393	10.6892	0.837503	-1.44209	-13.6043	3.52126e-38	2.77148e-37
C15orf51	1.78622	1.13264	3.36851	0.936643	-1.5823	-13.6036	3.54811e-38	2.79137e-37
CCDC136	4.24522	1.28317	5.99802	0.758452	-1.7528	-13.6034	3.55908e-38	2.79876e-37
ENPP6	3.1472	1.34393	5.02556	1.12324	-1.87836	-13.6002	3.68702e-38	2.89807e-37
PI3	2.42202	2.65355	6.10686	2.06637	-3.68483	-13.5997	3.70704e-38	2.91251e-37
NACAD	5.55603	1.37309	7.40355	0.511161	-1.84752	-13.597	3.82088e-38	2.99928e-37
CLEC4F	2.58859	1.58468	4.74911	0.925682	-2.16051	-13.5879	4.23119e-38	3.31841e-37
MC1R	6.77747	1.0221	5.36001	0.784644	1.41746	13.5858	4.33213e-38	3.39456e-37
FTO	10.1861	0.80499	11.2838	0.469441	-1.09763	-13.5741	4.93455e-38	3.85975e-37
GRIK1	1.4982	1.9443	4.28975	2.09428	-2.79155	-13.5736	4.96217e-38	3.87963e-37
IL18RAP	2.34535	1.19395	3.98504	0.810837	-1.63969	-13.5724	5.03143e-38	3.93204e-37
AVPI1	7.23799	0.805689	8.39905	0.884163	-1.16106	-13.5709	5.11617e-38	3.9965e-37
AVPR1A	4.54171	1.45301	6.56072	1.16994	-2.01901	-13.5665	5.37271e-38	4.19318e-37
BIK	7.66013	1.31329	5.64294	2.01156	2.01719	13.5645	5.49336e-38	4.28545e-37
C6orf145	8.73996	1.06753	10.1908	0.597269	-1.45083	-13.564	5.52201e-38	4.3059e-37
TMEM145	4.5539	2.23004	1.54692	1.02604	3.00698	13.5616	5.67246e-38	4.42126e-37
HIST1H4J	4.95659	1.38249	3.06818	0.877076	1.8884	13.5552	6.09109e-38	4.74546e-37
APOD	10.8332	2.55157	14.2604	1.04031	-3.42723	-13.5527	6.26234e-38	4.87028e-37
SLC39A11	10.5912	0.965168	9.27595	0.58081	1.31524	13.5523	6.29447e-38	4.89311e-37
AMY2B	6.45409	1.41217	8.35043	0.561986	-1.89634	-13.5517	6.33315e-38	4.92102e-37
OLFM4	4.25631	3.25022	8.7174	2.26819	-4.46109	-13.5496	6.48192e-38	5.03218e-37
ACOT7	9.00629	0.892022	7.79188	0.527732	1.21441	13.548	6.60514e-38	5.12334e-37
SCARF1	7.08583	0.787968	8.19742	0.743856	-1.11159	-13.5445	6.86714e-38	5.32189e-37
TFR2	4.88873	1.90992	2.31787	0.899543	2.57086	13.5276	8.29091e-38	6.4112e-37
PRRG1	7.11281	1.14233	8.64771	0.496085	-1.5349	-13.5274	8.30252e-38	6.41456e-37
JAZF1	8.08805	0.760073	9.13891	0.587013	-1.05086	-13.5274	8.30818e-38	6.41613e-37
LONRF1	8.42025	0.757335	9.45062	0.453313	-1.03037	-13.5246	8.56305e-38	6.60428e-37
GPR75	4.13985	1.13172	5.72427	1.01807	-1.58443	-13.5232	8.70354e-38	6.7097e-37
ST6GALNAC1	3.24011	1.93693	5.83535	0.784391	-2.59524	-13.5198	9.04046e-38	6.9664e-37
[truncated: 2,377 more rows]
